# Supplementary material
Source: PubMed Central journal article supplement (PMC3872057)
Supplement: NIHMS537034-supplement-1_si_001.pdf [file NIHMS537034-supplement-1_si_001.pdf]

## SUPPORTING INFORMATION

# A Cytochrome P450 Serves as an Unexpected Terpene Cyclase during Fungal Meroterpenoid Biosynthesis

Yit-Heng Chooi<sup>†‡</sup>, Young J. Hong<sup>§</sup>, Ralph A. Cacho<sup>†</sup>, Dean J. Tantillo<sup>\*§</sup>, Yi Tang<sup>\*†‡</sup>

<sup>†</sup>Department of Chemical and Biomolecular Engineering, and <sup>‡</sup>Department of Chemistry and Biochemistry, University of California, Los Angeles, CA 90066, United States;

<sup>§</sup>Department of Chemistry, University of California, Davis, CA 95616, United States.

<sup>||</sup>Research School of Biology, Australian National University, Canberra ACT 0200, Australia.

Corresponding Author: [yitang@ucla.edu](mailto:yitang@ucla.edu), [djtantillo@ucdavis.edu](mailto:djtantillo@ucdavis.edu)

### Table of Contents

|                                                                               | Pages |
|-------------------------------------------------------------------------------|-------|
| <b>Experimental Methods</b>                                                   |       |
| Strains and culture conditions                                                | S3    |
| General molecular biology methods                                             | S3    |
| Genetic manipulation of <i>P. aethiopicum</i>                                 | S3    |
| Cloning and expression of <i>vrtK</i> in <i>S. cerevisiae</i>                 | S3    |
| LCMS analysis                                                                 | S4    |
| Compound extraction and purification                                          | S4    |
| NMR characterizations                                                         | S4    |
| Computation Methods                                                           | S5    |
| <b>Supplementary Tables</b>                                                   |       |
| Table S1. List of Primers used in study                                       | S6    |
| Table S2. NMR data of 3 in DMSO-d <sub>6</sub> measured on 500 MHz Bruker NMR | S7    |
| Table S3. NMR data of 2 in DMSO-d <sub>6</sub> measured on 500 MHz Bruker NMR | S8    |
| Table S4. Coordinates and Energies                                            | S9    |
| (i) Path 1: <b>A1</b> → <b>D1</b>                                             | S9    |
| (ii) Path 2: <b>A2</b> → <b>D2</b>                                            | S20   |
| (iii) <b>E2</b> → <b>F1</b> conversion                                        | S31   |
| (iv) Path 3: <b>E3</b> → <b>D3</b>                                            | S35   |
| (v) Path 4: <b>E4</b> → <b>D4</b>                                             | S44   |
| (vi) <i>si</i> → <i>re</i> Facial 1,3-hydride shift                           | S53   |
| (vii) Path 1: <b>A1'</b> → <b>D1'</b>                                         | S56   |
| (viii) Path 2: <b>A2'</b> → <b>D2'</b>                                        | S67   |
| Table S5. IRC plots                                                           | S78   |
| (i) Path 1: <b>A1</b> → <b>D1</b>                                             | S78   |
| (ii) Path 2: <b>A2</b> → <b>D2</b>                                            | S80   |
| (iii) <b>E2</b> → <b>F1</b> conversion                                        | S82   |

|                                       |     |
|---------------------------------------|-----|
| (iv) Path 3: <b>E3</b> → <b>D3</b>    | S83 |
| (v) Path 4: <b>E4</b> → <b>D4</b>     | S85 |
| (vi) Path 1: <b>A1'</b> → <b>D1'</b>  | S87 |
| (vii) Path 2: <b>A2'</b> → <b>D2'</b> | S89 |

### Supplementary Figures

|                                                                         |      |
|-------------------------------------------------------------------------|------|
| Figure S1. Gene deletion strategy for <i>VRT</i> and <i>VRTK</i>        | S91  |
| Figure S2. Construction of pESC-Leu2d-AtCPR-VrtK.                       | S92  |
| Figure S3. <sup>1</sup> H-NMR spectrum of compound <b>3</b> in DMSO-d6  | S93  |
| Figure S4. <sup>13</sup> C-NMR spectrum of compound <b>3</b> in DMSO-d6 | S94  |
| Figure S5. <sup>1</sup> H-NMR spectrum of compound <b>2</b> in DMSO-d6  | S95  |
| Figure S6. <sup>13</sup> C-NMR spectrum of compound <b>2</b> in DMSO-d6 | S96  |
| Figure S7. UV and mass spectra of <b>3</b> and <b>2</b>                 | S97  |
| Figure S8. Feeding of dimethylallyl(C5)-TAN1612 substrate               | S97  |
| Figure S9. Computed Reaction Pathways                                   | S98  |
| (i) Path 1: A1→D1                                                       | S98  |
| (ii) Path 2: A2→D2                                                      | S99  |
| (iii) E2→F1 conversion                                                  | S100 |
| (iv) Path 3: E3→D3                                                      | S101 |
| (v) Path 4: E4→D4                                                       | S102 |
| (vi) si→re Facial 1,3-hydride shift                                     | S103 |
| (vii) Path 1: A1'→D1'                                                   | S104 |
| (viii) Path 2: A2'→D2'                                                  | S105 |

### Supplementary References

S106

## Experimental Methods

**Strains and culture conditions.** *Penicillium aethiopicum* IBT 5753 was obtained from the IBT culture collection (Kgs. Lyngby, Denmark) and maintained on YMEG agar (4 g/L yeast extract, 10 g/L malt extract, and 16 g/L agar) or glucose minimal agar (GMM) at 30 °C. *P. aethiopicum*  $\Delta$ *gsfA::zeo*<sup>R</sup>, which was blocked in griseofulvin biosynthesis, was obtained from previous study.<sup>1</sup> The *E. coli* strain XL-1 Blue (Stratagene) and TOP10 (Invitrogen) were used for DNA manipulation. *Saccharomyces cerevisiae* strain BJ5464 (*MATa ura3-52 his3- $\Delta$ 200 leu2-  $\Delta$ 1 trp1 pep4::HIS3prb1  $\Delta$ 1.6R can1 GAL*) was used as the yeast expression host. The *S. cerevisiae* strain was maintained on yeast peptone dextrose (YPD) agar.

**General molecular biology methods.** Genomic DNA from *P. aethiopicum* was prepared using the CTAB isolation buffer as described elsewhere or using ZYMO ZR fungal/bacterial DNA kit (Zymo Research) according to the manufacturer's protocol. PCR reactions were performed with Phusion high-fidelity DNA polymerase (New England Biolabs, NEB) or Platinum Pfx DNA polymerase (Invitrogen). PCR products were cloned into pCR-Blunt vector (Invitrogen) and confirmed by DNA sequencing. RNA extraction was performed using a RiboPure Yeast Kit (Ambion) and ImProm-II<sup>TM</sup> Reverse Transcription System (Promega) for reverse transcriptase-PCR (RT-PCR) was used to synthesize complementary DNA (cDNA) from total RNA. Primers used for molecular cloning were synthesized by Integrated DNA Technologies and are listed in Table S1.

**Genetic manipulation of *P. aethiopicum*.** Deletion of *vrtE* and *vrtK* were accomplished by a double homologous gene replacement cassette containing the *bar* resistance marker generated by fusion-PCR method described previously,<sup>2,3</sup> and the gene deletion strategy are illustrated in Figure S1. Transformation of *P. aethiopicum* was carried out using the polyethylene-glycol method as described previously.<sup>2</sup> Diagnostic PCR was performed with miniprep genomic DNA from individual transformants prepared using a previously described toothpicks/alkaline lysis-based method.<sup>2,4</sup> The positive transformants were re-verified using higher quality genomic DNA extracted using ZYMO ZR fungal/bacterial DNA kit (Zymo Research). Primers used for the generation of gene deletion cassettes and diagnostic PCR are listed in Table S1 and shown in Figure S1.

**Cloning and expression of *vrtK* in *S. cerevisiae*.** The cDNA of *vrtK* was obtained as two overlapping fragments using RT-PCR from *P. aethiopicum* total RNA extracted after 4 days of growth in YMEG medium. The 5' and 3' primers for RT-PCR of *vrtK* (pESC-VrtK-F and pESC-VrtK-R) contained overhangs that overlap with the *GAL10* promoter cloning site of the pESC-Leu2d-AtCPR plasmid (Figure S2 and Table S1). The plasmid pESC-Leu2d-AtCPR is a gift from Dr. Dae-Kyun Ro at University of Calgary, and contained the *A. terreus* cytochrome P450 reductase (AtCPR) gene under the regulation of the *GAL1* promoter; it is PCR amplified as a linear fragment for cloning into the *GAL10* promoter cloning site. Using a 3-way yeast *in vivo* recombination cloning approach, the complete cDNA of *vrtK* is cloned into pESC-

Leu2d-AtCPR plasmid under the regulation of *GAL10* promoter by transformation of *S. cerevisiae* BJ5464 with the 5' and 3' *vrkK* cDNA fragment along with the linear pESC-Leu2d-AtCPR plasmid using the S.c EasyComp Yeast Transformation Kit (Invitrogen) and selected on Synthetic Complete (SC) dropout agar medium lacking leucine (Figure S2). The strain *S. cerevisiae* BJ5464, which lacks vacuolar proteases,<sup>5</sup> was used for expression of VrtK and AtCPR. For biotransformation of **2** to **1** *in vivo* feeding, a 5 mL seed culture of the yeast strain harboring the pESC-Leu2d-AtCPR-VrtK plasmid growing in the appropriate yeast synthetic dropout medium was inoculated into 500 mL of galactose induction SC medium containing 0.2% glucose and 1.8% galactose and cultured for 8 hours or 24 hours at 30 °C, 250 rpm. After induction, the yeast cells were collected by centrifugation and replenished with 100 mL (1/5 volume) fresh liquid SC medium with 2% galactose to concentrate the cells 5 times. 1 mg of **2** dissolved in DMSO was added to 100 mL high density yeast cultures and incubated at 30 °C, 250 rpm. 5 mL of the high density yeast cultures were sampled after 24 and 48 hours and extracted twice with 5 mL of EtOAc/MeOH/AcOH (89:10:1) followed by drying *in vacuo*. The dried extracts were re-dissolved in 500  $\mu$ L of MeOH and subjected to LCMS analysis.

**LCMS analysis.** All solvents and other chemicals used were of analytical grade. All LC-MS analyses were performed on a Shimadzu 2010 EV LC-MS (Phenomenex® Luna, 5 $\mu$ , 2.0  $\times$  100 mm, C18 column) using positive and negative mode electrospray ionization with a linear gradient of 5-95% MeCN-H<sub>2</sub>O in 30 minutes followed by 95% MeCN for 15 minutes with a flow rate of 0.1 mL/min.

**Compound extraction and purification.** Compound **3** and **2** was purified from *P. aethiopicum*  $\Delta$ *vrkE* and  $\Delta$ *vrkK* mutants grown in stationary liquid YG culture for 5 days. The compound were extracted from the cultures using equal volume of EtOAc/MeOH/AcOH (89:10:1) twice followed by solvent partitioning using CHCl<sub>3</sub>/H<sub>2</sub>O (CHCl<sub>3</sub> fraction was retained and dried) and 90% MeOH/hexanes (90% MeOH fraction was retained and dried). This is followed by a chromatographic separation on a Sephadex LH-20 column using MeOH/CHCl<sub>3</sub> (1:1) as the mobile phase. Fractions collected were checked by TLC. Additional rounds of chromatographic separation using Sephadex LH-20 column was performed using a hexane/MeOH/CHCl<sub>3</sub> solvent system with decreasing ratio of hexane from 3:1:1 to 1:1:1. Further purification was carried out by reverse-phase HPLC using a Beckman Coulter System Gold LC coupled to a Phenomenex Luna 250  $\times$  10mm 5 micron C18 column and a UV-Vis detector. The compounds were separated on a solvent gradient of 40-80% solvent B (acetonitrile with 0.1% TFA) at a flow rate of 3 ml/min over 30 mins. The HPLC fractions containing pure compounds were pooled and dried completely under vacuum before proceed to NMR analysis.

**NMR characterizations.** All <sup>1</sup>H, <sup>13</sup>C and 2D (HSQC and HMBC) NMR spectra were obtained on a Bruker DRX-500 spectrometer or a Bruker AV500 spectrometer with a 5 mm dual cryoprobe at the UCLA Molecular Instrumentation Center. DMSO-*d*<sub>6</sub> was used as the solvent for all compounds.

**Computation methods.** Calculations were performed with GAUSSIAN09.<sup>7</sup> Geometries were optimized using the B3LYP/6-31+G(d,p) method and all stationary points were characterized as minima or transition state structures using frequency calculations at the same level.<sup>8</sup> All reported energies include zero-point energy corrections (unscaled) from these B3LYP/6-31+G(d,p) frequency calculations. Intrinsic reaction coordinate (IRC) calculations were used for further characterization of transition state structures.<sup>9</sup> mPW1PW91/6-31+G(d,p)//B3LYP/6-31+G(d,p)<sup>10</sup> and MPWB1K/6-31+G(d,p)//B3LYP/6-31+G(d,p)<sup>11</sup> and M06-2X/6-31+G(d,p)//B3LYP/6-31+G(d,p)<sup>12</sup> energies are also shown to correct well-known shortcomings of B3LYP in predicting energies of cyclic structures<sup>10</sup> and dispersion interactions.<sup>12</sup> Truncated small model systems that lead to form 1a and 1a' are used to examine carbocationic rearrangements that begin with a secondary allylic carbocation A and A' resulted from hydrogen abstraction followed by electron transfer of 2a and 2a', respectively (Scheme 3). The numbering for the carbon atoms for model systems and all structures is adopted from that of viridicatumtoxin (**1**). Capital alphabets in bold are used to label carbocations and the following number is used to label different conformers and stereoisomers. The validity of this computational approach for examining terpene-forming carbocation rearrangements is well-established.<sup>13</sup> Structural drawings were created using *Ball & Stick*.<sup>14</sup>

## Supplementary Tables

**Table S1.** List of primers used in this study.

| Primer Name   | Sequence (5' to 3')                                            | Remarks                                                            |
|---------------|----------------------------------------------------------------|--------------------------------------------------------------------|
| VrtE-KO-P1*   | ctactgctgcgttaccagtc                                           | for <i>vrtE</i> deletion cassette                                  |
| VrtE-KO-P2*   | tatactcggccaggctcctgca                                         | for <i>vrtE</i> deletion cassette                                  |
| VrtE-KO-P3*   | ctgcccgtcaccgagatttagctccatccagtgtgcgtgac                      | for <i>vrtE</i> deletion cassette                                  |
| VrtE-KO-P4*   | cttcaatatcatcttctgtcgaaggggtactacaagcatggca                    | for <i>vrtE</i> deletion cassette                                  |
| VrtE-KO-P5*   | caagaatggcgcctggacatc                                          | for <i>vrtE</i> deletion cassette                                  |
| VrtE-KO-P6*   | caggcagctgacgcacaggct                                          | for <i>vrtE</i> deletion cassette                                  |
| VrtK-KO-P1*   | gatgattgcgcccgccatgag                                          | for <i>vrtK</i> deletion cassette                                  |
| VrtK-KO-P2*   | gcctactctatcggccccatc                                          | for <i>vrtK</i> deletion cassette                                  |
| VrtK-KO-P3*   | tgcccgctaccgagatttaggagctccaggtagcaaggt                        | for <i>vrtK</i> deletion cassette                                  |
| VrtK-KO-P4*   | cttcaatatcatcttctgtcgcgggtcccaatgctgtccgac                     | for <i>vrtK</i> deletion cassette                                  |
| VrtK-KO-P5*   | ccactggcctaacggactcag                                          | for <i>vrtK</i> deletion cassette                                  |
| VrtK-KO-P6*   | gtctgtgagccgctagccatgt                                         | for <i>vrtK</i> deletion cassette                                  |
| PtpC-F        | gtcgacagaagatgatattga                                          | for <i>bar</i> resistant marker in deletion cassette               |
| bar-stp-R     | cctaatactcggtagcgggca                                          | for <i>bar</i> resistant marker in deletion cassette               |
| bar-F         | agtaaccatgagcccagaacgac                                        | for screening of targeted homologous recombination                 |
| bar-R         | agaaacccacgtcatgccagttc                                        | for screening of targeted homologous recombination                 |
| pESC-VrtK-F   | gaaaattcgaattcaaccctcactaaagggcgccc<br>atggcttctccacctatctagga | for cloning of <i>vrtK</i> cDNA into pESC-Leu2d-AtCPR              |
| VrtK-RT-F2    | cagtcaagagcgtggcgac                                            | for cloning of <i>vrtK</i> cDNA into pESC-Leu2d-AtCPR              |
| VrtK-RT-R2    | agccgggtgccgacaagtgctc                                         | for cloning of <i>vrtK</i> cDNA into pESC-Leu2d-AtCPR              |
| pESC-VrtK-R   | ttatcgtcgtcatccttgaatccatcgatactag<br>ctttgtgtaatgcgcgcatgac   | for cloning of <i>vrtK</i> cDNA into pESC-Leu2d-AtCPR              |
| pESC-Gal10-iF | ggccgccctttagtgagggttg                                         | for amplification of pESC-Leu2d-AtCPR plasmid as a linear fragment |
| pESC-FLAG-iR  | ctagtatcgatggattacaag                                          | for amplification of pESC-Leu2d-AtCPR plasmid as a linear fragment |

\* The designation of the primers P1 – P6 is following the fusion PCR primer design in Scewczyk et al.<sup>3</sup> as shown in Figure S1.

**Table S2.** NMR data of **3** in DMSO-d<sub>6</sub> measured on 500 MHz Bruker NMR spectrometer and mass spectra

| <b>3</b> , C <sub>19</sub> H <sub>15</sub> NO <sub>9</sub>                                                              |                                |                                                                                                                        |              | <b>anthrotainin</b> <sup>6</sup>                                                                        |                        |
|-------------------------------------------------------------------------------------------------------------------------|--------------------------------|------------------------------------------------------------------------------------------------------------------------|--------------|---------------------------------------------------------------------------------------------------------|------------------------|
| 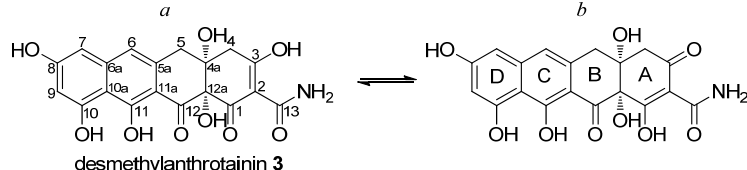 <p>desmethylantrortainin <b>3</b></p> |                                |                                                                                                                        |              |  <p>anthrotainin</p> |                        |
| NO.                                                                                                                     | <sup>13</sup> C δ(ppm)<br>a/b* | <sup>1</sup> H δ(ppm) (m, J <sub>HH</sub> (Hz))<br>a/b*                                                                | HMBC<br>a/b* | <sup>13</sup> C δ(ppm)                                                                                  | <sup>1</sup> H δδ(ppm) |
| <b>1</b>                                                                                                                | 194.3/170.8                    |                                                                                                                        |              | 192.1                                                                                                   |                        |
| <b>2</b>                                                                                                                | 99.7/98.2                      |                                                                                                                        |              | 98.0                                                                                                    |                        |
| <b>3</b>                                                                                                                | 197.99/196.4                   |                                                                                                                        |              | 194.3                                                                                                   |                        |
| <b>4</b>                                                                                                                | 42.1/49.0                      | 2.55 (m)/ 3.15 (m)                                                                                                     |              | 42.1                                                                                                    | 2.84 (s)               |
| <b>4a</b>                                                                                                               | 72.5                           |                                                                                                                        |              | 72.3                                                                                                    |                        |
| <b>5</b>                                                                                                                | 38.3                           | 2.79 (m), 3.38 (m)                                                                                                     |              | 37.9                                                                                                    | 3.41 (br s)            |
| <b>5a</b>                                                                                                               | 135.0                          |                                                                                                                        |              | 135.4                                                                                                   |                        |
| <b>6</b>                                                                                                                | 117.0                          | 6.8 (s, 1H)                                                                                                            | 7H           | 117.5                                                                                                   | 6.9 (s)                |
| <b>a</b>                                                                                                                | 141.5                          |                                                                                                                        |              | 141.4                                                                                                   |                        |
| <b>7</b>                                                                                                                | 102.3                          | 6.47 (s, 1H)                                                                                                           | 9H           | 99.5                                                                                                    | 6.49 (d, 2.0)          |
| <b>8</b>                                                                                                                | 162.4                          |                                                                                                                        | 9H           | 163.2                                                                                                   |                        |
| <b>9</b>                                                                                                                | 102.0                          | 6.33 (s, 1H)                                                                                                           | 7H           | 101.1                                                                                                   | 6.55 (d, 2.0)          |
| <b>10</b>                                                                                                               | 159.8                          |                                                                                                                        | 9H           | 159.3                                                                                                   |                        |
| <b>10a</b>                                                                                                              | 106.3                          |                                                                                                                        | 7H, 9H       | 108.2                                                                                                   |                        |
| <b>11</b>                                                                                                               | 167.1                          |                                                                                                                        |              | 166.7                                                                                                   |                        |
| <b>11a</b>                                                                                                              | 107.6                          |                                                                                                                        |              | 106.8                                                                                                   |                        |
| <b>12</b>                                                                                                               | 200.8                          |                                                                                                                        |              | 196.6                                                                                                   |                        |
| <b>12a</b>                                                                                                              | 82.1/81.0                      |                                                                                                                        |              | 82.1                                                                                                    |                        |
| <b>13</b>                                                                                                               | 173.79                         |                                                                                                                        |              | 173.5                                                                                                   |                        |
| <b>13-NH<sub>2</sub></b>                                                                                                |                                | 8.83 (br s, 1H),<br>9.03 (br s, 1H)                                                                                    |              |                                                                                                         | 9.01 (s)               |
| <b>8-OCH<sub>3</sub></b>                                                                                                | -                              | -                                                                                                                      | -            | 55.6                                                                                                    | 3.87 (s)               |
| <b>OH's</b>                                                                                                             |                                | 5.65 (br s, 1H), 9.81 (br<br>s, 1H), 10.3 (br s, 1H),<br>14.7 (br s, 1H),<br>14.95/14.7 (br s, 1H),<br>18.2 (br s, 1H) |              |                                                                                                         |                        |

\* The additional carbon and proton signals appear to correlate with the 1,3 keto-enol tautomerization occurs at the A-ring. Similar to desmethyl-TAN-1612, **3** is highly unstable and decomposed gradually in DMSO and in light. The <sup>1</sup>H and <sup>13</sup>C-NMR data of anthrotainin in DMSO-d<sub>6</sub> from previous report<sup>6</sup> is shown here for comparison. <sup>1</sup>H and <sup>13</sup>C-NMR spectra of **2** are shown in **Figure S3** and **S4**.

**Table S3.** NMR data of **2** in DMSO-d<sub>6</sub> measured on 500 MHz Bruker NMR spectrometer and mass spectrum.

| <b>2</b> , C <sub>30</sub> H <sub>33</sub> NO <sub>10</sub> (MW = 567.58)                                                                          |                        |                                                                                           |                                                                               |
|----------------------------------------------------------------------------------------------------------------------------------------------------|------------------------|-------------------------------------------------------------------------------------------|-------------------------------------------------------------------------------|
| 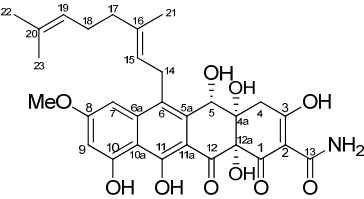 <p style="text-align: center;">previridicatumtoxin, <b>2</b></p> |                        |                                                                                           |                                                                               |
| NO.                                                                                                                                                | <sup>13</sup> C δ(ppm) | <sup>1</sup> H δ(ppm) (mult, J <sub>HH</sub> (Hz))                                        | HMBC                                                                          |
| <b>1</b>                                                                                                                                           | 192.2                  |                                                                                           |                                                                               |
| <b>2</b>                                                                                                                                           | 99.57                  |                                                                                           |                                                                               |
| <b>3</b>                                                                                                                                           | 195.3                  |                                                                                           |                                                                               |
| <b>4</b>                                                                                                                                           | 41.9                   | 2.71 (1H, d, 17.5)<br>2.80 (1H, d, 17.5)                                                  |                                                                               |
| <b>4a</b>                                                                                                                                          | 73.2                   |                                                                                           | 5-H                                                                           |
| <b>5</b>                                                                                                                                           | 70.8                   | 4.75 (1H, brs)                                                                            | 6-H                                                                           |
| <b>5a</b>                                                                                                                                          | 134.5                  |                                                                                           | 5-H, 14-H <sub>2</sub>                                                        |
| <b>6</b>                                                                                                                                           | 129.1                  |                                                                                           | 7-H, 14-H <sub>2</sub> , 15-H                                                 |
| <b>6a</b>                                                                                                                                          | 141.4                  |                                                                                           | 6-H                                                                           |
| <b>7</b>                                                                                                                                           | 99.1                   | 6.82 (1H, d, 1.9)                                                                         | 9-H                                                                           |
| <b>8</b>                                                                                                                                           | 164.0                  |                                                                                           | 7-H, 9-H, 8-OCH <sub>3</sub>                                                  |
| <b>9</b>                                                                                                                                           | 102.2                  | 6.60 (1H, d, 1.9)                                                                         | 7-H                                                                           |
| <b>10</b>                                                                                                                                          | 160.6                  |                                                                                           | 9-H                                                                           |
| <b>10a</b>                                                                                                                                         | 109.2                  |                                                                                           | 7-H, 9-H                                                                      |
| <b>11</b>                                                                                                                                          | 165.2                  |                                                                                           |                                                                               |
| <b>11a</b>                                                                                                                                         | 106.4                  |                                                                                           | 6-H                                                                           |
| <b>12</b>                                                                                                                                          | 199.4                  |                                                                                           |                                                                               |
| <b>12a</b>                                                                                                                                         | 81.6                   |                                                                                           | 5-H                                                                           |
| <b>13</b>                                                                                                                                          | 173.8                  |                                                                                           |                                                                               |
| <b>14</b>                                                                                                                                          | 28.3                   | 3.67 (1H, dd, 4.4/16)<br>3.77 (1H, dd, 6.8/16)                                            | 15-H                                                                          |
| <b>15</b>                                                                                                                                          | 124.9                  | 5.03 (1H, m)                                                                              | 14-H <sub>2</sub> , 17-H <sub>2</sub> , 21-H <sub>3</sub>                     |
| <b>16</b>                                                                                                                                          | 135.4                  |                                                                                           | 14-H <sub>2</sub> , 15-H, 17-H, 21-H <sub>3</sub>                             |
| <b>17</b>                                                                                                                                          | 40.1                   | 2.01(2H, m)                                                                               | 21-H <sub>3</sub> , 18-H <sub>2</sub>                                         |
| <b>18</b>                                                                                                                                          | 26.9                   | 2.05 (2H, m)                                                                              | 17-H <sub>2</sub> , 19-H                                                      |
| <b>19</b>                                                                                                                                          | 124.9                  | 5.14 (1H, t, 5.8 )                                                                        | 17-H <sub>2</sub> , 18-H <sub>2</sub> , 22-H <sub>3</sub> , 23-H <sub>3</sub> |
| <b>20</b>                                                                                                                                          | 131.7                  |                                                                                           | 22-H <sub>3</sub> , 23-H <sub>3</sub>                                         |
| <b>21</b>                                                                                                                                          | 17.1                   | 1.87 (3H, s)                                                                              | 15-H, 17-H <sub>2</sub>                                                       |
| <b>22</b>                                                                                                                                          | 18.5                   | 1.54 (3H, s)                                                                              | 19-H, 23-H <sub>3</sub>                                                       |
| <b>23</b>                                                                                                                                          | 26.3                   | 1.57 (3H, s)                                                                              | 19-H, 22-H <sub>3</sub>                                                       |
| <b>8-OCH3</b>                                                                                                                                      | 56.3                   | 3.9 (3H, s)                                                                               |                                                                               |
| <b>13-NH<sub>2</sub></b>                                                                                                                           |                        | 8.99 (2H, brs)                                                                            |                                                                               |
| <b>-OH's</b>                                                                                                                                       |                        | 5.29 (1H, brs), 5.73(1H, brs), 7.01(1H,s) 10.1 (1H, s), 15.26 (1H, brs), 18.22 (1H, brs), |                                                                               |

<sup>1</sup>H and <sup>13</sup>C-NMR spectra of **2** are shown in **Figure S5** and **S6**.



**Table S4 (i).** Coordinates and Energies. Path 1: **A1**→**D1**

*The coordinates below are those for the enantiomer of the structure presented in the main paper and Figure S10 (i).*

**A1**

B3LYP/6-31+G(d,p)//B3LYP/6-31+G(d,p):

HF = -890.2902722 hartrees (-558666.048708222 kcal/mol)

Imaginary Frequencies: none found

Zero-point correction = 0.403251 (Hartree/Particle)

Coordinates (from last standard orientation):

-----

| Center<br>Number | Atomic<br>Number | Coordinates (Angstroms) |           |           |
|------------------|------------------|-------------------------|-----------|-----------|
|                  |                  | X                       | Y         | Z         |
| 1                | 6                | 2.005680                | 1.774219  | -1.125771 |
| 2                | 6                | 1.373368                | 2.914706  | -0.788426 |
| 3                | 6                | 1.814560                | -0.561097 | 0.907947  |
| 4                | 6                | 3.171858                | -0.768132 | 0.578903  |
| 5                | 6                | 3.853180                | 0.174279  | -0.174625 |
| 6                | 6                | 3.448674                | 1.427903  | -0.878547 |
| 7                | 1                | 1.457222                | 1.047484  | -1.725494 |
| 8                | 1                | 4.924865                | -0.008153 | -0.264809 |
| 9                | 1                | 3.980462                | 2.240217  | -0.358440 |
| 10               | 1                | 3.976808                | 1.379460  | -1.848076 |
| 11               | 6                | 1.981122                | 4.043142  | 0.006746  |
| 12               | 1                | 1.998407                | 4.961412  | -0.593034 |
| 13               | 1                | 1.366608                | 4.261915  | 0.888709  |
| 14               | 1                | 2.999454                | 3.850810  | 0.350838  |
| 15               | 6                | -0.053138               | 3.152259  | -1.221290 |
| 16               | 1                | -0.702312               | 3.317669  | -0.352277 |
| 17               | 1                | -0.120053               | 4.056515  | -1.838902 |
| 18               | 1                | -0.453395               | 2.314894  | -1.798719 |
| 19               | 6                | 0.964176                | -1.447776 | 1.726765  |
| 20               | 1                | 0.393239                | -0.913301 | 2.490111  |
| 21               | 1                | 1.502116                | -2.271472 | 2.194802  |
| 22               | 6                | 0.072034                | -1.928676 | 0.582541  |
| 23               | 6                | -1.151903               | -1.243239 | 0.248515  |
| 24               | 6                | 0.466428                | -3.047908 | -0.153995 |
| 25               | 6                | -1.615507               | -0.101887 | 0.930885  |
| 26               | 6                | -1.949396               | -1.778809 | -0.823721 |
| 27               | 6                | -0.324596               | -3.559946 | -1.194137 |
| 28               | 1                | 1.388570                | -3.557805 | 0.107820  |
| 29               | 6                | -2.825149               | 0.502011  | 0.588347  |
| 30               | 6                | -3.176488               | -1.141389 | -1.145077 |

|    |   |           |           |           |
|----|---|-----------|-----------|-----------|
| 31 | 6 | -1.512313 | -2.928605 | -1.523335 |
| 32 | 1 | -0.007372 | -4.449887 | -1.726811 |
| 33 | 6 | -3.615944 | -0.027472 | -0.463795 |
| 34 | 1 | -3.784072 | -1.553997 | -1.945442 |
| 35 | 1 | -2.129922 | -3.316361 | -2.328756 |
| 36 | 1 | -4.559466 | 0.430514  | -0.733209 |
| 37 | 6 | 3.931978  | -1.958328 | 1.134960  |
| 38 | 1 | 3.853728  | -2.013595 | 2.225187  |
| 39 | 1 | 3.554214  | -2.901469 | 0.727535  |
| 40 | 1 | 4.992266  | -1.897694 | 0.881874  |
| 41 | 8 | -3.163738 | 1.591623  | 1.312391  |
| 42 | 6 | -4.424293 | 2.235308  | 1.082292  |
| 43 | 1 | -5.254948 | 1.544365  | 1.259640  |
| 44 | 1 | -4.468155 | 3.050450  | 1.803475  |
| 45 | 1 | -4.479970 | 2.640984  | 0.066530  |
| 46 | 1 | -1.055470 | 0.346885  | 1.742797  |
| 47 | 1 | 1.331089  | 0.323803  | 0.504437  |

-----

mPW1PW91/6-31+G(d,p)//B3LYP/6-31+G(d,p):

HF = -890.0724437 hartrees (-558529.359146187 kcal/mol)

MPWB1K/6-31+G(d,p)//B3LYP/6-31+G(d,p):

HF = -889.7964618 hartrees (-558356.177744118 kcal/mol)

M06-2X/6-31+G(d,p)//B3LYP/6-31+G(d,p):

HF = -889.856413105 hartrees (-558393.7978 kcal/mol)

### TS<sub>A1-E1</sub>

B3LYP/6-31+G(d,p)//B3LYP/6-31+G(d,p):

HF = -890.2768129 hartrees (-558657.602862879 kcal/mol)

Imaginary Frequencies: 1 (-86.0078 1/cm)

Zero-point correction = 0.403428 (Hartree/Particle)

Coordinates (from last standard orientation):

-----

| Center<br>Number | Atomic<br>Number | Coordinates (Angstroms) |           |           |
|------------------|------------------|-------------------------|-----------|-----------|
|                  |                  | X                       | Y         | Z         |
| 1                | 6                | 0.871226                | 0.738550  | -1.087576 |
| 2                | 1                | 0.663952                | -0.176153 | -1.651082 |
| 3                | 1                | 1.509983                | 1.375366  | -1.702272 |
| 4                | 6                | -0.434416               | 1.445196  | -0.727176 |
| 5                | 6                | -1.589227               | 0.686245  | -0.322740 |
| 6                | 6                | -0.508710               | 2.830435  | -0.796370 |
| 7                | 6                | -1.609464               | -0.724802 | -0.254384 |

S10

|    |   |           |           |           |
|----|---|-----------|-----------|-----------|
| 8  | 6 | -2.789226 | 1.405774  | 0.009601  |
| 9  | 6 | -1.696846 | 3.523441  | -0.487252 |
| 10 | 1 | 0.356598  | 3.396250  | -1.127434 |
| 11 | 6 | -2.752228 | -1.415344 | 0.134000  |
| 12 | 6 | -3.937810 | 0.670322  | 0.403481  |
| 13 | 6 | -2.812066 | 2.820331  | -0.078720 |
| 14 | 1 | -1.727165 | 4.604321  | -0.574740 |
| 15 | 6 | -3.933473 | -0.705523 | 0.472008  |
| 16 | 1 | -4.844895 | 1.214804  | 0.650020  |
| 17 | 1 | -3.729069 | 3.345735  | 0.173053  |
| 18 | 1 | -4.830416 | -1.231497 | 0.774338  |
| 19 | 8 | -2.646718 | -2.767464 | 0.161458  |
| 20 | 6 | -3.789475 | -3.556882 | 0.512167  |
| 21 | 1 | -4.612851 | -3.392079 | -0.190948 |
| 22 | 1 | -3.458107 | -4.592722 | 0.446816  |
| 23 | 1 | -4.118658 | -3.342715 | 1.534710  |
| 24 | 1 | -0.743318 | -1.320813 | -0.517387 |
| 25 | 6 | 2.642778  | -1.596863 | 0.651640  |
| 26 | 6 | 3.002267  | -1.725518 | -0.668108 |
| 27 | 6 | 1.497239  | 0.420060  | 0.233674  |
| 28 | 6 | 2.545951  | 1.208595  | 0.882130  |
| 29 | 6 | 3.441955  | 0.560366  | 1.659040  |
| 30 | 6 | 3.502255  | -0.945736 | 1.718060  |
| 31 | 1 | 1.777290  | -2.162390 | 0.988353  |
| 32 | 1 | 4.197336  | 1.121468  | 2.203829  |
| 33 | 1 | 4.549310  | -1.261218 | 1.624834  |
| 34 | 1 | 3.183783  | -1.287616 | 2.712702  |
| 35 | 6 | 4.271861  | -1.136855 | -1.209834 |
| 36 | 1 | 5.093769  | -1.851899 | -1.060191 |
| 37 | 1 | 4.203961  | -0.948911 | -2.284677 |
| 38 | 1 | 4.556980  | -0.212300 | -0.700094 |
| 39 | 6 | 2.172449  | -2.535506 | -1.618336 |
| 40 | 1 | 1.898797  | -1.953911 | -2.507806 |
| 41 | 1 | 2.770047  | -3.379754 | -1.988299 |
| 42 | 1 | 1.268011  | -2.937776 | -1.156306 |
| 43 | 6 | 2.633998  | 2.703533  | 0.644699  |
| 44 | 1 | 2.773192  | 2.933274  | -0.417064 |
| 45 | 1 | 1.727615  | 3.215025  | 0.980197  |
| 46 | 1 | 3.486230  | 3.116323  | 1.187917  |
| 47 | 1 | 0.847141  | -0.150005 | 0.889841  |

-----  
mPW1PW91/6-31+G(d,p)//B3LYP/6-31+G(d,p):  
HF = -890.0620826 hartrees (-558522.857452326 kcal/mol)

MPWB1K/6-31+G(d,p)//B3LYP/6-31+G(d,p):

HF = -889.7887715 hartrees (-558351.352003965 kcal/mol)

M06-2X/6-31+G(d,p)//B3LYP/6-31+G(d,p):

HF = -889.8564131hartrees (-558393.7978 kcal/mol)

### E1

B3LYP/6-31+G(d,p)//B3LYP/6-31+G(d,p):

HF = -890.2871295 hartrees (-558664.076632545 kcal/mol)

Imaginary Frequencies: none found

Zero-point correction = 0.404377 (Hartree/Particle)

Coordinates (from last standard orientation):

-----

| Center<br>Number | Atomic<br>Number | Coordinates (Angstroms) |           |           |
|------------------|------------------|-------------------------|-----------|-----------|
|                  |                  | X                       | Y         | Z         |
| 1                | 6                | -2.339085               | 1.090225  | 0.283067  |
| 2                | 6                | -3.187770               | 1.354517  | -0.865791 |
| 3                | 6                | -1.521209               | -0.227082 | 0.452620  |
| 4                | 6                | -2.456764               | -1.166828 | 1.207122  |
| 5                | 6                | -3.543492               | -0.521812 | 1.661431  |
| 6                | 6                | -3.571356               | 0.941131  | 1.342858  |
| 7                | 1                | -1.751495               | 1.974183  | 0.535498  |
| 8                | 1                | -4.339621               | -0.976608 | 2.243179  |
| 9                | 1                | -4.551762               | 1.285085  | 0.980112  |
| 10               | 1                | -3.315025               | 1.606065  | 2.176317  |
| 11               | 6                | -3.888754               | 0.280400  | -1.605240 |
| 12               | 1                | -4.827537               | 0.622378  | -2.046632 |
| 13               | 1                | -3.231537               | -0.021399 | -2.435828 |
| 14               | 1                | -4.036489               | -0.613226 | -0.992130 |
| 15               | 6                | -3.402148               | 2.757849  | -1.292815 |
| 16               | 1                | -4.420600               | 2.944777  | -1.643340 |
| 17               | 1                | -3.104384               | 3.488736  | -0.538410 |
| 18               | 1                | -2.741805               | 2.911674  | -2.165120 |
| 19               | 6                | -0.876560               | -0.757609 | -0.871098 |
| 20               | 1                | -0.775035               | 0.089869  | -1.564113 |
| 21               | 1                | -1.550606               | -1.473372 | -1.351959 |
| 22               | 6                | 0.475652                | -1.408840 | -0.686378 |
| 23               | 6                | 1.627700                | -0.619861 | -0.339317 |
| 24               | 6                | 0.623652                | -2.773535 | -0.867703 |
| 25               | 6                | 1.586455                | 0.788559  | -0.198900 |
| 26               | 6                | 2.884893                | -1.287412 | -0.142150 |
| 27               | 6                | 1.865357                | -3.424895 | -0.685843 |
| 28               | 1                | -0.237808               | -3.367786 | -1.162019 |
| 29               | 6                | 2.718050                | 1.518911  | 0.138492  |
| 30               | 6                | 4.021060                | -0.512017 | 0.206325  |

S12

|    |   |           |           |           |
|----|---|-----------|-----------|-----------|
| 31 | 6 | 2.972747  | -2.693577 | -0.317299 |
| 32 | 1 | 1.937225  | -4.497134 | -0.836387 |
| 33 | 6 | 3.954217  | 0.857255  | 0.351201  |
| 34 | 1 | 4.970477  | -1.018343 | 0.356550  |
| 35 | 1 | 3.931379  | -3.182344 | -0.167108 |
| 36 | 1 | 4.845001  | 1.412894  | 0.616572  |
| 37 | 6 | -2.117192 | -2.600384 | 1.471857  |
| 38 | 1 | -2.014231 | -3.170812 | 0.542664  |
| 39 | 1 | -1.155666 | -2.680352 | 1.992061  |
| 40 | 1 | -2.884077 | -3.079570 | 2.084817  |
| 41 | 8 | 2.550185  | 2.866373  | 0.241853  |
| 42 | 6 | 3.677839  | 3.688357  | 0.555480  |
| 43 | 1 | 4.457397  | 3.600426  | -0.209354 |
| 44 | 1 | 3.299569  | 4.710360  | 0.570783  |
| 45 | 1 | 4.089740  | 3.438211  | 1.539544  |
| 46 | 1 | -0.689766 | 0.016518  | 1.126599  |
| 47 | 1 | 0.675413  | 1.348677  | -0.374632 |

-----

mPW1PW91/6-31+G(d,p)//B3LYP/6-31+G(d,p):

HF = -890.0796788 hartrees (-558533.899243788 kcal/mol)

MPWB1K/6-31+G(d,p)//B3LYP/6-31+G(d,p):

HF = -889.8109502 hartrees (-558365.269360002 kcal/mol)

M06-2X/6-31+G(d,p)//B3LYP/6-31+G(d,p):

HF = -889.870561203 hartrees (-558402.6759 kcal/mol)

**TS** <sub>E1-c1</sub>

B3LYP/6-31+G(d,p)//B3LYP/6-31+G(d,p):

HF = -890.2605113 hartrees (-558647.373445863 kcal/mol)

Imaginary Frequencies: 1 (-290.7141 1/cm)

Zero-point correction = 0.403653 (Hartree/Particle)

Coordinates (from last standard orientation):

-----

| Center<br>Number | Atomic<br>Number | Coordinates (Angstroms) |           |           |
|------------------|------------------|-------------------------|-----------|-----------|
|                  |                  | X                       | Y         | Z         |
| 1                | 6                | 1.935957                | -1.695185 | 0.385274  |
| 2                | 6                | 2.790205                | -1.107947 | -0.679148 |
| 3                | 6                | 1.814108                | 0.050529  | -0.202694 |
| 4                | 6                | 2.329349                | 0.761873  | 1.049521  |
| 5                | 6                | 2.546517                | -0.064925 | 2.080814  |
| 6                | 6                | 2.262148                | -1.532989 | 1.847548  |
| 7                | 1                | 1.168966                | -2.407028 | 0.079498  |

S13

|    |   |           |           |           |
|----|---|-----------|-----------|-----------|
| 8  | 1 | 2.937990  | 0.263182  | 3.037632  |
| 9  | 1 | 3.154737  | -2.140105 | 2.062107  |
| 10 | 1 | 1.455898  | -1.916391 | 2.482893  |
| 11 | 6 | 4.289095  | -0.920661 | -0.449151 |
| 12 | 1 | 4.790522  | -1.888786 | -0.539488 |
| 13 | 1 | 4.697881  | -0.268327 | -1.226198 |
| 14 | 1 | 4.539851  | -0.493853 | 0.520696  |
| 15 | 6 | 2.521195  | -1.684540 | -2.073592 |
| 16 | 1 | 2.844108  | -0.989721 | -2.853556 |
| 17 | 1 | 3.099525  | -2.605613 | -2.193899 |
| 18 | 1 | 1.470420  | -1.932463 | -2.245229 |
| 19 | 6 | 1.013919  | 0.812264  | -1.302182 |
| 20 | 1 | 0.785983  | 0.121564  | -2.116115 |
| 21 | 1 | 1.723503  | 1.541611  | -1.709247 |
| 22 | 6 | -0.239545 | 1.517480  | -0.827420 |
| 23 | 6 | -1.385846 | 0.765007  | -0.403549 |
| 24 | 6 | -0.291996 | 2.899554  | -0.809774 |
| 25 | 6 | -1.460806 | -0.648717 | -0.488559 |
| 26 | 6 | -2.518778 | 1.476055  | 0.119924  |
| 27 | 6 | -1.427224 | 3.598498  | -0.334909 |
| 28 | 1 | 0.561778  | 3.471014  | -1.165661 |
| 29 | 6 | -2.572076 | -1.347157 | -0.034962 |
| 30 | 6 | -3.637118 | 0.731304  | 0.577206  |
| 31 | 6 | -2.509678 | 2.896216  | 0.143958  |
| 32 | 1 | -1.430275 | 4.683444  | -0.339475 |
| 33 | 6 | -3.672905 | -0.645579 | 0.520220  |
| 34 | 1 | -4.491469 | 1.269828  | 0.977618  |
| 35 | 1 | -3.377853 | 3.419759  | 0.534265  |
| 36 | 1 | -4.546135 | -1.175946 | 0.879358  |
| 37 | 6 | 2.610306  | 2.236345  | 1.046448  |
| 38 | 1 | 3.286192  | 2.509729  | 0.227028  |
| 39 | 1 | 1.695019  | 2.821352  | 0.927628  |
| 40 | 1 | 3.083959  | 2.528780  | 1.986004  |
| 41 | 8 | -2.521524 | -2.699866 | -0.170214 |
| 42 | 6 | -3.673026 | -3.481485 | 0.169267  |
| 43 | 1 | -4.541895 | -3.180582 | -0.425557 |
| 44 | 1 | -3.407694 | -4.510833 | -0.070228 |
| 45 | 1 | -3.903887 | -3.403597 | 1.237330  |
| 46 | 1 | 0.927789  | -0.585785 | 0.282743  |
| 47 | 1 | -0.695510 | -1.227934 | -0.993884 |

-----  
mPW1PW91/6-31+G(d,p)//B3LYP/6-31+G(d,p):  
HF = -890.0598432 hartrees (-558521.452206432 kcal/mol)

MPWB1K/6-31+G(d,p)//B3LYP/6-31+G(d,p):

HF = -889.7944069 hartrees (-558354.888273819 kcal/mol)

M06-2X/6-31+G(d,p)//B3LYP/6-31+G(d,p):

HF = -889.855047 hartrees (-558392.9405 kcal/mol)

### C1

B3LYP/6-31+G(d,p)//B3LYP/6-31+G(d,p):

HF = -890.3109557 hartrees (-558679.027811307 kcal/mol)

Imaginary Frequencies: none found

Zero-point correction = 0.406103 (Hartree/Particle)

Coordinates (from last standard orientation):

-----

| Center<br>Number | Atomic<br>Number | Coordinates (Angstroms) |           |           |
|------------------|------------------|-------------------------|-----------|-----------|
|                  |                  | X                       | Y         | Z         |
| 1                | 6                | -3.040189               | 1.509532  | -0.002495 |
| 2                | 6                | -2.699885               | 0.270357  | -0.862614 |
| 3                | 6                | -1.717616               | -0.633941 | -0.131178 |
| 4                | 6                | -1.780589               | -0.769349 | 1.290123  |
| 5                | 6                | -2.627490               | 0.061084  | 1.994953  |
| 6                | 6                | -3.431903               | 1.163712  | 1.431256  |
| 7                | 1                | -3.843853               | 2.067395  | -0.492043 |
| 8                | 1                | -2.734265               | -0.122650 | 3.063734  |
| 9                | 1                | -4.489161               | 0.853310  | 1.511219  |
| 10               | 1                | -3.363329               | 2.035086  | 2.096233  |
| 11               | 6                | -3.972024               | -0.620448 | -1.091202 |
| 12               | 1                | -4.710691               | -0.021327 | -1.632675 |
| 13               | 1                | -3.738801               | -1.495311 | -1.704327 |
| 14               | 1                | -4.420596               | -0.966153 | -0.156616 |
| 15               | 6                | -2.224539               | 0.767472  | -2.247437 |
| 16               | 1                | -2.152655               | -0.034438 | -2.985451 |
| 17               | 1                | -2.962017               | 1.480750  | -2.626507 |
| 18               | 1                | -1.262659               | 1.284893  | -2.197878 |
| 19               | 6                | -0.827576               | -1.532629 | -0.932155 |
| 20               | 1                | -0.874579               | -1.255572 | -1.986194 |
| 21               | 1                | -1.301858               | -2.526933 | -0.861585 |
| 22               | 6                | 0.634075                | -1.714919 | -0.517840 |
| 23               | 6                | 1.495376                | -0.593853 | -0.267798 |
| 24               | 6                | 1.152945                | -2.997363 | -0.489309 |
| 25               | 6                | 1.057428                | 0.749781  | -0.281732 |
| 26               | 6                | 2.884010                | -0.852244 | 0.010121  |
| 27               | 6                | 2.517887                | -3.243157 | -0.218150 |
| 28               | 1                | 0.501366                | -3.844455 | -0.689846 |
| 29               | 6                | 1.922930                | 1.806578  | -0.044217 |
| 30               | 6                | 3.744674                | 0.250188  | 0.253849  |

|    |   |           |           |           |
|----|---|-----------|-----------|-----------|
| 31 | 6 | 3.365483  | -2.186761 | 0.031353  |
| 32 | 1 | 2.888081  | -4.262956 | -0.213001 |
| 33 | 6 | 3.291795  | 1.550881  | 0.230135  |
| 34 | 1 | 4.792769  | 0.053762  | 0.461246  |
| 35 | 1 | 4.416435  | -2.361682 | 0.243377  |
| 36 | 1 | 3.982112  | 2.364090  | 0.417191  |
| 37 | 6 | -1.017924 | -1.839375 | 2.044530  |
| 38 | 1 | -1.135342 | -2.824259 | 1.584737  |
| 39 | 1 | 0.052245  | -1.623355 | 2.080658  |
| 40 | 1 | -1.386504 | -1.904650 | 3.070790  |
| 41 | 8 | 1.374582  | 3.050970  | -0.089775 |
| 42 | 6 | 2.216533  | 4.193656  | 0.097228  |
| 43 | 1 | 2.999409  | 4.236685  | -0.667643 |
| 44 | 1 | 1.561732  | 5.058559  | -0.005879 |
| 45 | 1 | 2.666999  | 4.194745  | 1.095871  |
| 46 | 1 | 0.023368  | 1.000879  | -0.487967 |
| 47 | 1 | -2.165245 | 2.170617  | 0.016231  |

-----

mPW1PW91/6-31+G(d,p)//B3LYP/6-31+G(d,p):

HF = -890.1034744 hartrees (-558548.831220744 kcal/mol)

MPWB1K/6-31+G(d,p)//B3LYP/6-31+G(d,p):

HF = -889.8347584 hartrees (-558380.209243584 kcal/mol)

M06-2X/6-31+G(d,p)//B3LYP/6-31+G(d,p):

HF = -889.897325 hartrees (-558419.4704 kcal/mol)

**TS** c1-d1

B3LYP/6-31+G(d,p)//B3LYP/6-31+G(d,p):

HF = -890.2969743 hartrees (-558670.254342993 kcal/mol)

Imaginary Frequencies: 1 (-254.1549 1/cm)

Zero-point correction = 0.407105 (Hartree/Particle)

Coordinates (from last standard orientation):

-----

| Center<br>Number | Atomic<br>Number | Coordinates (Angstroms) |           |           |
|------------------|------------------|-------------------------|-----------|-----------|
|                  |                  | X                       | Y         | Z         |
| 1                | 6                | -3.123840               | 0.346593  | -0.069968 |
| 2                | 6                | -2.285369               | -0.739656 | -0.778356 |
| 3                | 6                | -0.930786               | -0.932877 | -0.052762 |
| 4                | 6                | -0.958606               | -0.860679 | 1.418944  |
| 5                | 6                | -2.076479               | -0.427940 | 2.062979  |
| 6                | 6                | -3.325192               | 0.064210  | 1.416658  |
| 7                | 1                | -4.091127               | 0.432909  | -0.576128 |

S16



|    |   |           |           |           |
|----|---|-----------|-----------|-----------|
| 8  | 1 | -2.080317 | -0.477851 | 3.150732  |
| 9  | 1 | -4.114687 | -0.685885 | 1.582588  |
| 10 | 1 | -3.679516 | 0.960169  | 1.942346  |
| 11 | 6 | -3.013044 | -2.120990 | -0.700054 |
| 12 | 1 | -4.030535 | -2.003643 | -1.085476 |
| 13 | 1 | -2.513795 | -2.873412 | -1.316272 |
| 14 | 1 | -3.077747 | -2.506052 | 0.320506  |
| 15 | 6 | -2.191779 | -0.357038 | -2.271509 |
| 16 | 1 | -1.531470 | -1.005840 | -2.853788 |
| 17 | 1 | -3.187207 | -0.440559 | -2.717533 |
| 18 | 1 | -1.876478 | 0.682418  | -2.410573 |
| 19 | 6 | 0.011097  | -1.981176 | -0.687644 |
| 20 | 1 | -0.261466 | -2.120872 | -1.737643 |
| 21 | 1 | -0.156733 | -2.945245 | -0.192514 |
| 22 | 6 | 1.459263  | -1.561422 | -0.567120 |
| 23 | 6 | 1.616636  | -0.170598 | -0.464673 |
| 24 | 6 | 2.566970  | -2.383114 | -0.436807 |
| 25 | 6 | 0.430410  | 0.635727  | -0.639976 |
| 26 | 6 | 2.852443  | 0.390377  | -0.057542 |
| 27 | 6 | 3.835678  | -1.825041 | -0.149408 |
| 28 | 1 | 2.464984  | -3.462470 | -0.510603 |
| 29 | 6 | 0.490557  | 1.999538  | -0.226306 |
| 30 | 6 | 2.850771  | 1.767584  | 0.301694  |
| 31 | 6 | 3.976974  | -0.466477 | 0.071547  |
| 32 | 1 | 4.693522  | -2.481691 | -0.048458 |
| 33 | 6 | 1.702352  | 2.540911  | 0.267935  |
| 34 | 1 | 3.775959  | 2.220116  | 0.649567  |
| 35 | 1 | 4.935388  | -0.053149 | 0.371404  |
| 36 | 1 | 1.754844  | 3.578356  | 0.573319  |
| 37 | 6 | 0.222779  | -1.321867 | 2.245805  |
| 38 | 1 | 0.541855  | -2.337053 | 1.990455  |
| 39 | 1 | 1.094033  | -0.672763 | 2.112617  |
| 40 | 1 | -0.037284 | -1.312679 | 3.306519  |
| 41 | 8 | -0.616525 | 2.721914  | -0.422742 |
| 42 | 6 | -0.614712 | 4.145375  | -0.186504 |
| 43 | 1 | 0.134569  | 4.636340  | -0.813654 |
| 44 | 1 | -1.611291 | 4.482093  | -0.467006 |
| 45 | 1 | -0.434405 | 4.360008  | 0.870434  |
| 46 | 1 | -0.140845 | 0.494104  | -1.551851 |
| 47 | 1 | -2.614791 | 1.308691  | -0.188657 |

-----  
mPW1PW91/6-31+G(d,p)//B3LYP/6-31+G(d,p):  
HF = -890.0938125 hartrees (-558542.768281875 kcal/mol)

MPWB1K/6-31+G(d,p)//B3LYP/6-31+G(d,p):

HF = -889.825113 hartrees (-558374.15665863 kcal/mol)

M06-2X/6-31+G(d,p)//B3LYP/6-31+G(d,p):

HF = -889.8881748 hartrees (-558413.7286 kcal/mol)

### D1

B3LYP/6-31+G(d,p)//B3LYP/6-31+G(d,p):

HF = -890.3106132 hartrees (-558678.812889132 kcal/mol)

Imaginary Frequencies: none found

Zero-point correction = 0.408792 (Hartree/Particle)

Coordinates (from last standard orientation):

```
-----
```

| Center<br>Number | Atomic<br>Number | Coordinates (Angstroms) |           |           |
|------------------|------------------|-------------------------|-----------|-----------|
|                  |                  | X                       | Y         | Z         |
| 1                | 6                | -3.119072               | 0.005072  | -0.482653 |
| 2                | 6                | -2.027568               | -1.026077 | -0.848302 |
| 3                | 6                | -0.707122               | -0.782818 | -0.001078 |
| 4                | 6                | -1.021154               | -0.460089 | 1.465582  |
| 5                | 6                | -2.258823               | -0.127936 | 1.874247  |
| 6                | 6                | -3.475876               | -0.019339 | 1.005296  |
| 7                | 1                | -4.009612               | -0.202483 | -1.086833 |
| 8                | 1                | -2.407612               | 0.064227  | 2.936244  |
| 9                | 1                | -4.152717               | -0.855652 | 1.233119  |
| 10               | 1                | -4.040102               | 0.881945  | 1.277192  |
| 11               | 6                | -2.586171               | -2.441685 | -0.533317 |
| 12               | 1                | -3.596409               | -2.530917 | -0.944859 |
| 13               | 1                | -1.988752               | -3.236536 | -0.987102 |
| 14               | 1                | -2.646014               | -2.637472 | 0.540497  |
| 15               | 6                | -1.783756               | -0.944535 | -2.369282 |
| 16               | 1                | -0.953218               | -1.573941 | -2.708403 |
| 17               | 1                | -2.676972               | -1.288581 | -2.899980 |
| 18               | 1                | -1.601113               | 0.082288  | -2.709835 |
| 19               | 6                | 0.234992                | -2.056515 | -0.122012 |
| 20               | 1                | 0.033588                | -2.583608 | -1.059436 |
| 21               | 1                | 0.041939                | -2.770202 | 0.683192  |
| 22               | 6                | 1.653472                | -1.551350 | -0.129184 |
| 23               | 6                | 1.658426                | -0.183041 | -0.339368 |
| 24               | 6                | 2.872493                | -2.202250 | 0.070942  |
| 25               | 6                | 0.291291                | 0.361456  | -0.577924 |
| 26               | 6                | 2.830274                | 0.591028  | -0.256907 |
| 27               | 6                | 4.073810                | -1.460973 | 0.075635  |
| 28               | 1                | 2.907082                | -3.274278 | 0.244301  |
| 29               | 6                | 0.217173                | 1.827505  | -0.296021 |
| 30               | 6                | 2.652719                | 2.001187  | -0.217721 |

|    |   |           |           |           |
|----|---|-----------|-----------|-----------|
| 31 | 6 | 4.065252  | -0.079002 | -0.067310 |
| 32 | 1 | 5.015041  | -1.978458 | 0.229013  |
| 33 | 6 | 1.397336  | 2.596817  | -0.200425 |
| 34 | 1 | 3.527992  | 2.642595  | -0.140712 |
| 35 | 1 | 4.988657  | 0.488858  | -0.004266 |
| 36 | 1 | 1.332239  | 3.673144  | -0.104867 |
| 37 | 6 | 0.111763  | -0.482020 | 2.470076  |
| 38 | 1 | 0.623980  | -1.449411 | 2.513924  |
| 39 | 1 | 0.884532  | 0.265308  | 2.242498  |
| 40 | 1 | -0.264904 | -0.261562 | 3.471660  |
| 41 | 8 | -0.981180 | 2.348588  | -0.272703 |
| 42 | 6 | -1.197347 | 3.779706  | -0.146342 |
| 43 | 1 | -0.749016 | 4.300820  | -0.995180 |
| 44 | 1 | -2.278644 | 3.898428  | -0.157557 |
| 45 | 1 | -0.786910 | 4.136001  | 0.800674  |
| 46 | 1 | 0.135498  | 0.343493  | -1.674244 |
| 47 | 1 | -2.781790 | 1.006450  | -0.760997 |

-----  
mPW1PW91/6-31+G(d,p)//B3LYP/6-31+G(d,p):

HF = -890.1123831 hartrees (-558554.421519081 kcal/mol)

MPWB1K/6-31+G(d,p)//B3LYP/6-31+G(d,p):

HF = -889.8488094 hartrees (-558389.0264 kcal/mol)

M06-2X/6-31+G(d,p)//B3LYP/6-31+G(d,p):

HF = -889.9103544 hartrees (-558427.6465 kcal/mol)

**Table S4 (ii).** Coordinates and Energies. Path 2: **A2**→**D2**

The coordinates below are those for the enantiomer of the structure presented in Figure S10 (ii).

**A2**

B3LYP/6-31+G(d,p)//B3LYP/6-31+G(d,p):

HF = -890.2871372 hartrees (-558664.081464372 kcal/mol)

Imaginary Frequencies: none found

Zero-point correction = 0.403528 (Hartree/Particle)

Coordinates (from last standard orientation):

| -----  |        |                         |           |           |
|--------|--------|-------------------------|-----------|-----------|
| Center | Atomic | Coordinates (Angstroms) |           |           |
| Number | Number | X                       | Y         | Z         |
| -----  |        |                         |           |           |
| 1      | 6      | 3.750989                | -0.154015 | -0.870492 |
| 2      | 6      | 4.811611                | 0.322975  | -0.190169 |
| 3      | 6      | 1.235240                | -0.857099 | 0.806400  |
| 4      | 6      | 1.112592                | -1.941058 | -0.088365 |
| 5      | 6      | 2.173352                | -2.249565 | -0.926447 |
| 6      | 6      | 3.476619                | -1.587710 | -1.238425 |
| 7      | 1      | 3.054576                | 0.567742  | -1.297781 |
| 8      | 1      | 2.062153                | -3.191275 | -1.465535 |
| 9      | 1      | 4.252895                | -2.265803 | -0.850004 |
| 10     | 1      | 3.585274                | -1.699692 | -2.332048 |
| 11     | 6      | 5.892521                | -0.521407 | 0.437415  |
| 12     | 1      | 6.860101                | -0.306785 | -0.032813 |
| 13     | 1      | 6.003650                | -0.271491 | 1.499596  |
| 14     | 1      | 5.717790                | -1.596827 | 0.365154  |
| 15     | 6      | 5.006188                | 1.811308  | -0.025377 |
| 16     | 1      | 5.057776                | 2.087125  | 1.035524  |
| 17     | 1      | 5.957988                | 2.124462  | -0.471913 |
| 18     | 1      | 4.206699                | 2.387852  | -0.498684 |
| 19     | 6      | 0.264681                | -0.408757 | 1.831819  |
| 20     | 1      | 0.755944                | -0.036835 | 2.733642  |
| 21     | 1      | -0.477324               | -1.155323 | 2.105431  |
| 22     | 6      | -0.317281               | 0.739460  | 0.999225  |
| 23     | 6      | -1.633901               | 0.680795  | 0.407732  |
| 24     | 6      | 0.477785                | 1.874342  | 0.805743  |
| 25     | 6      | -2.546300               | -0.370866 | 0.619476  |
| 26     | 6      | -2.056863               | 1.801656  | -0.393722 |
| 27     | 6      | 0.042023                | 2.964380  | 0.037598  |
| 28     | 1      | 1.452829                | 1.924696  | 1.282846  |
| 29     | 6      | -3.819149               | -0.354622 | 0.051200  |
| 30     | 6      | -3.355702               | 1.782497  | -0.966334 |
| 31     | 6      | -1.200948               | 2.914858  | -0.568745 |
| 32     | 1      | 0.676591                | 3.836870  | -0.074130 |

|    |   |           |           |           |
|----|---|-----------|-----------|-----------|
| 33 | 6 | -4.225378 | 0.734376  | -0.761555 |
| 34 | 1 | -3.671036 | 2.630292  | -1.567686 |
| 35 | 1 | -1.544757 | 3.746716  | -1.177266 |
| 36 | 1 | -5.211586 | 0.756940  | -1.208032 |
| 37 | 6 | -0.098698 | -2.852004 | -0.068891 |
| 38 | 1 | -0.329902 | -3.197371 | 0.943647  |
| 39 | 1 | -0.982229 | -2.338211 | -0.456686 |
| 40 | 1 | 0.069220  | -3.735007 | -0.688920 |
| 41 | 8 | -4.598706 | -1.422078 | 0.331216  |
| 42 | 6 | -5.941449 | -1.474078 | -0.168838 |
| 43 | 1 | -5.953423 | -1.485493 | -1.263941 |
| 44 | 1 | -6.354360 | -2.408196 | 0.209749  |
| 45 | 1 | -6.532703 | -0.632840 | 0.207695  |
| 46 | 1 | -2.303002 | -1.222457 | 1.242007  |
| 47 | 1 | 2.148889  | -0.275277 | 0.734917  |

-----  
mPW1PW91/6-31+G(d,p)//B3LYP/6-31+G(d,p):  
HF = -890.0694221 hartrees (-558527.463061971 kcal/mol)

MPWB1K/6-31+G(d,p)//B3LYP/6-31+G(d,p):  
HF = -889.7933907 hartrees (-558354.2506 kcal/mol)

M06-2X/6-31+G(d,p)//B3LYP/6-31+G(d,p):  
HF = -889.8535017 hartrees (-558391.9709 kcal/mol)

**TS** <sub>A2-E2</sub>  
B3LYP/6-31+G(d,p)//B3LYP/6-31+G(d,p):  
HF = -890.2712711 hartrees (-558654.125327961 kcal/mol)  
Imaginary Frequencies: 1 (-136.8524 1/cm)  
Zero-point correction = 0.402166 (Hartree/Particle)

Coordinates (from last standard orientation):

-----  

| Center<br>Number | Atomic<br>Number | Coordinates (Angstroms) |           |           |
|------------------|------------------|-------------------------|-----------|-----------|
|                  |                  | X                       | Y         | Z         |
| 1                | 6                | 2.656113                | -0.270071 | -1.555783 |
| 2                | 6                | 3.219679                | 0.862908  | -1.019513 |
| 3                | 6                | 1.352346                | -0.784452 | 0.402873  |
| 4                | 6                | 2.242818                | -1.875616 | 0.749861  |
| 5                | 6                | 3.082450                | -2.356030 | -0.200303 |
| 6                | 6                | 3.297892                | -1.643868 | -1.509010 |
| 7                | 1                | 1.805858                | -0.139341 | -2.220039 |
| 8                | 1                | 3.687222                | -3.237548 | 0.000747  |
| 9                | 1                | 4.378182                | -1.582340 | -1.694431 |

S21

|    |   |           |           |           |
|----|---|-----------|-----------|-----------|
| 10 | 1 | 2.904208  | -2.268319 | -2.324499 |
| 11 | 6 | 4.487608  | 0.802804  | -0.219293 |
| 12 | 1 | 5.348681  | 0.742454  | -0.900926 |
| 13 | 1 | 4.624082  | 1.695782  | 0.395094  |
| 14 | 1 | 4.535246  | -0.084855 | 0.421036  |
| 15 | 6 | 2.645873  | 2.218328  | -1.294245 |
| 16 | 1 | 2.492531  | 2.784112  | -0.370023 |
| 17 | 1 | 3.371599  | 2.791992  | -1.887905 |
| 18 | 1 | 1.704068  | 2.177484  | -1.844370 |
| 19 | 6 | 0.808697  | 0.157638  | 1.425470  |
| 20 | 1 | 1.626442  | 0.660225  | 1.958025  |
| 21 | 1 | 0.375306  | -0.513443 | 2.194109  |
| 22 | 6 | -0.235196 | 1.147833  | 0.958654  |
| 23 | 6 | -1.489345 | 0.693406  | 0.424512  |
| 24 | 6 | 0.001348  | 2.502793  | 1.091362  |
| 25 | 6 | -1.851249 | -0.675016 | 0.339522  |
| 26 | 6 | -2.432970 | 1.680202  | -0.025411 |
| 27 | 6 | -0.941095 | 3.470116  | 0.667918  |
| 28 | 1 | 0.932488  | 2.840596  | 1.540076  |
| 29 | 6 | -3.073011 | -1.069105 | -0.189528 |
| 30 | 6 | -3.668983 | 1.241483  | -0.567279 |
| 31 | 6 | -2.128752 | 3.061554  | 0.105358  |
| 32 | 1 | -0.720985 | 4.525608  | 0.789704  |
| 33 | 6 | -3.991905 | -0.094857 | -0.659457 |
| 34 | 1 | -4.380701 | 1.987251  | -0.910169 |
| 35 | 1 | -2.858563 | 3.792299  | -0.231940 |
| 36 | 1 | -4.947425 | -0.389161 | -1.075561 |
| 37 | 6 | 2.245264  | -2.414055 | 2.169387  |
| 38 | 1 | 2.596169  | -1.657352 | 2.879486  |
| 39 | 1 | 1.244580  | -2.726718 | 2.485080  |
| 40 | 1 | 2.910522  | -3.276217 | 2.245379  |
| 41 | 8 | -3.308635 | -2.407023 | -0.214485 |
| 42 | 6 | -4.569705 | -2.889645 | -0.687989 |
| 43 | 1 | -4.723068 | -2.631438 | -1.741739 |
| 44 | 1 | -4.524208 | -3.973369 | -0.583811 |
| 45 | 1 | -5.394903 | -2.499477 | -0.082307 |
| 46 | 1 | -1.210567 | -1.463276 | 0.719464  |
| 47 | 1 | 0.745061  | -0.896863 | -0.487223 |

-----  
mpW1PW91/6-31+G(d,p)//B3LYP/6-31+G(d,p):  
HF = -890.0562 hartrees (-558519.1661 kcal/mol)

MPWB1K/6-31+G(d,p)//B3LYP/6-31+G(d,p):  
HF = -889.7824301 hartrees (-558347.3727 kcal/mol)

M06-2X/6-31+G(d,p)//B3LYP/6-31+G(d,p):  
HF = -889.8451418 hartrees (-558386.7249 kcal/mol)

## E2

B3LYP/6-31+G(d,p)//B3LYP/6-31+G(d,p):  
HF = -890.2980938 hartrees (-558670.956840438 kcal/mol)  
Imaginary Frequencies: none found  
Zero-point correction = 0.406030 (Hartree/Particle)

Coordinates (from last standard orientation):

| -----  |        |                         |           |           |
|--------|--------|-------------------------|-----------|-----------|
| Center | Atomic | Coordinates (Angstroms) |           |           |
| Number | Number | X                       | Y         | Z         |
| -----  |        |                         |           |           |
| 1      | 6      | -1.524532               | -0.553907 | 1.031399  |
| 2      | 6      | -1.554008               | 0.934281  | 1.124889  |
| 3      | 6      | -1.702271               | -1.145628 | -0.407411 |
| 4      | 6      | -3.171181               | -1.546021 | -0.480251 |
| 5      | 6      | -3.727309               | -1.532011 | 0.739094  |
| 6      | 6      | -2.757904               | -1.148180 | 1.827762  |
| 7      | 1      | -0.587888               | -0.900356 | 1.470557  |
| 8      | 1      | -4.747254               | -1.833254 | 0.958975  |
| 9      | 1      | -3.171421               | -0.462436 | 2.575751  |
| 10     | 1      | -2.406900               | -2.027024 | 2.384535  |
| 11     | 6      | -2.771104               | 1.700782  | 0.715892  |
| 12     | 1      | -3.517798               | 1.553367  | 1.512476  |
| 13     | 1      | -2.578763               | 2.773006  | 0.655796  |
| 14     | 1      | -3.231853               | 1.337478  | -0.201162 |
| 15     | 6      | -0.637177               | 1.616856  | 2.070887  |
| 16     | 1      | -0.237427               | 2.541542  | 1.631605  |
| 17     | 1      | -1.220144               | 1.943115  | 2.946696  |
| 18     | 1      | 0.184683                | 0.984601  | 2.406761  |
| 19     | 6      | -1.183313               | -0.189145 | -1.526013 |
| 20     | 1      | -2.028351               | 0.331691  | -1.985316 |
| 21     | 1      | -0.730916               | -0.786162 | -2.326533 |
| 22     | 6      | -0.195760               | 0.852036  | -1.044772 |
| 23     | 6      | 1.131634                | 0.490056  | -0.581404 |
| 24     | 6      | -0.476298               | 2.211975  | -1.249317 |
| 25     | 6      | 1.572140                | -0.841733 | -0.492049 |
| 26     | 6      | 2.049271                | 1.540882  | -0.228495 |
| 27     | 6      | 0.426124                | 3.230765  | -0.908162 |
| 28     | 1      | -1.433111               | 2.484070  | -1.684770 |
| 29     | 6      | 2.860397                | -1.152423 | -0.050710 |
| 30     | 6      | 3.346765                | 1.194847  | 0.230597  |
| 31     | 6      | 1.665818                | 2.894998  | -0.386670 |
| 32     | 1      | 0.158086                | 4.269974  | -1.067079 |

|    |   |           |           |           |
|----|---|-----------|-----------|-----------|
| 33 | 6 | 3.755233  | -0.117863 | 0.325421  |
| 34 | 1 | 4.035310  | 1.990629  | 0.500278  |
| 35 | 1 | 2.375291  | 3.674387  | -0.121180 |
| 36 | 1 | 4.755694  | -0.347021 | 0.670673  |
| 37 | 6 | -3.805166 | -2.000932 | -1.760342 |
| 38 | 1 | -3.779673 | -1.222617 | -2.532531 |
| 39 | 1 | -3.273492 | -2.869025 | -2.171215 |
| 40 | 1 | -4.848266 | -2.286809 | -1.605625 |
| 41 | 8 | 3.167255  | -2.465041 | -0.017121 |
| 42 | 6 | 4.482891  | -2.882627 | 0.374478  |
| 43 | 1 | 4.695283  | -2.591949 | 1.408650  |
| 44 | 1 | 4.475608  | -3.968786 | 0.295082  |
| 45 | 1 | 5.240760  | -2.470294 | -0.299509 |
| 46 | 1 | 0.940364  | -1.668811 | -0.789849 |
| 47 | 1 | -1.111363 | -2.071017 | -0.445039 |

-----  
mPW1PW91/6-31+G(d,p)//B3LYP/6-31+G(d,p):  
HF = -890.0930611 hartrees (-558542.2968 kcal/mol)

MPWB1K/6-31+G(d,p)//B3LYP/6-31+G(d,p):  
HF = -889.8265938 hartrees (-558375.0859 kcal/mol)

M06-2X/6-31+G(d,p)//B3LYP/6-31+G(d,p):  
HF = -889.8867459 hartrees (-558412.8319 kcal/mol)

**TS<sub>E2-C2</sub>**

B3LYP/6-31+G(d,p)//B3LYP/6-31+G(d,p):  
HF = -890.2603764 hartrees (-558647.288794764 kcal/mol)

Imaginary Frequencies: 1 (-234.9068 1/cm)

Zero-point correction = 0.403764 (Hartree/Particle)

Coordinates (from last standard orientation):

-----  

| Center<br>Number | Atomic<br>Number | Coordinates (Angstroms) |           |           |
|------------------|------------------|-------------------------|-----------|-----------|
|                  |                  | X                       | Y         | Z         |
| 1                | 6                | 1.911813                | -0.295190 | -1.488132 |
| 2                | 6                | 2.850757                | 0.514550  | -0.680562 |
| 3                | 6                | 1.788247                | -0.107733 | 0.331086  |
| 4                | 6                | 2.161487                | -1.528649 | 0.760196  |
| 5                | 6                | 2.310026                | -2.368151 | -0.272400 |
| 6                | 6                | 2.094864                | -1.784885 | -1.654342 |
| 7                | 1                | 1.187988                | 0.238648  | -2.104441 |
| 8                | 1                | 2.584271                | -3.411962 | -0.163736 |
| 9                | 1                | 2.977200                | -1.948332 | -2.290892 |

S24



|    |   |           |           |           |
|----|---|-----------|-----------|-----------|
| 10 | 1 | 1.240633  | -2.237683 | -2.170169 |
| 11 | 6 | 4.309493  | 0.085156  | -0.530621 |
| 12 | 1 | 4.856907  | 0.365495  | -1.435457 |
| 13 | 1 | 4.764044  | 0.624962  | 0.305160  |
| 14 | 1 | 4.447957  | -0.981324 | -0.362615 |
| 15 | 6 | 2.745902  | 2.022060  | -0.912088 |
| 16 | 1 | 3.165375  | 2.572907  | -0.065492 |
| 17 | 1 | 3.334079  | 2.286977  | -1.795952 |
| 18 | 1 | 1.720784  | 2.361331  | -1.067902 |
| 19 | 6 | 1.052908  | 0.864433  | 1.315110  |
| 20 | 1 | 1.780975  | 1.593086  | 1.677922  |
| 21 | 1 | 0.773463  | 0.238585  | 2.168491  |
| 22 | 6 | -0.174410 | 1.579462  | 0.787252  |
| 23 | 6 | -1.328728 | 0.836623  | 0.361795  |
| 24 | 6 | -0.199859 | 2.962122  | 0.740480  |
| 25 | 6 | -1.420685 | -0.576873 | 0.451073  |
| 26 | 6 | -2.448751 | 1.562595  | -0.171993 |
| 27 | 6 | -1.318744 | 3.673050  | 0.246453  |
| 28 | 1 | 0.663547  | 3.523144  | 1.088808  |
| 29 | 6 | -2.549594 | -1.258041 | 0.009722  |
| 30 | 6 | -3.582171 | 0.833489  | -0.616959 |
| 31 | 6 | -2.414698 | 2.981637  | -0.217811 |
| 32 | 1 | -1.300975 | 4.757700  | 0.229487  |
| 33 | 6 | -3.642498 | -0.541305 | -0.542867 |
| 34 | 1 | -4.428065 | 1.383064  | -1.020360 |
| 35 | 1 | -3.274535 | 3.513738  | -0.615032 |
| 36 | 1 | -4.527966 | -1.059657 | -0.889356 |
| 37 | 6 | 2.339981  | -1.875211 | 2.210380  |
| 38 | 1 | 3.055082  | -1.202477 | 2.698153  |
| 39 | 1 | 1.399275  | -1.808108 | 2.768591  |
| 40 | 1 | 2.710103  | -2.897706 | 2.310522  |
| 41 | 8 | -2.525176 | -2.608045 | 0.153773  |
| 42 | 6 | -3.690788 | -3.371918 | -0.175956 |
| 43 | 1 | -3.925786 | -3.296469 | -1.243382 |
| 44 | 1 | -3.440505 | -4.403953 | 0.067930  |
| 45 | 1 | -4.551916 | -3.054046 | 0.421446  |
| 46 | 1 | 0.876124  | -0.363817 | -0.375293 |
| 47 | 1 | -0.653946 | -1.173066 | 0.934494  |

-----  
mpW1PW91/6-31+G(d,p)//B3LYP/6-31+G(d,p):  
HF = -890.0601792 hartrees (-558521.663 kcal/mol)

MPWB1K/6-31+G(d,p)//B3LYP/6-31+G(d,p):  
HF = -889.794978 hartrees (-558355.2466 kcal/mol)

M06-2X/6-31+G(d,p)//B3LYP/6-31+G(d,p):  
HF = -889.8559053 hartrees (-558393.4791 kcal/mol)

## C2

B3LYP/6-31+G(d,p)//B3LYP/6-31+G(d,p):  
HF = -890.3093959 hartrees (-558678.049021209 kcal/mol)  
Imaginary Frequencies: none found  
Zero-point correction = 0.406539 (Hartree/Particle)

Coordinates (from last standard orientation):

| -----  |        |                         |           |           |
|--------|--------|-------------------------|-----------|-----------|
| Center | Atomic | Coordinates (Angstroms) |           |           |
| Number | Number | X                       | Y         | Z         |
| -----  |        |                         |           |           |
| 1      | 6      | -2.631001               | 0.612667  | -1.735391 |
| 2      | 6      | -2.350731               | -0.641080 | -0.874125 |
| 3      | 6      | -1.796624               | -0.235049 | 0.479459  |
| 4      | 6      | -2.256092               | 0.965842  | 1.111586  |
| 5      | 6      | -3.073675               | 1.822245  | 0.402757  |
| 6      | 6      | -3.464142               | 1.666889  | -1.011988 |
| 7      | 1      | -3.128738               | 0.300399  | -2.658090 |
| 8      | 1      | -3.477934               | 2.684927  | 0.931468  |
| 9      | 1      | -4.541908               | 1.422647  | -1.017617 |
| 10     | 1      | -3.413607               | 2.645261  | -1.508175 |
| 11     | 6      | -3.690277               | -1.398019 | -0.552174 |
| 12     | 1      | -4.140559               | -1.697540 | -1.503291 |
| 13     | 1      | -3.503693               | -2.305702 | 0.027215  |
| 14     | 1      | -4.409100               | -0.783614 | -0.004681 |
| 15     | 6      | -1.460661               | -1.595986 | -1.694480 |
| 16     | 1      | -1.315327               | -2.560023 | -1.206690 |
| 17     | 1      | -1.955293               | -1.781139 | -2.652778 |
| 18     | 1      | -0.478724               | -1.162855 | -1.896809 |
| 19     | 6      | -0.941004               | -1.178498 | 1.273079  |
| 20     | 1      | -1.551408               | -2.087853 | 1.388053  |
| 21     | 1      | -0.790810               | -0.782868 | 2.278405  |
| 22     | 6      | 0.413660                | -1.637735 | 0.713738  |
| 23     | 6      | 1.415753                | -0.694650 | 0.312199  |
| 24     | 6      | 0.694762                | -2.990585 | 0.695052  |
| 25     | 6      | 1.224801                | 0.707799  | 0.331265  |
| 26     | 6      | 2.685916                | -1.203856 | -0.132669 |
| 27     | 6      | 1.950098                | -3.483468 | 0.268070  |
| 28     | 1      | -0.061838               | -3.702201 | 1.016604  |
| 29     | 6      | 2.217094                | 1.585333  | -0.080651 |
| 30     | 6      | 3.679110                | -0.278938 | -0.547816 |
| 31     | 6      | 2.923418                | -2.603486 | -0.145913 |
| 32     | 1      | 2.133943                | -4.552717 | 0.269230  |

|    |   |           |           |           |
|----|---|-----------|-----------|-----------|
| 33 | 6 | 3.465372  | 1.082073  | -0.530075 |
| 34 | 1 | 4.636134  | -0.663825 | -0.888638 |
| 35 | 1 | 3.889386  | -2.967969 | -0.483717 |
| 36 | 1 | 4.251612  | 1.753297  | -0.852520 |
| 37 | 6 | -1.911965 | 1.310403  | 2.549680  |
| 38 | 1 | -2.272476 | 0.550310  | 3.249784  |
| 39 | 1 | -0.833367 | 1.417861  | 2.699772  |
| 40 | 1 | -2.374679 | 2.259151  | 2.828772  |
| 41 | 8 | 1.909659  | 2.909393  | -0.016862 |
| 42 | 6 | 2.906325  | 3.875733  | -0.365803 |
| 43 | 1 | 3.202071  | 3.778758  | -1.416276 |
| 44 | 1 | 2.438235  | 4.847335  | -0.209564 |
| 45 | 1 | 3.785949  | 3.787063  | 0.280945  |
| 46 | 1 | -1.670608 | 1.053919  | -2.028038 |
| 47 | 1 | 0.304649  | 1.146440  | 0.696720  |

-----  
mPW1PW91/6-31+G(d,p)//B3LYP/6-31+G(d,p):

HF = -890.101875 hartrees (-558547.8276 kcal/mol)

MPWB1K/6-31+G(d,p)//B3LYP/6-31+G(d,p):

HF = -889.8333013 hartrees (-558379.2949 kcal/mol)

M06-2X/6-31+G(d,p)//B3LYP/6-31+G(d,p):

HF = -889.89553 hartrees (-558418.344 kcal/mol)

**TS** c2-D2

B3LYP/6-31+G(d,p)//B3LYP/6-31+G(d,p):

HF = -890.2956123 hartrees (-558669.399674373 kcal/mol)

Imaginary Frequencies: 1 (-234.6031 1/cm)

Zero-point correction = 0.407172 (Hartree/Particle)

Coordinates (from last standard orientation):

-----  

| Center<br>Number | Atomic<br>Number | Coordinates (Angstroms) |           |           |
|------------------|------------------|-------------------------|-----------|-----------|
|                  |                  | X                       | Y         | Z         |
| 1                | 6                | -2.120263               | -0.073149 | -1.684817 |
| 2                | 6                | -1.155948               | -1.161317 | -1.161325 |
| 3                | 6                | -0.934980               | -0.973181 | 0.357532  |
| 4                | 6                | -2.134781               | -0.631837 | 1.144914  |
| 5                | 6                | -3.275013               | -0.223333 | 0.527110  |
| 6                | 6                | -3.455007               | -0.049298 | -0.941549 |
| 7                | 1                | -2.283868               | -0.232464 | -2.755538 |
| 8                | 1                | -4.147644               | -0.033420 | 1.149831  |
| 9                | 1                | -4.129658               | -0.842084 | -1.301130 |

S27

|    |   |           |           |           |
|----|---|-----------|-----------|-----------|
| 10 | 1 | -3.996583 | 0.885445  | -1.134100 |
| 11 | 6 | -1.803913 | -2.572301 | -1.351453 |
| 12 | 1 | -2.110447 | -2.675071 | -2.396921 |
| 13 | 1 | -1.089564 | -3.373063 | -1.143852 |
| 14 | 1 | -2.682270 | -2.726135 | -0.720498 |
| 15 | 6 | 0.114349  | -1.126804 | -2.031212 |
| 16 | 1 | 0.852613  | -1.876288 | -1.739678 |
| 17 | 1 | -0.170301 | -1.334041 | -3.067361 |
| 18 | 1 | 0.592037  | -0.144106 | -2.012547 |
| 19 | 6 | 0.112247  | -1.883873 | 1.039924  |
| 20 | 1 | -0.033219 | -2.911844 | 0.690479  |
| 21 | 1 | -0.062740 | -1.901383 | 2.118531  |
| 22 | 6 | 1.521299  | -1.409625 | 0.749834  |
| 23 | 6 | 1.587010  | -0.029311 | 0.508768  |
| 24 | 6 | 2.662260  | -2.180697 | 0.595487  |
| 25 | 6 | 0.375046  | 0.726085  | 0.724463  |
| 26 | 6 | 2.740507  | 0.553743  | -0.068521 |
| 27 | 6 | 3.862726  | -1.586318 | 0.136980  |
| 28 | 1 | 2.635230  | -3.251266 | 0.779767  |
| 29 | 6 | 0.309094  | 2.045543  | 0.187724  |
| 30 | 6 | 2.615372  | 1.885290  | -0.558905 |
| 31 | 6 | 3.899319  | -0.250959 | -0.224862 |
| 32 | 1 | 4.747107  | -2.203340 | 0.016713  |
| 33 | 6 | 1.428260  | 2.595047  | -0.487775 |
| 34 | 1 | 3.472683  | 2.348933  | -1.040503 |
| 35 | 1 | 4.798824  | 0.179285  | -0.655131 |
| 36 | 1 | 1.385434  | 3.596930  | -0.896312 |
| 37 | 6 | -2.126572 | -0.747532 | 2.656374  |
| 38 | 1 | -2.042908 | -1.786988 | 2.992240  |
| 39 | 1 | -1.299696 | -0.195167 | 3.120647  |
| 40 | 1 | -3.052330 | -0.343338 | 3.070813  |
| 41 | 8 | -0.807514 | 2.726252  | 0.456635  |
| 42 | 6 | -0.929329 | 4.112429  | 0.076704  |
| 43 | 1 | -0.886429 | 4.220094  | -1.010863 |
| 44 | 1 | -1.907248 | 4.422249  | 0.440996  |
| 45 | 1 | -0.147530 | 4.709864  | 0.553967  |
| 46 | 1 | -1.633128 | 0.902797  | -1.582467 |
| 47 | 1 | -0.098357 | 0.642779  | 1.697459  |

-----  
mpW1PW91/6-31+G(d,p)//B3LYP/6-31+G(d,p):  
HF = -890.0923695 hartrees (-558541.8628 kcal/mol)

MPWB1K/6-31+G(d,p)//B3LYP/6-31+G(d,p):  
HF = -889.8244236 hartrees (-558373.7241 kcal/mol)

M06-2X/6-31+G(d,p)//B3LYP/6-31+G(d,p):  
HF = -889.8873451 hartrees (-558413.2079 kcal/mol)

**D2**

B3LYP/6-31+G(d,p)//B3LYP/6-31+G(d,p):  
HF = -890.3073515 hartrees (-558676.766139765 kcal/mol)  
Imaginary Frequencies: none found  
Zero-point correction = 0.408858 (Hartree/Particle)

Coordinates (from last standard orientation):

```
-----
```

| Center<br>Number | Atomic<br>Number | Coordinates (Angstroms) |           |           |
|------------------|------------------|-------------------------|-----------|-----------|
|                  |                  | X                       | Y         | Z         |
| 1                | 6                | -2.227726               | -0.113935 | -1.581804 |
| 2                | 6                | -1.052350               | -1.045067 | -1.194449 |
| 3                | 6                | -0.687428               | -0.839116 | 0.340128  |
| 4                | 6                | -1.947787               | -0.791940 | 1.213854  |
| 5                | 6                | -3.169596               | -0.573758 | 0.697691  |
| 6                | 6                | -3.486631               | -0.365543 | -0.751392 |
| 7                | 1                | -2.444605               | -0.257404 | -2.646250 |
| 8                | 1                | -4.016960               | -0.562912 | 1.381642  |
| 9                | 1                | -4.031914               | -1.243506 | -1.127331 |
| 10               | 1                | -4.188729               | 0.471161  | -0.858225 |
| 11               | 6                | -1.499775               | -2.510972 | -1.442473 |
| 12               | 1                | -1.998758               | -2.574701 | -2.414683 |
| 13               | 1                | -0.652156               | -3.200406 | -1.481633 |
| 14               | 1                | -2.198675               | -2.873112 | -0.684013 |
| 15               | 6                | 0.111729                | -0.750898 | -2.161989 |
| 16               | 1                | 0.973023                | -1.404772 | -2.005638 |
| 17               | 1                | -0.231919               | -0.911982 | -3.189120 |
| 18               | 1                | 0.452971                | 0.289321  | -2.104862 |
| 19               | 6                | 0.348517                | -1.935398 | 0.839260  |
| 20               | 1                | 0.180699                | -2.903446 | 0.367466  |
| 21               | 1                | 0.239471                | -2.095613 | 1.916130  |
| 22               | 6                | 1.719722                | -1.367107 | 0.558100  |
| 23               | 6                | 1.616250                | 0.006458  | 0.400396  |
| 24               | 6                | 2.971580                | -1.959953 | 0.401619  |
| 25               | 6                | 0.230600                | 0.482167  | 0.635798  |
| 26               | 6                | 2.690443                | 0.814221  | -0.006811 |
| 27               | 6                | 4.087850                | -1.163024 | 0.055950  |
| 28               | 1                | 3.099844                | -3.032202 | 0.521165  |
| 29               | 6                | -0.000456               | 1.877834  | 0.174434  |
| 30               | 6                | 2.371552                | 2.159518  | -0.341110 |
| 31               | 6                | 3.961075                | 0.201864  | -0.165482 |
| 32               | 1                | 5.056094                | -1.637103 | -0.066870 |

|    |   |           |           |           |
|----|---|-----------|-----------|-----------|
| 33 | 6 | 1.077661  | 2.666986  | -0.282102 |
| 34 | 1 | 3.164850  | 2.819163  | -0.686367 |
| 35 | 1 | 4.816488  | 0.792483  | -0.479274 |
| 36 | 1 | 0.908612  | 3.697403  | -0.568224 |
| 37 | 6 | -1.806188 | -0.983233 | 2.710671  |
| 38 | 1 | -1.580523 | -2.021758 | 2.980327  |
| 39 | 1 | -1.009668 | -0.367964 | 3.152577  |
| 40 | 1 | -2.735257 | -0.711927 | 3.216843  |
| 41 | 8 | -1.209905 | 2.344525  | 0.369632  |
| 42 | 6 | -1.541532 | 3.735654  | 0.123280  |
| 43 | 1 | -1.407575 | 3.972828  | -0.934744 |
| 44 | 1 | -2.590050 | 3.823785  | 0.399357  |
| 45 | 1 | -0.927125 | 4.382779  | 0.753526  |
| 46 | 1 | -1.924364 | 0.931474  | -1.472391 |
| 47 | 1 | 0.120402  | 0.593683  | 1.732131  |

-----  
mPW1PW91/6-31+G(d,p)//B3LYP/6-31+G(d,p):  
HF = -890.1092393 hartrees (-558552.4488 kcal/mol)

MPWB1K/6-31+G(d,p)//B3LYP/6-31+G(d,p):  
HF = -889.8462327 hartrees (-558387.4095 kcal/mol)

M06-2X/6-31+G(d,p)//B3LYP/6-31+G(d,p):  
HF = -889.9074548 hartrees (-558425.827 kcal/mol)

**Table S4 (iii).** Coordinates and Energies. **E2**→**F1** conversion

*The coordinates below are those for the enantiomer of the structure presented in Figure S10 (iii).*

**TS**<sub>E2-F1</sub>

B3LYP/6-31+G(d,p)//B3LYP/6-31+G(d,p):

HF = -890.2975642 hartrees (-558670.624511142 kcal/mol)

Imaginary Frequencies: 1 (-143.9420 1/cm)

Zero-point correction = 0.406847 (Hartree/Particle)

Coordinates (from last standard orientation):

| -----  |        |                         |           |           |
|--------|--------|-------------------------|-----------|-----------|
| Center | Atomic | Coordinates (Angstroms) |           |           |
| Number | Number | X                       | Y         | Z         |
| -----  |        |                         |           |           |
| 1      | 6      | -1.494244               | -0.637317 | 0.985720  |
| 2      | 6      | -1.371575               | 0.870992  | 1.047236  |
| 3      | 6      | -1.754618               | -1.151516 | -0.461865 |
| 4      | 6      | -3.247324               | -1.457471 | -0.495807 |
| 5      | 6      | -3.759062               | -1.447468 | 0.743177  |
| 6      | 6      | -2.729063               | -1.155602 | 1.806113  |
| 7      | 1      | -0.570109               | -1.059347 | 1.385453  |
| 8      | 1      | -4.789648               | -1.687924 | 0.987690  |
| 9      | 1      | -3.071147               | -0.457619 | 2.578303  |
| 10     | 1      | -2.438065               | -2.071796 | 2.337241  |
| 11     | 6      | -2.605932               | 1.707100  | 0.804066  |
| 12     | 1      | -3.285347               | 1.533821  | 1.649740  |
| 13     | 1      | -2.377505               | 2.773982  | 0.792143  |
| 14     | 1      | -3.158362               | 1.430577  | -0.093227 |
| 15     | 6      | -0.445732               | 1.435128  | 2.079942  |
| 16     | 1      | -0.132862               | 2.456449  | 1.839932  |
| 17     | 1      | -1.006258               | 1.501061  | 3.025076  |
| 18     | 1      | 0.430468                | 0.809056  | 2.251832  |
| 19     | 6      | -1.224987               | -0.118177 | -1.500167 |
| 20     | 1      | -2.063303               | 0.427867  | -1.942267 |
| 21     | 1      | -0.725371               | -0.626656 | -2.332040 |
| 22     | 6      | -0.271930               | 0.894460  | -0.878424 |
| 23     | 6      | 1.091650                | 0.497944  | -0.512353 |
| 24     | 6      | -0.491928               | 2.275731  | -1.131664 |
| 25     | 6      | 1.507733                | -0.835728 | -0.449971 |
| 26     | 6      | 2.056673                | 1.527201  | -0.221395 |
| 27     | 6      | 0.450558                | 3.260435  | -0.851112 |
| 28     | 1      | -1.455371               | 2.572808  | -1.533990 |
| 29     | 6      | 2.816854                | -1.174286 | -0.081294 |
| 30     | 6      | 3.372828                | 1.156921  | 0.165671  |
| 31     | 6      | 1.706953                | 2.883810  | -0.381447 |
| 32     | 1      | 0.216140                | 4.306354  | -1.017015 |

|    |   |           |           |           |
|----|---|-----------|-----------|-----------|
| 33 | 6 | 3.757305  | -0.162254 | 0.243533  |
| 34 | 1 | 4.090129  | 1.940208  | 0.393371  |
| 35 | 1 | 2.452647  | 3.644394  | -0.163770 |
| 36 | 1 | 4.768875  | -0.415235 | 0.535041  |
| 37 | 6 | -3.952558 | -1.822691 | -1.767547 |
| 38 | 1 | -3.898010 | -1.021320 | -2.514824 |
| 39 | 1 | -3.497183 | -2.710661 | -2.225300 |
| 40 | 1 | -5.008041 | -2.040609 | -1.587264 |
| 41 | 8 | 3.092316  | -2.488625 | -0.065440 |
| 42 | 6 | 4.414264  | -2.946268 | 0.263920  |
| 43 | 1 | 4.681317  | -2.662332 | 1.286785  |
| 44 | 1 | 4.369386  | -4.031297 | 0.184962  |
| 45 | 1 | 5.149343  | -2.554985 | -0.446228 |
| 46 | 1 | 0.844252  | -1.651904 | -0.704952 |
| 47 | 1 | -1.219686 | -2.101550 | -0.601156 |

-----  
mPW1PW91/6-31+G(d,p)//B3LYP/6-31+G(d,p):

HF = -890.094627 hartrees (-558543.2794 kcal/mol)

MPWB1K/6-31+G(d,p)//B3LYP/6-31+G(d,p):

HF = -889.8287797 hartrees (-558376.4575 kcal/mol)

M06-2X/6-31+G(d,p)//B3LYP/6-31+G(d,p):

HF = -889.8894347 hartrees (-558414.5192 kcal/mol)

### F1

B3LYP/6-31+G(d,p)//B3LYP/6-31+G(d,p):

HF = -890.3029815 hartrees (-558674.023921065 kcal/mol)

Imaginary Frequencies: none found

Zero-point correction = 0.408866 (Hartree/Particle)

Coordinates (from last standard orientation):

-----

| Center<br>Number | Atomic<br>Number | Coordinates (Angstroms) |           |           |
|------------------|------------------|-------------------------|-----------|-----------|
|                  |                  | X                       | Y         | Z         |
| 1                | 6                | -1.527546               | -0.731729 | 0.940715  |
| 2                | 6                | -1.218574               | 0.799064  | 0.952882  |
| 3                | 6                | -1.788829               | -1.132613 | -0.538013 |
| 4                | 6                | -3.291625               | -1.371780 | -0.603750 |
| 5                | 6                | -3.820828               | -1.389944 | 0.628499  |
| 6                | 6                | -2.794668               | -1.187857 | 1.716745  |
| 7                | 1                | -0.647906               | -1.242113 | 1.341886  |
| 8                | 1                | -4.867954               | -1.583638 | 0.843976  |
| 9                | 1                | -3.115465               | -0.490212 | 2.498196  |

S32



|    |   |           |           |           |
|----|---|-----------|-----------|-----------|
| 10 | 1 | -2.591157 | -2.135659 | 2.234054  |
| 11 | 6 | -2.488245 | 1.676660  | 0.920504  |
| 12 | 1 | -3.106509 | 1.445744  | 1.790399  |
| 13 | 1 | -2.238678 | 2.739011  | 0.989422  |
| 14 | 1 | -3.108613 | 1.512218  | 0.037477  |
| 15 | 6 | -0.373662 | 1.208838  | 2.163155  |
| 16 | 1 | -0.063153 | 2.257773  | 2.109671  |
| 17 | 1 | -0.975725 | 1.100059  | 3.071780  |
| 18 | 1 | 0.516114  | 0.585034  | 2.281192  |
| 19 | 6 | -1.224950 | 0.013111  | -1.425513 |
| 20 | 1 | -2.044504 | 0.590576  | -1.862749 |
| 21 | 1 | -0.618098 | -0.347971 | -2.260252 |
| 22 | 6 | -0.380932 | 0.956753  | -0.506177 |
| 23 | 6 | 1.059918  | 0.516284  | -0.338957 |
| 24 | 6 | -0.496601 | 2.372954  | -0.915133 |
| 25 | 6 | 1.443468  | -0.811375 | -0.288655 |
| 26 | 6 | 2.097805  | 1.514346  | -0.219015 |
| 27 | 6 | 0.518342  | 3.287463  | -0.850990 |
| 28 | 1 | -1.477730 | 2.707635  | -1.235139 |
| 29 | 6 | 2.789696  | -1.186625 | -0.069805 |
| 30 | 6 | 3.444176  | 1.117304  | 0.031233  |
| 31 | 6 | 1.803560  | 2.859862  | -0.452061 |
| 32 | 1 | 0.349083  | 4.326989  | -1.110094 |
| 33 | 6 | 3.799023  | -0.207067 | 0.114090  |
| 34 | 1 | 4.202773  | 1.887366  | 0.137928  |
| 35 | 1 | 2.605106  | 3.590744  | -0.371207 |
| 36 | 1 | 4.828141  | -0.489004 | 0.295849  |
| 37 | 6 | -3.994914 | -1.636429 | -1.901747 |
| 38 | 1 | -3.879055 | -0.806487 | -2.610498 |
| 39 | 1 | -3.585101 | -2.528438 | -2.393795 |
| 40 | 1 | -5.065067 | -1.797823 | -1.749213 |
| 41 | 8 | 3.011107  | -2.499366 | -0.053248 |
| 42 | 6 | 4.340998  | -3.020968 | 0.146742  |
| 43 | 1 | 4.725606  | -2.723997 | 1.126499  |
| 44 | 1 | 4.229762  | -4.102800 | 0.104905  |
| 45 | 1 | 5.008532  | -2.683994 | -0.651297 |
| 46 | 1 | 0.738100  | -1.619612 | -0.425556 |
| 47 | 1 | -1.281033 | -2.073973 | -0.795938 |

-----  
mpW1PW91/6-31+G(d,p)//B3LYP/6-31+G(d,p):  
HF = -890.1035357 hartrees (-558548.8697 kcal/mol)

MPWB1K/6-31+G(d,p)//B3LYP/6-31+G(d,p):  
HF = -889.839551 hartrees (-558383.2166 kcal/mol)

M06-2X/6-31+G(d,p)//B3LYP/6-31+G(d,p):  
HF = -889.8985877 hartrees (-558420.2628 kcal/mol)

**Table S4 (iv).** Coordinates and Energies. Path 3: **E3**→**D3**

*The coordinates below are those for the enantiomer of the structure presented in Figure S10 (iv).*

**E3**

B3LYP/6-31+G(d,p)//B3LYP/6-31+G(d,p):

HF = -890.2981525 hartrees (-558670.993675275 kcal/mol)

Imaginary Frequencies: none found

Zero-point correction = 0.405366 (Hartree/Particle)

Coordinates (from last standard orientation):

| -----  |        |                         |           |           |
|--------|--------|-------------------------|-----------|-----------|
| Center | Atomic | Coordinates (Angstroms) |           |           |
| Number | Number | X                       | Y         | Z         |
| -----  |        |                         |           |           |
| 1      | 6      | 2.680727                | 0.616974  | 0.605092  |
| 2      | 6      | 2.576471                | -0.110064 | -0.800338 |
| 3      | 6      | 3.454418                | -1.343827 | -0.663738 |
| 4      | 6      | 4.086609                | -1.373171 | 0.516467  |
| 5      | 6      | 3.811780                | -0.176333 | 1.383947  |
| 6      | 1      | 2.990973                | 1.652694  | 0.456147  |
| 7      | 1      | 4.778614                | -2.150968 | 0.826130  |
| 8      | 1      | 4.687972                | 0.477060  | 1.478783  |
| 9      | 1      | 3.525845                | -0.446678 | 2.408502  |
| 10     | 6      | 1.126775                | -0.415912 | -1.249772 |
| 11     | 1      | 1.137565                | -0.624839 | -2.327657 |
| 12     | 1      | 0.800479                | -1.342801 | -0.774548 |
| 13     | 6      | 0.140401                | 0.697663  | -0.959975 |
| 14     | 6      | -1.229857               | 0.423206  | -0.589235 |
| 15     | 6      | 0.503953                | 2.027316  | -1.209976 |
| 16     | 6      | -1.730397               | -0.880947 | -0.390234 |
| 17     | 6      | -2.128925               | 1.532183  | -0.397558 |
| 18     | 6      | -0.384356               | 3.100474  | -1.043189 |
| 19     | 1      | 1.511163                | 2.243607  | -1.553539 |
| 20     | 6      | -3.056363               | -1.102535 | -0.008155 |
| 21     | 6      | -3.469472               | 1.272728  | -0.003873 |
| 22     | 6      | -1.682442               | 2.854177  | -0.628017 |
| 23     | 1      | -0.054688               | 4.113688  | -1.248403 |
| 24     | 6      | -3.936079               | -0.007634 | 0.193858  |
| 25     | 1      | -4.141532               | 2.114422  | 0.138033  |
| 26     | 1      | -2.380183               | 3.675978  | -0.491639 |
| 27     | 1      | -4.965558               | -0.168004 | 0.488607  |
| 28     | 6      | 3.594601                | -2.326782 | -1.787709 |
| 29     | 1      | 3.974228                | -1.833419 | -2.691734 |
| 30     | 1      | 2.632699                | -2.780254 | -2.055197 |
| 31     | 1      | 4.286108                | -3.131223 | -1.526430 |
| 32     | 8      | -3.414420               | -2.394084 | 0.138058  |

|    |   |           |           |           |
|----|---|-----------|-----------|-----------|
| 33 | 6 | -4.765970 | -2.727795 | 0.485439  |
| 34 | 1 | -5.031089 | -2.319244 | 1.466166  |
| 35 | 1 | -4.792861 | -3.815873 | 0.523818  |
| 36 | 1 | -5.465366 | -2.369787 | -0.276931 |
| 37 | 1 | -1.126758 | -1.760170 | -0.577991 |
| 38 | 6 | 1.441662  | 0.620011  | 1.422904  |
| 39 | 6 | 1.001340  | 1.868768  | 2.090748  |
| 40 | 1 | 1.189958  | 2.761916  | 1.493667  |
| 41 | 1 | -0.046248 | 1.829168  | 2.401249  |
| 42 | 1 | 1.599812  | 1.962511  | 3.014400  |
| 43 | 6 | 0.837969  | -0.649023 | 1.893946  |
| 44 | 1 | 0.741800  | -0.625074 | 2.987797  |
| 45 | 1 | -0.197842 | -0.735397 | 1.524761  |
| 46 | 1 | 1.394458  | -1.535374 | 1.588802  |
| 47 | 1 | 3.028746  | 0.563874  | -1.541054 |

-----  
mPW1PW91/6-31+G(d,p)//B3LYP/6-31+G(d,p):  
HF = -890.0920925 hartrees (-558541.689 kcal/mol)

MPWB1K/6-31+G(d,p)//B3LYP/6-31+G(d,p):  
HF = -889.8236614 hartrees (-558373.2458 kcal/mol)

M06-2X/6-31+G(d,p)//B3LYP/6-31+G(d,p):  
HF = -889.8837031 hartrees (-558410.9226 kcal/mol)

### TS<sub>E3-C3</sub>

B3LYP/6-31+G(d,p)//B3LYP/6-31+G(d,p):  
HF = -890.2558143 hartrees (-558644.426031393 kcal/mol)

Imaginary Frequencies: 1 (-265.3843 1/cm)

Zero-point correction = 0.403475 (Hartree/Particle)

Coordinates (from last standard orientation):

-----

| Center<br>Number | Atomic<br>Number | Coordinates (Angstroms) |           |           |
|------------------|------------------|-------------------------|-----------|-----------|
|                  |                  | X                       | Y         | Z         |
| 1                | 6                | -2.776490               | 0.141733  | -1.419120 |
| 2                | 6                | -2.181165               | -0.206963 | 0.293117  |
| 3                | 6                | -3.517192               | -0.166892 | 1.037156  |
| 4                | 6                | -4.545268               | 0.194314  | 0.258177  |
| 5                | 6                | -4.226803               | 0.492690  | -1.193661 |
| 6                | 1                | -2.151180               | 0.767620  | -2.056835 |
| 7                | 1                | -5.569167               | 0.264478  | 0.609169  |
| 8                | 1                | -4.436812               | 1.533287  | -1.465219 |
| 9                | 1                | -4.830573               | -0.138762 | -1.862838 |
| 10               | 6                | -0.823209               | -0.086263 | 1.049674  |

|    |   |           |           |           |
|----|---|-----------|-----------|-----------|
| 11 | 1 | -1.091994 | 0.161023  | 2.081387  |
| 12 | 1 | -0.372657 | -1.077033 | 1.072294  |
| 13 | 6 | 0.150475  | 0.964555  | 0.530835  |
| 14 | 6 | 1.529626  | 0.651310  | 0.270943  |
| 15 | 6 | -0.293742 | 2.267354  | 0.367747  |
| 16 | 6 | 2.099947  | -0.630252 | 0.469757  |
| 17 | 6 | 2.383903  | 1.709549  | -0.206310 |
| 18 | 6 | 0.551565  | 3.301461  | -0.095165 |
| 19 | 1 | -1.319801 | 2.528136  | 0.630286  |
| 20 | 6 | 3.438558  | -0.878284 | 0.203888  |
| 21 | 6 | 3.747406  | 1.418087  | -0.474527 |
| 22 | 6 | 1.867174  | 3.018231  | -0.385460 |
| 23 | 1 | 0.162262  | 4.307955  | -0.207366 |
| 24 | 6 | 4.275310  | 0.162011  | -0.280460 |
| 25 | 1 | 4.387695  | 2.217714  | -0.836109 |
| 26 | 1 | 2.532419  | 3.799256  | -0.742678 |
| 27 | 1 | 5.321725  | -0.019933 | -0.491828 |
| 28 | 6 | -3.598248 | -0.515343 | 2.495364  |
| 29 | 1 | -3.060850 | 0.207685  | 3.119301  |
| 30 | 1 | -3.165518 | -1.502330 | 2.696399  |
| 31 | 1 | -4.639728 | -0.525811 | 2.823570  |
| 32 | 8 | 3.866872  | -2.145950 | 0.436016  |
| 33 | 6 | 5.245822  | -2.470846 | 0.237213  |
| 34 | 1 | 5.537822  | -2.338414 | -0.810572 |
| 35 | 1 | 5.338759  | -3.522016 | 0.508706  |
| 36 | 1 | 5.891438  | -1.868493 | 0.885772  |
| 37 | 1 | 1.523390  | -1.460517 | 0.859199  |
| 38 | 6 | -2.222794 | -1.159134 | -0.985728 |
| 39 | 6 | -0.859344 | -1.491558 | -1.594993 |
| 40 | 1 | -0.191947 | -0.629229 | -1.648861 |
| 41 | 1 | -0.357992 | -2.274365 | -1.020459 |
| 42 | 1 | -1.007164 | -1.875546 | -2.609140 |
| 43 | 6 | -3.118801 | -2.394639 | -0.922213 |
| 44 | 1 | -3.241115 | -2.796432 | -1.932480 |
| 45 | 1 | -2.631159 | -3.167658 | -0.321384 |
| 46 | 1 | -4.106972 | -2.210675 | -0.503389 |
| 47 | 1 | -2.216235 | 0.860932  | -0.202460 |

-----  
mPW1PW91/6-31+G(d,p)//B3LYP/6-31+G(d,p):  
HF = -890.0549078 hartrees (-558518.3552 kcal/mol)

MPWB1K/6-31+G(d,p)//B3LYP/6-31+G(d,p):  
HF = -889.788893 hartrees (-558351.4282 kcal/mol)

M06-2X/6-31+G(d,p)//B3LYP/6-31+G(d,p):  
HF = -889.8490828 hartrees (-558389.198 kcal/mol)

**C3**

B3LYP/6-31+G(d,p)//B3LYP/6-31+G(d,p):

HF = -890.3154021 hartrees (-558681.817971771 kcal/mol)

Imaginary Frequencies: none found

Zero-point correction = 0.407196 (Hartree/Particle)

Coordinates (from last standard orientation):

```
-----
```

| Center<br>Number | Atomic<br>Number | Coordinates (Angstroms) |           |           |
|------------------|------------------|-------------------------|-----------|-----------|
|                  |                  | X                       | Y         | Z         |
| 1                | 6                | -3.343916               | -0.709620 | -1.666435 |
| 2                | 6                | -2.073617               | -0.334291 | 0.470794  |
| 3                | 6                | -3.227056               | 0.284727  | 1.047595  |
| 4                | 6                | -4.440197               | 0.165775  | 0.403072  |
| 5                | 6                | -4.651588               | -0.476887 | -0.912844 |
| 6                | 1                | -3.494981               | -1.425644 | -2.479760 |
| 7                | 1                | -5.323685               | 0.553462  | 0.909167  |
| 8                | 1                | -5.359075               | 0.123939  | -1.499268 |
| 9                | 1                | -5.193578               | -1.420789 | -0.725776 |
| 10               | 6                | -0.757857               | -0.215094 | 1.166900  |
| 11               | 1                | -0.869993               | 0.025216  | 2.226028  |
| 12               | 1                | -0.244412               | -1.175673 | 1.105040  |
| 13               | 6                | 0.089041                | 0.853278  | 0.454230  |
| 14               | 6                | 1.481735                | 0.613936  | 0.177004  |
| 15               | 6                | -0.485175               | 2.065963  | 0.093089  |
| 16               | 6                | 2.163414                | -0.571147 | 0.533077  |
| 17               | 6                | 2.227336                | 1.659499  | -0.475057 |
| 18               | 6                | 0.256878                | 3.081567  | -0.546704 |
| 19               | 1                | -1.529306               | 2.260230  | 0.314913  |
| 20               | 6                | 3.519959                | -0.737351 | 0.271308  |
| 21               | 6                | 3.606771                | 1.454565  | -0.733798 |
| 22               | 6                | 1.588788                | 2.874506  | -0.831935 |
| 23               | 1                | -0.224884               | 4.019556  | -0.801703 |
| 24               | 6                | 4.251176                | 0.289994  | -0.376854 |
| 25               | 1                | 4.167396                | 2.248899  | -1.218370 |
| 26               | 1                | 2.172268                | 3.646960  | -1.324965 |
| 27               | 1                | 5.306471                | 0.172189  | -0.589174 |
| 28               | 6                | -3.162717               | 0.991917  | 2.389540  |
| 29               | 1                | -2.404464               | 1.779399  | 2.406031  |
| 30               | 1                | -2.930573               | 0.293232  | 3.200470  |
| 31               | 1                | -4.123528               | 1.456086  | 2.621369  |
| 32               | 8                | 4.057459                | -1.915267 | 0.668397  |
| 33               | 6                | 5.452230                | -2.162682 | 0.458589  |
| 34               | 1                | 5.697648                | -2.158841 | -0.609020 |
| 35               | 1                | 5.635515                | -3.154646 | 0.869959  |

```
-----
```

|    |   |           |           |           |
|----|---|-----------|-----------|-----------|
| 36 | 1 | 6.066967  | -1.427795 | 0.989461  |
| 37 | 1 | 1.665482  | -1.395132 | 1.030646  |
| 38 | 6 | -2.199173 | -1.213852 | -0.758898 |
| 39 | 6 | -0.917247 | -1.313735 | -1.608946 |
| 40 | 1 | -0.626038 | -0.340016 | -2.010183 |
| 41 | 1 | -0.068617 | -1.724231 | -1.057796 |
| 42 | 1 | -1.111293 | -1.985033 | -2.450734 |
| 43 | 6 | -2.521895 | -2.644713 | -0.200753 |
| 44 | 1 | -2.637153 | -3.322810 | -1.051957 |
| 45 | 1 | -1.704604 | -3.023285 | 0.418968  |
| 46 | 1 | -3.439521 | -2.673655 | 0.392165  |
| 47 | 1 | -3.027059 | 0.232380  | -2.130519 |

-----  
mPW1PW91/6-31+G(d,p)//B3LYP/6-31+G(d,p):  
HF = -890.1074366 hartrees (-558551.3176 kcal/mol)

MPWB1K/6-31+G(d,p)//B3LYP/6-31+G(d,p):  
HF = -889.8380938 hartrees (-558382.3022 kcal/mol)

M06-2X/6-31+G(d,p)//B3LYP/6-31+G(d,p):  
HF = -889.8993511 hartrees (-558420.7418 kcal/mol)

#### C4

B3LYP/6-31+G(d,p)//B3LYP/6-31+G(d,p):  
HF = -890.3111114 hartrees (-558679.125514614 kcal/mol)  
Imaginary Frequencies: none found  
Zero-point correction = 0.406825 (Hartree/Particle)

Coordinates (from last standard orientation):

-----  

| Center<br>Number | Atomic<br>Number | Coordinates (Angstroms) |           |           |
|------------------|------------------|-------------------------|-----------|-----------|
|                  |                  | X                       | Y         | Z         |
| 1                | 6                | -3.753079               | -0.033637 | -1.158463 |
| 2                | 6                | -1.894653               | 0.107630  | 0.539915  |
| 3                | 6                | -2.318985               | -1.159781 | 1.049853  |
| 4                | 6                | -3.102347               | -1.964404 | 0.244328  |
| 5                | 6                | -3.715397               | -1.552148 | -1.033549 |
| 6                | 1                | -4.026197               | 0.263107  | -2.174945 |
| 7                | 1                | -3.271185               | -2.990308 | 0.571206  |
| 8                | 1                | -4.714851               | -1.999099 | -1.112722 |
| 9                | 1                | -3.140452               | -2.028946 | -1.847248 |
| 10               | 6                | -0.954794               | 0.927109  | 1.379307  |
| 11               | 1                | -1.587893               | 1.758064  | 1.735518  |
| 12               | 1                | -0.676158               | 0.364235  | 2.270987  |
| 13               | 6                | 0.308203                | 1.548295  | 0.778306  |

|    |   |           |           |           |
|----|---|-----------|-----------|-----------|
| 14 | 6 | 1.386871  | 0.709792  | 0.337731  |
| 15 | 6 | 0.465460  | 2.921724  | 0.784183  |
| 16 | 6 | 1.324702  | -0.703726 | 0.339270  |
| 17 | 6 | 2.592386  | 1.341790  | -0.125792 |
| 18 | 6 | 1.656348  | 3.536874  | 0.330299  |
| 19 | 1 | -0.337256 | 3.553777  | 1.155653  |
| 20 | 6 | 2.387590  | -1.478824 | -0.101013 |
| 21 | 6 | 3.660027  | 0.519776  | -0.571842 |
| 22 | 6 | 2.696465  | 2.757967  | -0.122000 |
| 23 | 1 | 1.741089  | 4.618302  | 0.348667  |
| 24 | 6 | 3.574827  | -0.855399 | -0.566193 |
| 25 | 1 | 4.569883  | 0.996611  | -0.925361 |
| 26 | 1 | 3.616164  | 3.216642  | -0.474009 |
| 27 | 1 | 4.413674  | -1.446383 | -0.912316 |
| 28 | 6 | -1.875814 | -1.692647 | 2.399857  |
| 29 | 1 | -2.182903 | -1.026608 | 3.212020  |
| 30 | 1 | -0.791637 | -1.823918 | 2.466952  |
| 31 | 1 | -2.336000 | -2.664985 | 2.587876  |
| 32 | 8 | 2.205365  | -2.826022 | -0.054092 |
| 33 | 6 | 3.274670  | -3.691830 | -0.448856 |
| 34 | 1 | 3.532752  | -3.547416 | -1.503799 |
| 35 | 1 | 2.898821  | -4.704288 | -0.303403 |
| 36 | 1 | 4.159700  | -3.538760 | 0.178157  |
| 37 | 1 | 0.447488  | -1.229248 | 0.697089  |
| 38 | 6 | -2.408832 | 0.634649  | -0.787455 |
| 39 | 6 | -2.639176 | 2.165153  | -0.757237 |
| 40 | 1 | -3.328746 | 2.451881  | 0.043883  |
| 41 | 1 | -1.710345 | 2.723112  | -0.647231 |
| 42 | 1 | -3.095370 | 2.462555  | -1.705939 |
| 43 | 6 | -1.336335 | 0.313435  | -1.884045 |
| 44 | 1 | -1.741727 | 0.639689  | -2.846711 |
| 45 | 1 | -0.407259 | 0.850674  | -1.699047 |
| 46 | 1 | -1.105744 | -0.753131 | -1.947213 |
| 47 | 1 | -4.537604 | 0.351835  | -0.494943 |

-----  
mPW1PW91/6-31+G(d,p)//B3LYP/6-31+G(d,p):  
HF = -890.1038352 hartrees (-558549.0577 kcal/mol)

MPWB1K/6-31+G(d,p)//B3LYP/6-31+G(d,p):  
HF = -889.8364235 hartrees (-558381.2541 kcal/mol)

M06-2X/6-31+G(d,p)//B3LYP/6-31+G(d,p):  
HF = -889.8982536 hartrees (-558420.0531 kcal/mol)

**TS** <sub>C4-D3</sub>  
B3LYP/6-31+G(d,p)//B3LYP/6-31+G(d,p):



HF = -890.2904828 hartrees (-558666.180861828 kcal/mol)

Imaginary Frequencies: 1 (-205.6426 1/cm)

Zero-point correction = 0.406932 (Hartree/Particle)

Coordinates (from last standard orientation):

```
-----
```

| Center<br>Number | Atomic<br>Number | Coordinates (Angstroms) |           |           |
|------------------|------------------|-------------------------|-----------|-----------|
|                  |                  | X                       | Y         | Z         |
| 1                | 6                | 2.773741                | -1.566559 | -1.225165 |
| 2                | 6                | 1.161380                | -0.657173 | 0.394934  |
| 3                | 6                | 2.270885                | -0.009625 | 1.123132  |
| 4                | 6                | 3.524511                | -0.040010 | 0.597554  |
| 5                | 6                | 3.905340                | -0.692141 | -0.688441 |
| 6                | 1                | 2.938365                | -1.817460 | -2.278196 |
| 7                | 1                | 4.330645                | 0.394069  | 1.186367  |
| 8                | 1                | 4.820984                | -1.277826 | -0.543218 |
| 9                | 1                | 4.176164                | 0.089503  | -1.415131 |
| 10               | 6                | 0.346871                | -1.698504 | 1.181933  |
| 11               | 1                | 0.742274                | -2.688605 | 0.919705  |
| 12               | 1                | 0.531107                | -1.571913 | 2.252990  |
| 13               | 6                | -1.132581               | -1.611657 | 0.868963  |
| 14               | 6                | -1.544169               | -0.316436 | 0.507397  |
| 15               | 6                | -2.035418               | -2.657597 | 0.794030  |
| 16               | 6                | -0.588909               | 0.750420  | 0.652100  |
| 17               | 6                | -2.809177               | -0.100687 | -0.094761 |
| 18               | 6                | -3.343649               | -2.433903 | 0.299503  |
| 19               | 1                | -1.736196               | -3.665640 | 1.068084  |
| 20               | 6                | -0.878959               | 2.005982  | 0.054244  |
| 21               | 6                | -3.048856               | 1.184539  | -0.660086 |
| 22               | 6                | -3.718308               | -1.188657 | -0.171510 |
| 23               | 1                | -4.037987               | -3.265700 | 0.242049  |
| 24               | 6                | -2.105990               | 2.197503  | -0.630515 |
| 25               | 1                | -3.997948               | 1.368149  | -1.157346 |
| 26               | 1                | -4.696310               | -1.040098 | -0.619653 |
| 27               | 1                | -2.337360               | 3.151340  | -1.087941 |
| 28               | 6                | 2.075737                | 0.612455  | 2.492468  |
| 29               | 1                | 1.441682                | 0.018520  | 3.156960  |
| 30               | 1                | 1.625660                | 1.609649  | 2.406136  |
| 31               | 1                | 3.037290                | 0.736651  | 2.994708  |
| 32               | 8                | 0.017726                | 2.974438  | 0.269734  |
| 33               | 6                | -0.240723               | 4.320261  | -0.177303 |
| 34               | 1                | -0.316245               | 4.357003  | -1.267850 |
| 35               | 1                | 0.619577                | 4.900354  | 0.152170  |
| 36               | 1                | -1.152065               | 4.710134  | 0.284959  |
| 37               | 1                | -0.058645               | 0.835843  | 1.592452  |

```
-----
```

S41

|    |   |           |           |           |
|----|---|-----------|-----------|-----------|
| 38 | 6 | 1.376864  | -0.867054 | -1.118260 |
| 39 | 6 | 0.349159  | -1.781783 | -1.810200 |
| 40 | 1 | 0.300495  | -2.779285 | -1.364615 |
| 41 | 1 | -0.655500 | -1.355485 | -1.807735 |
| 42 | 1 | 0.647735  | -1.908651 | -2.855363 |
| 43 | 6 | 1.426872  | 0.470949  | -1.894754 |
| 44 | 1 | 1.864247  | 0.302301  | -2.883639 |
| 45 | 1 | 0.416620  | 0.858614  | -2.043687 |
| 46 | 1 | 2.013921  | 1.237858  | -1.385199 |
| 47 | 1 | 2.751966  | -2.516776 | -0.676468 |

-----  
mPW1PW91/6-31+G(d,p)//B3LYP/6-31+G(d,p):  
HF = -890.0867056 hartrees (-558538.3087 kcal/mol)

MPWB1K/6-31+G(d,p)//B3LYP/6-31+G(d,p):  
HF = -889.818487 hartrees (-558369.9988 kcal/mol)

M06-2X/6-31+G(d,p)//B3LYP/6-31+G(d,p):  
HF = -889.8821463 hartrees (-558409.9456 kcal/mol)

### D3

B3LYP/6-31+G(d,p)//B3LYP/6-31+G(d,p):  
HF = -890.3090691 hartrees (-558677.843950941 kcal/mol)

Imaginary Frequencies: none found

Zero-point correction = 0.409262 (Hartree/Particle)

Coordinates (from last standard orientation):

-----

| Center<br>Number | Atomic<br>Number | Coordinates (Angstroms) |           |           |
|------------------|------------------|-------------------------|-----------|-----------|
|                  |                  | X                       | Y         | Z         |
| 1                | 6                | 2.352654                | -1.856456 | -1.221070 |
| 2                | 6                | 0.815534                | -0.601459 | 0.353709  |
| 3                | 6                | 2.061273                | -0.350157 | 1.216038  |
| 4                | 6                | 3.286340                | -0.731739 | 0.816235  |
| 5                | 6                | 3.612156                | -1.387037 | -0.491638 |
| 6                | 1                | 2.579987                | -2.070052 | -2.271470 |
| 7                | 1                | 4.122513                | -0.556007 | 1.491026  |
| 8                | 1                | 4.288052                | -2.233867 | -0.320477 |
| 9                | 1                | 4.185190                | -0.684064 | -1.114358 |
| 10               | 6                | 0.007785                | -1.845641 | 0.931211  |
| 11               | 1                | 0.342655                | -2.783222 | 0.483500  |
| 12               | 1                | 0.190393                | -1.935219 | 2.008719  |
| 13               | 6                | -1.451327               | -1.548125 | 0.664481  |
| 14               | 6                | -1.591904               | -0.193461 | 0.403642  |
| 15               | 6                | -2.584296               | -2.355792 | 0.583164  |

S42

|    |   |           |           |           |
|----|---|-----------|-----------|-----------|
| 16 | 6 | -0.312496 | 0.534322  | 0.586077  |
| 17 | 6 | -2.793937 | 0.388616  | -0.029659 |
| 18 | 6 | -3.825259 | -1.789586 | 0.207886  |
| 19 | 1 | -2.525450 | -3.422156 | 0.782937  |
| 20 | 6 | -0.331841 | 1.921876  | 0.051703  |
| 21 | 6 | -2.715445 | 1.746106  | -0.450698 |
| 22 | 6 | -3.940130 | -0.443818 | -0.115462 |
| 23 | 1 | -4.698326 | -2.430695 | 0.143810  |
| 24 | 6 | -1.533680 | 2.480550  | -0.434940 |
| 25 | 1 | -3.614191 | 2.233700  | -0.822654 |
| 26 | 1 | -4.889459 | -0.034948 | -0.447992 |
| 27 | 1 | -1.553183 | 3.506708  | -0.779950 |
| 28 | 6 | 1.889584  | 0.272795  | 2.585737  |
| 29 | 1 | 1.135301  | -0.238940 | 3.197598  |
| 30 | 1 | 1.602136  | 1.331573  | 2.527489  |
| 31 | 1 | 2.828524  | 0.229895  | 3.142348  |
| 32 | 8 | 0.775711  | 2.601002  | 0.222648  |
| 33 | 6 | 0.869466  | 4.007837  | -0.121424 |
| 34 | 1 | 0.711101  | 4.140362  | -1.194144 |
| 35 | 1 | 1.884463  | 4.292740  | 0.146909  |
| 36 | 1 | 0.146273  | 4.584980  | 0.459424  |
| 37 | 1 | -0.239869 | 0.735769  | 1.672204  |
| 38 | 6 | 1.200653  | -0.816373 | -1.172761 |
| 39 | 6 | 0.047372  | -1.357231 | -2.044668 |
| 40 | 1 | -0.313319 | -2.336043 | -1.717757 |
| 41 | 1 | -0.808399 | -0.675905 | -2.084669 |
| 42 | 1 | 0.408431  | -1.475020 | -3.071525 |
| 43 | 6 | 1.695129  | 0.487768  | -1.839374 |
| 44 | 1 | 2.168234  | 0.247913  | -2.797038 |
| 45 | 1 | 0.862740  | 1.161640  | -2.069405 |
| 46 | 1 | 2.420054  | 1.029113  | -1.228706 |
| 47 | 1 | 2.014673  | -2.804253 | -0.786159 |

-----  
 mPW1PW91/6-31+G(d,p)//B3LYP/6-31+G(d,p):  
 HF = -890.1111592 hartrees (-558553.6535 kcal/mol)

MPWB1K/6-31+G(d,p)//B3LYP/6-31+G(d,p):  
 HF = -889.8487782 hartrees (-558389.0068 kcal/mol)

M06-2X/6-31+G(d,p)//B3LYP/6-31+G(d,p):  
 HF = -889.9103238 hartrees (-558427.6273 kcal/mol)

**Table S4 (v).** Coordinates and Energies. Path 4: **E4**→**D4**

The coordinates below are those for the enantiomer of the structure presented in Figure S10 (V).

**E4**

B3LYP/6-31+G(d,p)//B3LYP/6-31+G(d,p):

HF = -890.2877709 hartrees (-558664.479117459 kcal/mol)

Imaginary Frequencies: none found

Zero-point correction = 0.403506 (Hartree/Particle)

Coordinates (from last standard orientation):

| -----  |        |                         |           |           |
|--------|--------|-------------------------|-----------|-----------|
| Center | Atomic | Coordinates (Angstroms) |           |           |
| Number | Number | X                       | Y         | Z         |
| -----  |        |                         |           |           |
| 1      | 6      | -3.400785               | -0.558202 | 0.362158  |
| 2      | 6      | -2.035947               | 0.303271  | 0.687256  |
| 3      | 6      | -1.467144               | -0.536122 | 1.825348  |
| 4      | 6      | -1.979334               | -1.774263 | 1.834041  |
| 5      | 6      | -3.032528               | -1.998557 | 0.776910  |
| 6      | 1      | -4.099313               | -0.136773 | 1.097465  |
| 7      | 1      | -1.688314               | -2.553300 | 2.531197  |
| 8      | 1      | -3.916344               | -2.521224 | 1.161221  |
| 9      | 1      | -2.647906               | -2.608417 | -0.051466 |
| 10     | 6      | -1.129287               | 0.429698  | -0.563294 |
| 11     | 1      | -0.861498               | -0.568300 | -0.916181 |
| 12     | 1      | -1.726052               | 0.893959  | -1.365066 |
| 13     | 6      | 0.099293                | 1.276166  | -0.333894 |
| 14     | 6      | 1.428223                | 0.720777  | -0.301590 |
| 15     | 6      | -0.065852               | 2.647807  | -0.173185 |
| 16     | 6      | 1.704033                | -0.657533 | -0.449473 |
| 17     | 6      | 2.537537                | 1.619100  | -0.106670 |
| 18     | 6      | 1.023085                | 3.517805  | 0.027012  |
| 19     | 1      | -1.067226               | 3.070531  | -0.220055 |
| 20     | 6      | 3.006575                | -1.145538 | -0.423618 |
| 21     | 6      | 3.853680                | 1.087342  | -0.084071 |
| 22     | 6      | 2.305862                | 3.006690  | 0.058376  |
| 23     | 1      | 0.850915                | 4.582701  | 0.143646  |
| 24     | 6      | 4.098460                | -0.259527 | -0.239487 |
| 25     | 1      | 4.687181                | 1.769082  | 0.059800  |
| 26     | 1      | 3.156467                | 3.666418  | 0.205542  |
| 27     | 1      | 5.116738                | -0.627360 | -0.218718 |
| 28     | 6      | -0.470081               | 0.028510  | 2.796892  |
| 29     | 1      | -0.870955               | 0.923655  | 3.287748  |
| 30     | 1      | 0.459837                | 0.324501  | 2.302633  |
| 31     | 1      | -0.231656               | -0.706304 | 3.570009  |
| 32     | 8      | 3.138015                | -2.486703 | -0.580193 |

|    |   |           |           |           |
|----|---|-----------|-----------|-----------|
| 33 | 6 | 4.443995  | -3.071385 | -0.580543 |
| 34 | 1 | 5.053289  | -2.676659 | -1.400979 |
| 35 | 1 | 4.284528  | -4.139082 | -0.728140 |
| 36 | 1 | 4.951358  | -2.907171 | 0.376532  |
| 37 | 6 | -3.926837 | -0.267662 | -0.960976 |
| 38 | 6 | -4.697656 | 0.977439  | -1.180258 |
| 39 | 1 | -4.678153 | 1.658812  | -0.328343 |
| 40 | 1 | -4.374889 | 1.491169  | -2.093842 |
| 41 | 1 | -5.747701 | 0.694035  | -1.369489 |
| 42 | 6 | -3.791581 | -1.209401 | -2.092864 |
| 43 | 1 | -4.552675 | -1.998252 | -1.954881 |
| 44 | 1 | -3.972841 | -0.741335 | -3.062192 |
| 45 | 1 | -2.831472 | -1.733970 | -2.087492 |
| 46 | 1 | -2.333594 | 1.304667  | 1.016095  |
| 47 | 1 | 0.913884  | -1.386241 | -0.581906 |

-----  
 mPW1PW91/6-31+G(d,p)//B3LYP/6-31+G(d,p):  
 HF = -890.0784368 hartrees (-558533.1198 kcal/mol)

MPWB1K/6-31+G(d,p)//B3LYP/6-31+G(d,p):  
 HF = -889.8058285 hartrees (-558362.0554 kcal/mol)

M06-2X/6-31+G(d,p)//B3LYP/6-31+G(d,p):  
 HF = -889.8665476 hartrees (-558400.1573 kcal/mol)

**TS** <sub>E4-C5</sub>

B3LYP/6-31+G(d,p)//B3LYP/6-31+G(d,p):  
 HF = -890.2562821 hartrees (-558644.719580571 kcal/mol)

Imaginary Frequencies: 1 (-276.0604 1/cm)

Zero-point correction = 0.403139 (Hartree/Particle)

Coordinates (from last standard orientation):

-----  

| Center<br>Number | Atomic<br>Number | Coordinates (Angstroms) |           |           |
|------------------|------------------|-------------------------|-----------|-----------|
|                  |                  | X                       | Y         | Z         |
| 1                | 6                | -3.870263               | 0.452060  | -0.290308 |
| 2                | 6                | -2.119240               | -0.167990 | -0.138644 |
| 3                | 6                | -2.060376               | -0.347872 | 1.378859  |
| 4                | 6                | -3.157231               | 0.087970  | 2.011223  |
| 5                | 6                | -4.255903               | 0.673031  | 1.147059  |
| 6                | 1                | -4.081180               | 1.222763  | -1.032503 |
| 7                | 1                | -3.297849               | 0.022335  | 3.084580  |
| 8                | 1                | -4.441077               | 1.732633  | 1.356176  |
| 9                | 1                | -5.206449               | 0.143854  | 1.318196  |

|    |   |           |           |           |
|----|---|-----------|-----------|-----------|
| 10 | 6 | -0.825976 | -0.156561 | -0.991360 |
| 11 | 1 | -0.413675 | -1.161473 | -0.872510 |
| 12 | 1 | -1.088128 | -0.063853 | -2.047182 |
| 13 | 6 | 0.183687  | 0.918545  | -0.614392 |
| 14 | 6 | 1.556798  | 0.594079  | -0.335707 |
| 15 | 6 | -0.216214 | 2.243127  | -0.599726 |
| 16 | 6 | 2.079508  | -0.722893 | -0.366879 |
| 17 | 6 | 2.454748  | 1.674331  | -0.014672 |
| 18 | 6 | 0.669438  | 3.299080  | -0.287005 |
| 19 | 1 | -1.242925 | 2.505815  | -0.856723 |
| 20 | 6 | 3.413367  | -0.981296 | -0.086984 |
| 21 | 6 | 3.812404  | 1.372539  | 0.269951  |
| 22 | 6 | 1.983004  | 3.011906  | 0.006530  |
| 23 | 1 | 0.311185  | 4.323131  | -0.285942 |
| 24 | 6 | 4.294005  | 0.083418  | 0.240042  |
| 25 | 1 | 4.485366  | 2.189686  | 0.513935  |
| 26 | 1 | 2.679415  | 3.809079  | 0.250842  |
| 27 | 1 | 5.337023  | -0.106271 | 0.461201  |
| 28 | 6 | -0.870159 | -0.992321 | 2.025425  |
| 29 | 1 | 0.050643  | -0.438207 | 1.822826  |
| 30 | 1 | -0.722787 | -2.012939 | 1.651377  |
| 31 | 1 | -1.011277 | -1.045411 | 3.106900  |
| 32 | 8 | 3.792919  | -2.284257 | -0.148925 |
| 33 | 6 | 5.160621  | -2.631114 | 0.084432  |
| 34 | 1 | 5.821712  | -2.147417 | -0.643157 |
| 35 | 1 | 5.212027  | -3.712182 | -0.042422 |
| 36 | 1 | 5.468697  | -2.369585 | 1.103007  |
| 37 | 6 | -3.403633 | -0.861758 | -0.784602 |
| 38 | 6 | -3.402374 | -0.976892 | -2.312618 |
| 39 | 1 | -3.122174 | -0.046846 | -2.815169 |
| 40 | 1 | -2.723980 | -1.766605 | -2.645715 |
| 41 | 1 | -4.408772 | -1.243916 | -2.649421 |
| 42 | 6 | -3.907236 | -2.151833 | -0.137887 |
| 43 | 1 | -4.920797 | -2.358707 | -0.493692 |
| 44 | 1 | -3.274431 | -2.987069 | -0.451108 |
| 45 | 1 | -3.923360 | -2.125280 | 0.950508  |
| 46 | 1 | -2.412012 | 0.971764  | -0.182645 |
| 47 | 1 | 1.467601  | -1.578571 | -0.626379 |

-----  
 mPW1PW91/6-31+G(d,p)//B3LYP/6-31+G(d,p):  
 HF = -890.0547798 hartrees (-558518.2749 kcal/mol)

MPWB1K/6-31+G(d,p)//B3LYP/6-31+G(d,p):  
 HF = -889.788102 hartrees (-558350.9319 kcal/mol)

M06-2X/6-31+G(d,p)//B3LYP/6-31+G(d,p):

HF = -889.848461 hartrees (-558388.8077 kcal/mol)

**C5**

B3LYP/6-31+G(d,p)//B3LYP/6-31+G(d,p):

HF = -890.3153434 hartrees (-558681.781136934 kcal/mol)

Imaginary Frequencies: none found

Zero-point correction = 0.406531 (Hartree/Particle)

Coordinates (from last standard orientation):

```
-----
```

| Center<br>Number | Atomic<br>Number | Coordinates (Angstroms) |           |           |
|------------------|------------------|-------------------------|-----------|-----------|
|                  |                  | X                       | Y         | Z         |
| 1                | 6                | -4.507831               | 0.184581  | -0.048118 |
| 2                | 6                | -2.050399               | -0.404124 | -0.089167 |
| 3                | 6                | -2.096289               | -0.645004 | 1.317185  |
| 4                | 6                | -3.328855               | -0.788884 | 1.921437  |
| 5                | 6                | -4.638260               | -0.579914 | 1.265985  |
| 6                | 1                | -3.344147               | -1.120753 | 2.958910  |
| 7                | 1                | -5.316032               | -0.072597 | 1.964905  |
| 8                | 1                | -5.094127               | -1.575791 | 1.125363  |
| 9                | 6                | -0.727910               | -0.441578 | -0.788286 |
| 10               | 1                | -0.247274               | -1.382363 | -0.495690 |
| 11               | 1                | -0.843865               | -0.480737 | -1.873021 |
| 12               | 6                | 0.178824                | 0.720175  | -0.380857 |
| 13               | 6                | 1.590152                | 0.515393  | -0.188020 |
| 14               | 6                | -0.358739               | 1.991270  | -0.227124 |
| 15               | 6                | 2.231317                | -0.734540 | -0.341323 |
| 16               | 6                | 2.394735                | 1.657877  | 0.160312  |
| 17               | 6                | 0.438155                | 3.101647  | 0.122458  |
| 18               | 1                | -1.418777               | 2.151373  | -0.395944 |
| 19               | 6                | 3.605785                | -0.871379 | -0.175782 |
| 20               | 6                | 3.792079                | 1.481574  | 0.329578  |
| 21               | 6                | 1.792188                | 2.932306  | 0.316462  |
| 22               | 1                | -0.017097               | 4.081385  | 0.221607  |
| 23               | 6                | 4.397046                | 0.254139  | 0.168737  |
| 24               | 1                | 4.397535                | 2.346730  | 0.584577  |
| 25               | 1                | 2.419846                | 3.778964  | 0.580023  |
| 26               | 1                | 5.467425                | 0.160203  | 0.303157  |
| 27               | 6                | -0.844648               | -0.869153 | 2.138509  |
| 28               | 1                | -0.241340               | 0.040369  | 2.198589  |
| 29               | 1                | -0.208302               | -1.652002 | 1.714191  |
| 30               | 1                | -1.106621               | -1.170410 | 3.154757  |
| 31               | 8                | 4.102439                | -2.118298 | -0.359688 |
| 32               | 6                | 5.509937                | -2.344949 | -0.227487 |
| 33               | 1                | 6.074774                | -1.752421 | -0.955304 |
| 34               | 1                | 5.653282                | -3.405228 | -0.432736 |

```
-----
```

|    |   |           |           |           |
|----|---|-----------|-----------|-----------|
| 35 | 1 | 5.852226  | -2.119900 | 0.788537  |
| 36 | 6 | -3.319279 | -0.287122 | -0.913148 |
| 37 | 6 | -3.199920 | 0.675175  | -2.119150 |
| 38 | 1 | -3.005392 | 1.703578  | -1.803757 |
| 39 | 1 | -2.428480 | 0.380423  | -2.833030 |
| 40 | 1 | -4.153784 | 0.672996  | -2.654638 |
| 41 | 6 | -3.564028 | -1.732768 | -1.468755 |
| 42 | 1 | -4.466014 | -1.711421 | -2.088354 |
| 43 | 1 | -2.734884 | -2.066517 | -2.098328 |
| 44 | 1 | -3.706734 | -2.468560 | -0.672943 |
| 45 | 1 | 1.684750  | -1.633785 | -0.601707 |
| 46 | 1 | -5.430624 | 0.105240  | -0.630355 |
| 47 | 1 | -4.370212 | 1.249268  | 0.178019  |

-----  
mPW1PW91/6-31+G(d,p)//B3LYP/6-31+G(d,p):  
HF = -890.1070952 hartrees (-558551.1033 kcal/mol)

MPWB1K/6-31+G(d,p)//B3LYP/6-31+G(d,p):  
HF = -889.8370249 hartrees (-558381.6315 kcal/mol)

M06-2X/6-31+G(d,p)//B3LYP/6-31+G(d,p):  
HF = -889.898307 hartrees (-558420.0867 kcal/mol)

## C6

B3LYP/6-31+G(d,p)//B3LYP/6-31+G(d,p):  
HF = -890.3105636 hartrees (-558678.781764636 kcal/mol)  
Imaginary Frequencies: none found  
Zero-point correction = 0.406260 (Hartree/Particle)

Coordinates (from last standard orientation):

-----  

| Center<br>Number | Atomic<br>Number | Coordinates (Angstroms) |           |           |
|------------------|------------------|-------------------------|-----------|-----------|
|                  |                  | X                       | Y         | Z         |
| 1                | 6                | 4.018170                | 0.702426  | 0.188033  |
| 2                | 6                | 1.837898                | -0.571937 | -0.046867 |
| 3                | 6                | 1.720666                | -0.528731 | 1.371900  |
| 4                | 6                | 2.401948                | 0.477629  | 2.032707  |
| 5                | 6                | 3.420969                | 1.360813  | 1.426685  |
| 6                | 1                | 4.675875                | 1.397153  | -0.341536 |
| 7                | 1                | 2.154219                | 0.639529  | 3.081991  |
| 8                | 1                | 4.186801                | 1.593151  | 2.176959  |
| 9                | 1                | 2.948269                | 2.333364  | 1.204890  |
| 10               | 6                | 0.911838                | -1.391109 | -0.896137 |
| 11               | 1                | 0.932900                | -0.989524 | -1.915247 |



|    |   |           |           |           |
|----|---|-----------|-----------|-----------|
| 12 | 1 | 1.445598  | -2.355813 | -0.983267 |
| 13 | 6 | -0.523909 | -1.689377 | -0.496388 |
| 14 | 6 | -1.483993 | -0.640856 | -0.289015 |
| 15 | 6 | -0.932334 | -3.010013 | -0.435059 |
| 16 | 6 | -1.164826 | 0.735138  | -0.362546 |
| 17 | 6 | -2.842655 | -1.011059 | 0.006431  |
| 18 | 6 | -2.269809 | -3.367182 | -0.148212 |
| 19 | 1 | -0.209840 | -3.803235 | -0.613291 |
| 20 | 6 | -2.122311 | 1.717425  | -0.155968 |
| 21 | 6 | -3.797496 | 0.018268  | 0.215151  |
| 22 | 6 | -3.205268 | -2.381738 | 0.074347  |
| 23 | 1 | -2.549387 | -4.414750 | -0.109688 |
| 24 | 6 | -3.461334 | 1.352153  | 0.140440  |
| 25 | 1 | -4.823507 | -0.262083 | 0.436148  |
| 26 | 1 | -4.236681 | -2.640486 | 0.296605  |
| 27 | 1 | -4.220659 | 2.107001  | 0.302506  |
| 28 | 6 | 0.825332  | -1.446766 | 2.178463  |
| 29 | 1 | 0.913170  | -2.483345 | 1.847794  |
| 30 | 1 | -0.228499 | -1.167985 | 2.107580  |
| 31 | 1 | 1.121674  | -1.406939 | 3.229834  |
| 32 | 8 | -1.689830 | 3.004025  | -0.253274 |
| 33 | 6 | -2.633441 | 4.071715  | -0.116872 |
| 34 | 1 | -3.415675 | 4.007730  | -0.880982 |
| 35 | 1 | -2.060650 | 4.987522  | -0.260931 |
| 36 | 1 | -3.084408 | 4.077778  | 0.881641  |
| 37 | 6 | 2.937376  | 0.184599  | -0.784920 |
| 38 | 6 | 3.634788  | -0.753316 | -1.810998 |
| 39 | 1 | 4.022976  | -1.656641 | -1.330162 |
| 40 | 1 | 2.983270  | -1.045838 | -2.636470 |
| 41 | 1 | 4.483852  | -0.213365 | -2.240297 |
| 42 | 6 | 2.309421  | 1.384209  | -1.563426 |
| 43 | 1 | 3.109345  | 1.881412  | -2.119567 |
| 44 | 1 | 1.555992  | 1.058540  | -2.283813 |
| 45 | 1 | 1.849258  | 2.122374  | -0.901205 |
| 46 | 1 | 4.641899  | -0.139919 | 0.512079  |
| 47 | 1 | -0.163339 | 1.068424  | -0.601882 |

-----  
 mPW1PW91/6-31+G(d,p)//B3LYP/6-31+G(d,p):  
 HF = -890.103294 hartrees (-558548.718 kcal/mol)

MPWB1K/6-31+G(d,p)//B3LYP/6-31+G(d,p):  
 HF = -889.8354026 hartrees (-558380.6135 kcal/mol)

M06-2X/6-31+G(d,p)//B3LYP/6-31+G(d,p):  
 HF = -889.8972783 hartrees (-558419.4411 kcal/mol)

**TS** <sub>C6-D4</sub>

B3LYP/6-31+G(d,p)//B3LYP/6-31+G(d,p):

HF = -890.2879297 hartrees (-558664.578766047 kcal/mol)

Imaginary Frequencies: 1 (-233.3395 1/cm)

Zero-point correction = 0.407138 (Hartree/Particle)

Coordinates (from last standard orientation):

```
-----
```

| Center | Atomic | Coordinates (Angstroms) |           |           |
|--------|--------|-------------------------|-----------|-----------|
| Number | Number | X                       | Y         | Z         |
| 1      | 6      | 3.540554                | -1.028498 | -0.236678 |
| 2      | 6      | 1.105943                | -0.703496 | -0.100390 |
| 3      | 6      | 1.183157                | -0.745899 | 1.376803  |
| 4      | 6      | 2.403687                | -0.780664 | 1.972833  |
| 5      | 6      | 3.718602                | -0.799784 | 1.264055  |
| 6      | 1      | 4.451386                | -0.766335 | -0.785754 |
| 7      | 1      | 2.431888                | -0.871081 | 3.057407  |
| 8      | 1      | 4.355890                | -1.575450 | 1.705690  |
| 9      | 1      | 4.243669                | 0.147972  | 1.457148  |
| 10     | 6      | 0.339002                | -1.853658 | -0.788456 |
| 11     | 1      | 0.599265                | -1.879114 | -1.848565 |
| 12     | 1      | 0.687268                | -2.798718 | -0.353334 |
| 13     | 6      | -1.155456               | -1.715569 | -0.630048 |
| 14     | 6      | -1.577086               | -0.387704 | -0.462894 |
| 15     | 6      | -2.077614               | -2.747640 | -0.551316 |
| 16     | 6      | -0.576812               | 0.653058  | -0.584800 |
| 17     | 6      | -2.903734               | -0.113053 | -0.043470 |
| 18     | 6      | -3.431180               | -2.471481 | -0.250914 |
| 19     | 1      | -1.759781               | -3.778567 | -0.681293 |
| 20     | 6      | -0.928077               | 1.954545  | -0.105967 |
| 21     | 6      | -3.189633               | 1.211792  | 0.388318  |
| 22     | 6      | -3.836591               | -1.179366 | 0.030959  |
| 23     | 1      | -4.141481               | -3.289429 | -0.191050 |
| 24     | 6      | -2.226831               | 2.202406  | 0.409086  |
| 25     | 1      | -4.188805               | 1.442454  | 0.749077  |
| 26     | 1      | -4.857761               | -0.975795 | 0.339322  |
| 27     | 1      | -2.490318               | 3.188977  | 0.768163  |
| 28     | 6      | -0.051457               | -0.891404 | 2.238502  |
| 29     | 1      | -0.622906               | -1.794735 | 2.004851  |
| 30     | 1      | -0.727269               | -0.039273 | 2.113377  |
| 31     | 1      | 0.232910                | -0.942572 | 3.291652  |
| 32     | 8      | -0.022250               | 2.918926  | -0.269046 |
| 33     | 6      | -0.333430               | 4.290575  | 0.050326  |
| 34     | 1      | -1.179155               | 4.641988  | -0.547252 |

```
-----
```

S50

|    |   |           |           |           |
|----|---|-----------|-----------|-----------|
| 35 | 1 | 0.562895  | 4.851441  | -0.208842 |
| 36 | 1 | -0.542309 | 4.399446  | 1.118141  |
| 37 | 6 | 2.370029  | -0.171360 | -0.818741 |
| 38 | 6 | 2.369873  | -0.350786 | -2.350506 |
| 39 | 1 | 2.420589  | -1.398653 | -2.660179 |
| 40 | 1 | 1.499936  | 0.107476  | -2.835185 |
| 41 | 1 | 3.254473  | 0.145658  | -2.759936 |
| 42 | 6 | 2.652388  | 1.319998  | -0.520926 |
| 43 | 1 | 3.689767  | 1.548832  | -0.784226 |
| 44 | 1 | 2.009089  | 1.965120  | -1.120265 |
| 45 | 1 | 2.498673  | 1.582951  | 0.527153  |
| 46 | 1 | 3.353501  | -2.092609 | -0.428235 |
| 47 | 1 | 0.024581  | 0.676526  | -1.490153 |

-----  
mPW1PW91/6-31+G(d,p)//B3LYP/6-31+G(d,p):  
HF = -890.0844818 hartrees (-558536.9132 kcal/mol)

MPWB1K/6-31+G(d,p)//B3LYP/6-31+G(d,p):  
HF = -889.8163918 hartrees (-558368.684 kcal/mol)

M06-2X/6-31+G(d,p)//B3LYP/6-31+G(d,p):  
HF = -889.8800655 hartrees (-558408.6399 kcal/mol)

#### D4

B3LYP/6-31+G(d,p)//B3LYP/6-31+G(d,p):  
HF = -890.3092784 hartrees (-558677.975288784 kcal/mol)

Imaginary Frequencies: none found

Zero-point correction = 0.408866 (Hartree/Particle)

Coordinates (from last standard orientation):

-----

| Center<br>Number | Atomic<br>Number | Coordinates (Angstroms) |           |           |
|------------------|------------------|-------------------------|-----------|-----------|
|                  |                  | X                       | Y         | Z         |
| 1                | 6                | 3.122954                | -1.557879 | -0.332695 |
| 2                | 6                | 0.807366                | -0.609121 | 0.024500  |
| 3                | 6                | 1.283528                | -0.210798 | 1.427052  |
| 4                | 6                | 2.564692                | -0.362714 | 1.805214  |
| 5                | 6                | 3.666603                | -0.904980 | 0.941942  |
| 6                | 1                | 3.932813                | -1.717937 | -1.053357 |
| 7                | 1                | 2.831147                | -0.102775 | 2.828727  |
| 8                | 1                | 4.251185                | -1.632966 | 1.517994  |
| 9                | 1                | 4.374119                | -0.099011 | 0.698153  |
| 10               | 6                | 0.034184                | -2.002779 | 0.148560  |
| 11               | 1                | 0.352594                | -2.702174 | -0.626895 |

S51

|    |   |           |           |           |
|----|---|-----------|-----------|-----------|
| 12 | 1 | 0.261811  | -2.480196 | 1.106622  |
| 13 | 6 | -1.436753 | -1.699392 | 0.029843  |
| 14 | 6 | -1.630084 | -0.360021 | -0.254916 |
| 15 | 6 | -2.561670 | -2.507698 | 0.227040  |
| 16 | 6 | -0.352814 | 0.366928  | -0.504242 |
| 17 | 6 | -2.901896 | 0.241093  | -0.255356 |
| 18 | 6 | -3.853493 | -1.949274 | 0.146032  |
| 19 | 1 | -2.450897 | -3.562602 | 0.462497  |
| 20 | 6 | -0.488535 | 1.832676  | -0.225449 |
| 21 | 6 | -2.925719 | 1.664945  | -0.285697 |
| 22 | 6 | -4.035486 | -0.587738 | -0.073136 |
| 23 | 1 | -4.717562 | -2.588498 | 0.294427  |
| 24 | 6 | -1.770491 | 2.432536  | -0.235175 |
| 25 | 1 | -3.885238 | 2.177518  | -0.281100 |
| 26 | 1 | -5.032360 | -0.157159 | -0.074380 |
| 27 | 1 | -1.860638 | 3.509662  | -0.174446 |
| 28 | 6 | 0.242923  | 0.215851  | 2.437421  |
| 29 | 1 | -0.503218 | -0.569133 | 2.612822  |
| 30 | 1 | -0.316503 | 1.110880  | 2.132180  |
| 31 | 1 | 0.709375  | 0.443214  | 3.399041  |
| 32 | 8 | 0.620097  | 2.509645  | -0.109952 |
| 33 | 6 | 0.632155  | 3.956718  | 0.023403  |
| 34 | 1 | 0.193200  | 4.416761  | -0.864636 |
| 35 | 1 | 1.685115  | 4.217475  | 0.103952  |
| 36 | 1 | 0.097210  | 4.251420  | 0.928758  |
| 37 | 6 | 2.013232  | -0.711472 | -1.002480 |
| 38 | 6 | 1.616954  | -1.388918 | -2.334397 |
| 39 | 1 | 1.432465  | -2.462051 | -2.236895 |
| 40 | 1 | 0.730230  | -0.940963 | -2.801352 |
| 41 | 1 | 2.436224  | -1.276172 | -3.050992 |
| 42 | 6 | 2.597527  | 0.673708  | -1.362296 |
| 43 | 1 | 3.522201  | 0.535421  | -1.931924 |
| 44 | 1 | 1.918857  | 1.249560  | -2.000655 |
| 45 | 1 | 2.826186  | 1.276281  | -0.482803 |
| 46 | 1 | 2.726467  | -2.551800 | -0.090145 |
| 47 | 1 | -0.226614 | 0.388058  | -1.606984 |

-----  
 mPW1PW91/6-31+G(d,p)//B3LYP/6-31+G(d,p):  
 HF = -890.1110984 hartrees (-558553.6154 kcal/mol)

MPWB1K/6-31+G(d,p)//B3LYP/6-31+G(d,p):  
 HF = -889.8483977 hartrees (-558388.7681 kcal/mol)

M06-2X/6-31+G(d,p)//B3LYP/6-31+G(d,p):  
 HF = -889.9098311 hartrees (-558427.3181 kcal/mol)

**Table S4 (vi).** Coordinates and Energies. *si*→*re* Facial 1,3-hydride shift  
*The coordinates below are those for the enantiomer of the structure presented in Figure S10 (vi).*

Top

B3LYP/6-31+G(d,p)//B3LYP/6-31+G(d,p):

HF = -890.2468963 hartrees (-558638.829897213 kcal/mol)

Imaginary Frequencies: 2 (-301.2649 1/cm) (-7.0672 1/cm)

Zero-point correction = 0.403220 (Hartree/Particle)

Coordinates (from last standard orientation):

| Center<br>Number | Atomic<br>Number | Coordinates (Angstroms) |           |           |
|------------------|------------------|-------------------------|-----------|-----------|
|                  |                  | X                       | Y         | Z         |
| 1                | 6                | -3.272693               | -0.751417 | 0.958059  |
| 2                | 6                | -1.875218               | -0.309269 | 1.201997  |
| 3                | 6                | -1.977736               | -0.447861 | -0.382095 |
| 4                | 6                | -2.651998               | 0.764915  | -1.054410 |
| 5                | 6                | -3.840489               | 1.086599  | -0.524750 |
| 6                | 6                | -4.355964               | 0.225526  | 0.605889  |
| 7                | 1                | -3.521794               | -1.781586 | 1.216734  |
| 8                | 1                | -4.441284               | 1.917930  | -0.877586 |
| 9                | 1                | -4.554841               | 0.836006  | 1.500931  |
| 10               | 1                | -5.295071               | -0.277429 | 0.349794  |
| 11               | 6                | -1.633552               | 1.078328  | 1.794810  |
| 12               | 1                | -1.926777               | 1.069210  | 2.849244  |
| 13               | 1                | -0.568186               | 1.311530  | 1.746579  |
| 14               | 1                | -2.178692               | 1.876609  | 1.292088  |
| 15               | 6                | -1.059506               | -1.376433 | 1.939795  |
| 16               | 1                | 0.002758                | -1.135511 | 1.936841  |
| 17               | 1                | -1.396692               | -1.405829 | 2.981319  |
| 18               | 1                | -1.180506               | -2.375749 | 1.514431  |
| 19               | 6                | -0.976120               | -1.343687 | -1.217177 |
| 20               | 1                | -0.913092               | -0.802463 | -2.168087 |
| 21               | 1                | -1.470484               | -2.286279 | -1.464486 |
| 22               | 6                | 0.424709                | -1.675192 | -0.741519 |
| 23               | 6                | 1.393603                | -0.685088 | -0.361071 |
| 24               | 6                | 0.783082                | -3.013401 | -0.717955 |
| 25               | 6                | 1.137019                | 0.704994  | -0.380395 |
| 26               | 6                | 2.702903                | -1.127329 | 0.038652  |
| 27               | 6                | 2.074246                | -3.442987 | -0.333797 |
| 28               | 1                | 0.053350                | -3.765404 | -1.009531 |
| 29               | 6                | 2.105168                | 1.632922  | -0.023522 |
| 30               | 6                | 3.669107                | -0.154020 | 0.403705  |
| 31               | 6                | 3.014007                | -2.512849 | 0.046398  |
| 32               | 1                | 2.312235                | -4.501483 | -0.339389 |

|    |   |           |           |           |
|----|---|-----------|-----------|-----------|
| 33 | 6 | 3.393092  | 1.195797  | 0.379020  |
| 34 | 1 | 4.657355  | -0.490658 | 0.704098  |
| 35 | 1 | 4.009601  | -2.824848 | 0.349164  |
| 36 | 1 | 4.160396  | 1.906819  | 0.659231  |
| 37 | 6 | -2.060818 | 1.464886  | -2.248453 |
| 38 | 1 | -1.059626 | 1.860532  | -2.056245 |
| 39 | 1 | -1.988084 | 0.798167  | -3.115009 |
| 40 | 1 | -2.702274 | 2.301256  | -2.534467 |
| 41 | 8 | 1.730172  | 2.939904  | -0.085415 |
| 42 | 6 | 2.694784  | 3.958303  | 0.199810  |
| 43 | 1 | 3.544789  | 3.900281  | -0.488671 |
| 44 | 1 | 2.173062  | 4.903733  | 0.053346  |
| 45 | 1 | 3.046354  | 3.892911  | 1.235466  |
| 46 | 1 | -2.906979 | -1.174057 | -0.457357 |
| 47 | 1 | 0.177342  | 1.090662  | -0.693067 |

-----  
mPW1PW91/6-31+G(d,p)//B3LYP/6-31+G(d,p):  
HF = -890.0455198 hartrees (-558512.4641 kcal/mol)

MPWB1K/6-31+G(d,p)//B3LYP/6-31+G(d,p):  
HF = -889.7804554 hartrees (-558346.1335 kcal/mol)

M06-2X/6-31+G(d,p)//B3LYP/6-31+G(d,p):  
HF = -889.8424394 hartrees (-558385.0292 kcal/mol)

bottom  
B3LYP/6-31+G(d,p)//B3LYP/6-31+G(d,p):  
HF = -890.2490992 hartrees (-558640.212238992 kcal/mol)  
Imaginary Frequencies: 1 (-292.5912 1/cm)  
Zero-point correction = 0.404061 (Hartree/Particle)

Coordinates (from last standard orientation):

-----

| Center<br>Number | Atomic<br>Number | Coordinates (Angstroms) |           |           |
|------------------|------------------|-------------------------|-----------|-----------|
|                  |                  | X                       | Y         | Z         |
| 1                | 6                | 3.672716                | 0.419144  | -0.551633 |
| 2                | 6                | 2.385661                | 1.161006  | -0.577130 |
| 3                | 6                | 1.974515                | -0.365228 | -0.337035 |
| 4                | 6                | 2.111804                | -0.772531 | 1.142858  |
| 5                | 6                | 3.331236                | -0.535069 | 1.648995  |
| 6                | 6                | 4.367369                | 0.080058  | 0.735441  |
| 7                | 1                | 4.184911                | 0.279998  | -1.504680 |
| 8                | 1                | 3.586841                | -0.738480 | 2.683285  |
| 9                | 1                | 4.750897                | 1.018269  | 1.165826  |
| 10               | 1                | 5.232855                | -0.571890 | 0.572401  |

|    |   |           |           |           |
|----|---|-----------|-----------|-----------|
| 11 | 6 | 2.082805  | 2.173945  | 0.527661  |
| 12 | 1 | 2.704549  | 3.061831  | 0.377510  |
| 13 | 1 | 1.038473  | 2.488438  | 0.464238  |
| 14 | 1 | 2.262226  | 1.794550  | 1.532601  |
| 15 | 6 | 2.083294  | 1.746951  | -1.961420 |
| 16 | 1 | 1.032700  | 2.027185  | -2.063478 |
| 17 | 1 | 2.674221  | 2.659580  | -2.087489 |
| 18 | 1 | 2.342097  | 1.071770  | -2.782021 |
| 19 | 6 | 0.992512  | -1.050663 | -1.381321 |
| 20 | 1 | 1.516958  | -1.889480 | -1.844925 |
| 21 | 1 | 0.807335  | -0.325097 | -2.174430 |
| 22 | 6 | -0.324140 | -1.586940 | -0.853764 |
| 23 | 6 | -1.381978 | -0.726523 | -0.404607 |
| 24 | 6 | -0.515505 | -2.958989 | -0.848597 |
| 25 | 6 | -1.287827 | 0.683556  | -0.411295 |
| 26 | 6 | -2.601430 | -1.326930 | 0.062991  |
| 27 | 6 | -1.721883 | -3.544564 | -0.400949 |
| 28 | 1 | 0.281009  | -3.610449 | -1.200240 |
| 29 | 6 | -2.328282 | 1.485647  | 0.033461  |
| 30 | 6 | -3.647759 | -0.479127 | 0.511996  |
| 31 | 6 | -2.741494 | -2.739725 | 0.056336  |
| 32 | 1 | -1.835218 | -4.623405 | -0.420778 |
| 33 | 6 | -3.527856 | 0.893776  | 0.507229  |
| 34 | 1 | -4.569689 | -0.932811 | 0.864709  |
| 35 | 1 | -3.671598 | -3.176169 | 0.409621  |
| 36 | 1 | -4.349848 | 1.505982  | 0.856852  |
| 37 | 6 | 0.984345  | -1.344229 | 1.956087  |
| 38 | 1 | 0.112898  | -0.683118 | 1.947568  |
| 39 | 1 | 0.654463  | -2.314250 | 1.577798  |
| 40 | 1 | 1.314849  | -1.471014 | 2.989594  |
| 41 | 8 | -2.110935 | 2.828222  | -0.019741 |
| 42 | 6 | -3.158678 | 3.723919  | 0.366570  |
| 43 | 1 | -3.420830 | 3.595252  | 1.422512  |
| 44 | 1 | -2.757968 | 4.725490  | 0.212303  |
| 45 | 1 | -4.046593 | 3.586601  | -0.259930 |
| 46 | 1 | 2.949851  | -0.908837 | -0.723978 |
| 47 | 1 | -0.404456 | 1.179373  | -0.788189 |

-----  
mPW1PW91/6-31+G(d,p)//B3LYP/6-31+G(d,p):  
HF = -890.0476676 hartrees (-558513.8119 kcal/mol)

MPWB1K/6-31+G(d,p)//B3LYP/6-31+G(d,p):  
HF = -889.7823053 hartrees (-558347.2944 kcal/mol)

M06-2X/6-31+G(d,p)//B3LYP/6-31+G(d,p):  
HF = -889.8442252 hartrees (-558386.1498 kcal/mol)

**Table S4 (vii).** Coordinates and Energies. Path 1: **A1'**→**D1'**

The coordinates below are those for the enantiomer of the structure presented in the Figure S10 (vii).

**A1'**

B3LYP/6-31+G(d,p)//B3LYP/6-31+G(d,p):

HF = -965.5178867 hartrees (-605872.129083117 kcal/mol)

Imaginary Frequencies: none found

Zero-point correction = 0.407447 (Hartree/Particle)

Coordinates (from last standard orientation):

| -----  |        |                         |           |           |
|--------|--------|-------------------------|-----------|-----------|
| Center | Atomic | Coordinates (Angstroms) |           |           |
| Number | Number | X                       | Y         | Z         |
| -----  |        |                         |           |           |
| 1      | 6      | 2.309368                | 1.547586  | -1.242974 |
| 2      | 6      | 1.837770                | 2.766180  | -0.917086 |
| 3      | 6      | 1.997742                | -0.659942 | 0.919383  |
| 4      | 6      | 3.298871                | -1.034415 | 0.513858  |
| 5      | 6      | 4.025616                | -0.216913 | -0.335048 |
| 6      | 6      | 3.717546                | 1.043991  | -1.076119 |
| 7      | 1      | 1.639699                | 0.867694  | -1.770144 |
| 8      | 1      | 5.058851                | -0.530113 | -0.489974 |
| 9      | 1      | 4.374383                | 1.810673  | -0.636016 |
| 10     | 1      | 4.162280                | 0.891253  | -2.075862 |
| 11     | 6      | 2.625715                | 3.843956  | -0.214828 |
| 12     | 1      | 2.723898                | 4.724025  | -0.862366 |
| 13     | 1      | 2.094434                | 4.179233  | 0.684343  |
| 14     | 1      | 3.629474                | 3.538242  | 0.087166  |
| 15     | 6      | 0.421319                | 3.154759  | -1.266234 |
| 16     | 1      | -0.143092               | 3.423707  | -0.364469 |
| 17     | 1      | 0.415695                | 4.039606  | -1.914911 |
| 18     | 1      | -0.111123               | 2.351246  | -1.781947 |
| 19     | 6      | 1.110158                | -1.413480 | 1.827912  |
| 20     | 1      | 0.648454                | -0.792616 | 2.599297  |
| 21     | 1      | 1.582019                | -2.275359 | 2.298754  |
| 22     | 6      | 0.109410                | -1.827796 | 0.752568  |
| 23     | 6      | -1.055285               | -1.024925 | 0.466577  |
| 24     | 6      | 0.343732                | -3.002586 | 0.031937  |
| 25     | 6      | -1.354306               | 0.169830  | 1.145258  |
| 26     | 6      | -1.954277               | -1.507537 | -0.549095 |
| 27     | 6      | -0.549396               | -3.454250 | -0.947186 |
| 28     | 1      | 1.221489                | -3.598747 | 0.261973  |
| 29     | 6      | -2.518295               | 0.881955  | 0.848521  |
| 30     | 6      | -3.133698               | -0.747406 | -0.824430 |
| 31     | 6      | -1.683416               | -2.709229 | -1.236262 |



|    |   |           |           |           |
|----|---|-----------|-----------|-----------|
| 32 | 1 | -0.358213 | -4.386108 | -1.467982 |
| 33 | 6 | -3.415844 | 0.423489  | -0.142006 |
| 34 | 1 | -2.382252 | -3.046370 | -1.993453 |
| 35 | 1 | -4.321497 | 0.973387  | -0.371094 |
| 36 | 6 | 3.959792  | -2.277167 | 1.082170  |
| 37 | 1 | 3.948460  | -2.275910 | 2.176562  |
| 38 | 1 | 3.456718  | -3.189852 | 0.747075  |
| 39 | 1 | 5.001408  | -2.345921 | 0.762363  |
| 40 | 8 | -2.709615 | 2.013721  | 1.560225  |
| 41 | 6 | -3.907636 | 2.778926  | 1.380460  |
| 42 | 1 | -4.793975 | 2.180364  | 1.616021  |
| 43 | 1 | -3.830512 | 3.606585  | 2.084380  |
| 44 | 1 | -3.974758 | 3.171943  | 0.360180  |
| 45 | 1 | -0.708818 | 0.579462  | 1.912221  |
| 46 | 1 | 1.589863  | 0.258342  | 0.507692  |
| 47 | 8 | -3.951746 | -1.246928 | -1.782914 |
| 48 | 1 | -4.741314 | -0.699265 | -1.892547 |

-----

mPW1PW91/6-31+G(d,p)//B3LYP/6-31+G(d,p):

HF = -965.282833 hartrees (-605724.6305 kcal/mol)

MPWB1K/6-31+G(d,p)//B3LYP/6-31+G(d,p):

HF = -964.9979769 hartrees (-605545.8805 kcal/mol)

M06-2X/6-31+G(d,p)//B3LYP/6-31+G(d,p):

HF = -965.0610698 hartrees (-605585.4719 kcal/mol)

**TS** <sub>A1'-E1'</sub>

B3LYP/6-31+G(d,p)//B3LYP/6-31+G(d,p):

HF = -965.5038066 hartrees (-605863.293679566 kcal/mol)

Imaginary Frequencies: 1 (-92.5310 1/cm)

Zero-point correction = 0.407745 (Hartree/Particle)

Coordinates (from last standard orientation):

-----

| Center<br>Number | Atomic<br>Number | Coordinates (Angstroms) |           |           |
|------------------|------------------|-------------------------|-----------|-----------|
|                  |                  | X                       | Y         | Z         |
| 1                | 6                | -1.103616               | -0.716186 | -1.090746 |
| 2                | 1                | -0.965823               | 0.215277  | -1.647418 |
| 3                | 1                | -1.720063               | -1.382288 | -1.697538 |
| 4                | 6                | 0.251189                | -1.346220 | -0.779414 |
| 5                | 6                | 1.365601                | -0.520573 | -0.391519 |
| 6                | 6                | 0.409662                | -2.722753 | -0.880886 |
| 7                | 6                | 1.289032                | 0.886620  | -0.298687 |

S57

|    |   |           |           |           |
|----|---|-----------|-----------|-----------|
| 8  | 6 | 2.611449  | -1.177383 | -0.105991 |
| 9  | 6 | 1.644324  | -3.345114 | -0.618011 |
| 10 | 1 | -0.428667 | -3.333790 | -1.201023 |
| 11 | 6 | 2.400249  | 1.636435  | 0.071483  |
| 12 | 6 | 3.727966  | -0.370815 | 0.275656  |
| 13 | 6 | 2.726469  | -2.581887 | -0.222926 |
| 14 | 1 | 1.741514  | -4.419715 | -0.729705 |
| 15 | 6 | 3.631376  | 1.006225  | 0.367527  |
| 16 | 1 | 3.680644  | -3.048141 | -0.006037 |
| 17 | 1 | 4.499357  | 1.586678  | 0.658567  |
| 18 | 8 | 2.216360  | 2.979344  | 0.127581  |
| 19 | 6 | 3.316104  | 3.832876  | 0.459523  |
| 20 | 1 | 4.127837  | 3.731814  | -0.269134 |
| 21 | 1 | 2.919661  | 4.847013  | 0.421047  |
| 22 | 1 | 3.686857  | 3.625610  | 1.469497  |
| 23 | 1 | 0.381320  | 1.430446  | -0.528114 |
| 24 | 6 | -2.972116 | 1.446863  | 0.682396  |
| 25 | 6 | -3.359547 | 1.565161  | -0.632534 |
| 26 | 6 | -1.716699 | -0.451019 | 0.250533  |
| 27 | 6 | -2.693042 | -1.323473 | 0.915554  |
| 28 | 6 | -3.625606 | -0.746391 | 1.701891  |
| 29 | 6 | -3.785848 | 0.752342  | 1.757888  |
| 30 | 1 | -2.144657 | 2.070706  | 1.011311  |
| 31 | 1 | -4.328573 | -1.359143 | 2.260635  |
| 32 | 1 | -4.850432 | 1.002490  | 1.665976  |
| 33 | 1 | -3.484091 | 1.120856  | 2.747936  |
| 34 | 6 | -4.594710 | 0.900201  | -1.162944 |
| 35 | 1 | -5.454067 | 1.570284  | -1.014140 |
| 36 | 1 | -4.521561 | 0.710403  | -2.237201 |
| 37 | 1 | -4.825773 | -0.034985 | -0.645882 |
| 38 | 6 | -2.600320 | 2.436903  | -1.585868 |
| 39 | 1 | -2.306546 | 1.885136  | -2.487556 |
| 40 | 1 | -3.259985 | 3.243475  | -1.934507 |
| 41 | 1 | -1.716491 | 2.894017  | -1.135264 |
| 42 | 6 | -2.653142 | -2.821844 | 0.690970  |
| 43 | 1 | -2.787755 | -3.073337 | -0.366426 |
| 44 | 1 | -1.700589 | -3.249832 | 1.015631  |
| 45 | 1 | -3.457862 | -3.301736 | 1.251505  |
| 46 | 1 | -1.073318 | 0.132023  | 0.903191  |
| 47 | 8 | 4.881330  | -1.038792 | 0.535854  |
| 48 | 1 | 5.594903  | -0.427480 | 0.763807  |

-----  
mPW1PW91/6-31+G(d,p)//B3LYP/6-31+G(d,p):  
HF = -965.2721068 hartrees (-605717.8997 kcal/mol)

MPWB1K/6-31+G(d,p)//B3LYP/6-31+G(d,p):  
HF = -964.9899526 hartrees (-605540.8451 kcal/mol)

M06-2X/6-31+G(d,p)//B3LYP/6-31+G(d,p):  
HF = -965.0560879 hartrees (-605582.3457 kcal/mol)

**E1'**

B3LYP/6-31+G(d,p)//B3LYP/6-31+G(d,p):  
HF = -965.5136882 hartrees (-605869.494482382 kcal/mol)

Imaginary Frequencies: none found

Zero-point correction = 0.408276 (Hartree/Particle)

Coordinates (from last standard orientation):

```
-----  
Center   Atomic      Coordinates (Angstroms)  
Number   Number      X         Y         Z  
-----  
  1      6      -2.659281  1.008858  0.309319  
  2      6      -3.523240  1.226966 -0.841293  
  3      6      -1.758956 -0.257498  0.460565  
  4      6      -2.624543 -1.256417  1.221512  
  5      6      -3.739995 -0.679572  1.697368  
  6      6      -3.855339  0.781946  1.390880  
  7      1      -2.118616  1.924545  0.554362  
  8      1      -4.498295 -1.184616  2.288193  
  9      1      -4.859068  1.074452  1.048482  
 10      1      -3.621067  1.449648  2.228796  
 11      6      -4.180867  0.117313 -1.568675  
 12      1      -5.143261  0.412353 -1.993560  
 13      1      -3.527476 -0.154224 -2.412484  
 14      1      -4.275623 -0.781133 -0.952289  
 15      6      -3.811830  2.616084 -1.271289  
 16      1      -4.848115  2.752135 -1.593203  
 17      1      -3.530109  3.364725 -0.528301  
 18      1      -3.188032  2.798314 -2.164659  
 19      6      -1.105233 -0.737585 -0.877341  
 20      1      -1.056815  0.123598 -1.559692  
 21      1      -1.749067 -1.479604 -1.359638  
 22      6      0.278708 -1.323201 -0.719420  
 23      6      1.395330 -0.481153 -0.380426  
 24      6      0.487674 -2.678688 -0.917773  
 25      6      1.279277  0.921520 -0.229451  
 26      6      2.679731 -1.099405 -0.207156  
 27      6      1.757885 -3.272209 -0.759703  
 28      1      -0.350793 -3.307889 -1.205836  
 29      6      2.383725  1.697243  0.098339
```

|    |   |           |           |           |
|----|---|-----------|-----------|-----------|
| 30 | 6 | 3.788072  | -0.267180 | 0.137708  |
| 31 | 6 | 2.837414  | -2.493844 | -0.396732 |
| 32 | 1 | 1.879744  | -4.337931 | -0.923017 |
| 33 | 6 | 3.651444  | 1.101358  | 0.292663  |
| 34 | 1 | 3.818987  | -2.933592 | -0.263673 |
| 35 | 1 | 4.516580  | 1.700551  | 0.553031  |
| 36 | 6 | -2.196477 | -2.669046 | 1.471333  |
| 37 | 1 | -2.078332 | -3.228293 | 0.537102  |
| 38 | 1 | -1.221978 | -2.695348 | 1.972539  |
| 39 | 1 | -2.922178 | -3.195199 | 2.095844  |
| 40 | 8 | 2.160366  | 3.034499  | 0.214618  |
| 41 | 6 | 3.252044  | 3.906790  | 0.514941  |
| 42 | 1 | 4.023374  | 3.858301  | -0.261918 |
| 43 | 1 | 2.827157  | 4.910082  | 0.539585  |
| 44 | 1 | 3.688812  | 3.673945  | 1.492775  |
| 45 | 1 | -0.933535 | 0.033287  | 1.123360  |
| 46 | 1 | 0.342278  | 1.438629  | -0.392596 |
| 47 | 8 | 4.980981  | -0.899747 | 0.299398  |
| 48 | 1 | 5.681397  | -0.268437 | 0.512455  |

-----  
mPW1PW91/6-31+G(d,p)//B3LYP/6-31+G(d,p):  
HF = -965.2885428 hartrees (-605728.2135 kcal/mol)

MPWB1K/6-31+G(d,p)//B3LYP/6-31+G(d,p):  
HF = -965.0102633 hartrees (-605553.5904 kcal/mol)

M06-2X/6-31+G(d,p)//B3LYP/6-31+G(d,p):  
HF = -965.0733364 hartrees (-605593.1693 kcal/mol)

**TS** <sub>E1'-C1'</sub>  
B3LYP/6-31+G(d,p)//B3LYP/6-31+G(d,p):  
HF = -965.4875098 hartrees (-605853.067274598 kcal/mol)  
Imaginary Frequencies: 1 (-291.4929 1/cm)  
Zero-point correction = 0.407983 (Hartree/Particle)

Coordinates (from last standard orientation):

-----  

| Center<br>Number | Atomic<br>Number | Coordinates (Angstroms) |           |           |
|------------------|------------------|-------------------------|-----------|-----------|
|                  |                  | X                       | Y         | Z         |
| 1                | 6                | -2.266108               | 1.566068  | 0.447372  |
| 2                | 6                | -3.122301               | 0.932633  | -0.589357 |
| 3                | 6                | -2.038340               | -0.151138 | -0.179364 |
| 4                | 6                | -2.436948               | -0.922288 | 1.079254  |
| 5                | 6                | -2.669379               | -0.133185 | 2.136353  |

S60

|    |   |           |           |           |
|----|---|-----------|-----------|-----------|
| 6  | 6 | -2.512302 | 1.356198  | 1.919717  |
| 7  | 1 | -1.573430 | 2.342420  | 0.122291  |
| 8  | 1 | -2.989116 | -0.507755 | 3.102766  |
| 9  | 1 | -3.439238 | 1.886650  | 2.185334  |
| 10 | 1 | -1.710368 | 1.792041  | 2.526006  |
| 11 | 6 | -4.589984 | 0.626819  | -0.294302 |
| 12 | 1 | -5.167032 | 1.555034  | -0.342514 |
| 13 | 1 | -4.984686 | -0.042558 | -1.064154 |
| 14 | 1 | -4.760267 | 0.166416  | 0.677498  |
| 15 | 6 | -2.964918 | 1.551477  | -1.982266 |
| 16 | 1 | -3.272170 | 0.847381  | -2.760302 |
| 17 | 1 | -3.615303 | 2.428383  | -2.056528 |
| 18 | 1 | -1.944930 | 1.880264  | -2.198105 |
| 19 | 6 | -1.229063 | -0.828021 | -1.326136 |
| 20 | 1 | -1.093504 | -0.109012 | -2.136182 |
| 21 | 1 | -1.895165 | -1.606294 | -1.715886 |
| 22 | 6 | 0.096484  | -1.434695 | -0.917497 |
| 23 | 6 | 1.187390  | -0.591731 | -0.519683 |
| 24 | 6 | 0.265504  | -2.807926 | -0.933569 |
| 25 | 6 | 1.124494  | 0.824625  | -0.578929 |
| 26 | 6 | 2.389197  | -1.219765 | -0.053302 |
| 27 | 6 | 1.471438  | -3.415035 | -0.516914 |
| 28 | 1 | -0.550509 | -3.442234 | -1.271393 |
| 29 | 6 | 2.191158  | 1.603430  | -0.149866 |
| 30 | 6 | 3.459989  | -0.381811 | 0.385843  |
| 31 | 6 | 2.509015  | -2.632185 | -0.059678 |
| 32 | 1 | 1.568877  | -4.495110 | -0.546399 |
| 33 | 6 | 3.365726  | 0.999110  | 0.355740  |
| 34 | 1 | 3.431935  | -3.081434 | 0.288076  |
| 35 | 1 | 4.198556  | 1.600995  | 0.701189  |
| 36 | 6 | -2.604464 | -2.413843 | 1.056768  |
| 37 | 1 | -3.300042 | -2.722706 | 0.266875  |
| 38 | 1 | -1.655302 | -2.924910 | 0.878168  |
| 39 | 1 | -3.005011 | -2.759280 | 2.012193  |
| 40 | 8 | 2.026353  | 2.949523  | -0.255705 |
| 41 | 6 | 3.116643  | 3.821808  | 0.059053  |
| 42 | 1 | 3.986547  | 3.609296  | -0.571731 |
| 43 | 1 | 2.755208  | 4.828278  | -0.150230 |
| 44 | 1 | 3.391110  | 3.747485  | 1.117276  |
| 45 | 1 | -1.179443 | 0.550194  | 0.275909  |
| 46 | 1 | 0.305578  | 1.340422  | -1.066167 |
| 47 | 8 | 4.570538  | -1.023633 | 0.832585  |
| 48 | 1 | 5.263195  | -0.394364 | 1.075535  |

-----  
mPW1PW91/6-31+G(d,p)//B3LYP/6-31+G(d,p):

S61

HF = -965.2696886 hartrees (-605716.3823 kcal/mol)

MPWB1K/6-31+G(d,p)//B3LYP/6-31+G(d,p):

HF = -964.9952194 hartrees (-605544.1501 kcal/mol)

M06-2X/6-31+G(d,p)//B3LYP/6-31+G(d,p):

HF = -965.0592992 hartrees (-605584.3608 kcal/mol)

### C1'

B3LYP/6-31+G(d,p)//B3LYP/6-31+G(d,p):

HF = -965.537271 hartrees (-605884.29292521 kcal/mol)

Imaginary Frequencies: none found

Zero-point correction = 0.410170 (Hartree/Particle)

Coordinates (from last standard orientation):

| -----  |        |                         |           |           |  |
|--------|--------|-------------------------|-----------|-----------|--|
| Center | Atomic | Coordinates (Angstroms) |           |           |  |
| Number | Number | X                       | Y         | Z         |  |
| -----  |        |                         |           |           |  |
| 1      | 6      | -3.287525               | 1.518264  | 0.018474  |  |
| 2      | 6      | -2.959846               | 0.274610  | -0.840042 |  |
| 3      | 6      | -1.973601               | -0.630608 | -0.114915 |  |
| 4      | 6      | -2.017752               | -0.756033 | 1.307736  |  |
| 5      | 6      | -2.853861               | 0.079822  | 2.018690  |  |
| 6      | 6      | -3.665030               | 1.179591  | 1.457855  |  |
| 7      | 1      | -4.094577               | 2.076775  | -0.464831 |  |
| 8      | 1      | -2.947490               | -0.097463 | 3.089755  |  |
| 9      | 1      | -4.721355               | 0.869396  | 1.549185  |  |
| 10     | 1      | -3.589830               | 2.054628  | 2.117178  |  |
| 11     | 6      | -4.237376               | -0.611143 | -1.053960 |  |
| 12     | 1      | -4.978673               | -0.011898 | -1.591767 |  |
| 13     | 1      | -4.013002               | -1.489926 | -1.664840 |  |
| 14     | 1      | -4.679049               | -0.950759 | -0.113846 |  |
| 15     | 6      | -2.493452               | 0.764990  | -2.230374 |  |
| 16     | 1      | -2.435757               | -0.039405 | -2.966996 |  |
| 17     | 1      | -3.227889               | 1.484195  | -2.604247 |  |
| 18     | 1      | -1.525731               | 1.272261  | -2.190153 |  |
| 19     | 6      | -1.095483               | -1.536126 | -0.920052 |  |
| 20     | 1      | -1.157742               | -1.269887 | -1.976123 |  |
| 21     | 1      | -1.568351               | -2.529771 | -0.833482 |  |
| 22     | 6      | 0.372261                | -1.716335 | -0.528067 |  |
| 23     | 6      | 1.240934                | -0.595519 | -0.298448 |  |
| 24     | 6      | 0.886844                | -3.002130 | -0.511396 |  |
| 25     | 6      | 0.798594                | 0.746293  | -0.292998 |  |
| 26     | 6      | 2.634180                | -0.869259 | -0.068256 |  |
| 27     | 6      | 2.254902                | -3.253981 | -0.279667 |  |

S62

|    |   |           |           |           |
|----|---|-----------|-----------|-----------|
| 28 | 1 | 0.225463  | -3.845367 | -0.695879 |
| 29 | 6 | 1.682832  | 1.795449  | -0.094228 |
| 30 | 6 | 3.513300  | 0.237783  | 0.143278  |
| 31 | 6 | 3.116485  | -2.199889 | -0.059271 |
| 32 | 1 | 2.622533  | -4.274590 | -0.284979 |
| 33 | 6 | 3.057655  | 1.543142  | 0.128869  |
| 34 | 1 | 4.171383  | -2.373096 | 0.118423  |
| 35 | 1 | 3.755086  | 2.357635  | 0.288384  |
| 36 | 6 | -1.247169 | -1.823368 | 2.057869  |
| 37 | 1 | -1.372621 | -2.810607 | 1.605218  |
| 38 | 1 | -0.176117 | -1.609368 | 2.078374  |
| 39 | 1 | -1.602173 | -1.882489 | 3.089297  |
| 40 | 8 | 1.144149  | 3.044201  | -0.119695 |
| 41 | 6 | 1.995809  | 4.182432  | 0.039415  |
| 42 | 1 | 2.750272  | 4.225475  | -0.753818 |
| 43 | 1 | 1.341331  | 5.050296  | -0.037594 |
| 44 | 1 | 2.481639  | 4.179974  | 1.021620  |
| 45 | 1 | -0.243044 | 1.001132  | -0.442516 |
| 46 | 1 | -2.410432 | 2.176788  | 0.025519  |
| 47 | 8 | 4.819142  | -0.075823 | 0.355025  |
| 48 | 1 | 5.353600  | 0.721125  | 0.472409  |

-----  
 mPW1PW91/6-31+G(d,p)//B3LYP/6-31+G(d,p):

HF = -965.31237 hartrees (-605743.1653 kcal/mol)

MPWB1K/6-31+G(d,p)//B3LYP/6-31+G(d,p):

HF = -965.0344476 hartrees (-605568.7662 kcal/mol)

M06-2X/6-31+G(d,p)//B3LYP/6-31+G(d,p):

HF = -965.100491 hartrees (-605610.2091 kcal/mol)

**TS<sub>c1'-D1'</sub>**

B3LYP/6-31+G(d,p)//B3LYP/6-31+G(d,p):

HF = -965.5303683 hartrees (-605879.961411933 kcal/mol)

Imaginary Frequencies: 1 (-181.6546 1/cm)

Zero-point correction = 0.411518 (Hartree/Particle)

Coordinates (from last standard orientation):

-----  

| Center<br>Number | Atomic<br>Number | Coordinates (Angstroms) |           |           |
|------------------|------------------|-------------------------|-----------|-----------|
|                  |                  | X                       | Y         | Z         |
| 1                | 6                | -3.207132               | 0.932632  | 0.026570  |
| 2                | 6                | -2.669890               | -0.313065 | -0.710905 |
| 3                | 6                | -1.380289               | -0.820172 | -0.034228 |

S63

|    |   |           |           |           |
|----|---|-----------|-----------|-----------|
| 4  | 6 | -1.320269 | -0.751675 | 1.426995  |
| 5  | 6 | -2.281196 | -0.074293 | 2.117997  |
| 6  | 6 | -3.404902 | 0.698846  | 1.522150  |
| 7  | 1 | -4.148969 | 1.241333  | -0.438918 |
| 8  | 1 | -2.251660 | -0.129271 | 3.205078  |
| 9  | 1 | -4.339971 | 0.153421  | 1.727796  |
| 10 | 1 | -3.517363 | 1.650302  | 2.057920  |
| 11 | 6 | -3.688625 | -1.496328 | -0.602994 |
| 12 | 1 | -4.662016 | -1.154223 | -0.967400 |
| 13 | 1 | -3.383220 | -2.342872 | -1.223960 |
| 14 | 1 | -3.812893 | -1.853071 | 0.422232  |
| 15 | 6 | -2.550224 | 0.048123  | -2.208264 |
| 16 | 1 | -2.088283 | -0.733870 | -2.816714 |
| 17 | 1 | -3.555898 | 0.205023  | -2.609136 |
| 18 | 1 | -2.003247 | 0.983415  | -2.362944 |
| 19 | 6 | -0.664103 | -1.989705 | -0.729664 |
| 20 | 1 | -0.978058 | -2.034285 | -1.776200 |
| 21 | 1 | -1.006027 | -2.923559 | -0.264862 |
| 22 | 6 | 0.843775  | -1.880808 | -0.631768 |
| 23 | 6 | 1.315594  | -0.556844 | -0.539262 |
| 24 | 6 | 1.733223  | -2.934774 | -0.516830 |
| 25 | 6 | 0.358484  | 0.504630  | -0.708885 |
| 26 | 6 | 2.656415  | -0.310353 | -0.159875 |
| 27 | 6 | 3.099636  | -2.687411 | -0.249326 |
| 28 | 1 | 1.380979  | -3.960717 | -0.583538 |
| 29 | 6 | 0.744521  | 1.815069  | -0.325531 |
| 30 | 6 | 2.994738  | 1.044138  | 0.169654  |
| 31 | 6 | 3.555117  | -1.398397 | -0.035618 |
| 32 | 1 | 3.784079  | -3.524103 | -0.156425 |
| 33 | 6 | 2.048703  | 2.070133  | 0.138027  |
| 34 | 1 | 4.584858  | -1.213165 | 0.247340  |
| 35 | 1 | 2.350086  | 3.072524  | 0.420319  |
| 36 | 6 | -0.247093 | -1.482805 | 2.206657  |
| 37 | 1 | -0.176333 | -2.539153 | 1.930004  |
| 38 | 1 | 0.742601  | -1.044835 | 2.047304  |
| 39 | 1 | -0.463613 | -1.433500 | 3.276090  |
| 40 | 8 | -0.177354 | 2.773710  | -0.509356 |
| 41 | 6 | 0.159491  | 4.155617  | -0.293496 |
| 42 | 1 | 0.982929  | 4.458643  | -0.947389 |
| 43 | 1 | -0.738838 | 4.714832  | -0.550388 |
| 44 | 1 | 0.415972  | 4.332948  | 0.755473  |
| 45 | 1 | -0.314522 | 0.465461  | -1.555530 |
| 46 | 1 | -2.495227 | 1.752541  | -0.119944 |
| 47 | 8 | 4.263803  | 1.255910  | 0.551798  |
| 48 | 1 | 4.427222  | 2.183868  | 0.775833  |



mPW1PW91/6-31+G(d,p)//B3LYP/6-31+G(d,p):  
HF = -965.3089566 hartrees (-605741.0234 kcal/mol)

MPWB1K/6-31+G(d,p)//B3LYP/6-31+G(d,p):  
HF = -965.0305983 hartrees (-605566.3508 kcal/mol)

M06-2X/6-31+G(d,p)//B3LYP/6-31+G(d,p):  
HF = -965.0969171 hartrees (-605607.9664 kcal/mol)

### D1'

B3LYP/6-31+G(d,p)//B3LYP/6-31+G(d,p):  
HF = -965.5502643 hartrees (-605892.446350893 kcal/mol)  
Imaginary Frequencies: none found  
Zero-point correction = 0.414062 (Hartree/Particle)

Coordinates (from last standard orientation):

-----

| Center<br>Number | Atomic<br>Number | Coordinates (Angstroms) |           |           |
|------------------|------------------|-------------------------|-----------|-----------|
|                  |                  | X                       | Y         | Z         |
| 1                | 6                | -3.256725               | 0.522079  | -0.473509 |
| 2                | 6                | -2.390444               | -0.699225 | -0.855381 |
| 3                | 6                | -1.041099               | -0.726764 | -0.016618 |
| 4                | 6                | -1.284250               | -0.377341 | 1.459951  |
| 5                | 6                | -2.428108               | 0.192030  | 1.877969  |
| 6                | 6                | -3.600088               | 0.559474  | 1.017116  |
| 7                | 1                | -4.175946               | 0.495855  | -1.070065 |
| 8                | 1                | -2.535649               | 0.390268  | 2.943894  |
| 9                | 1                | -4.433522               | -0.121549 | 1.243318  |
| 10               | 1                | -3.964706               | 1.555502  | 1.299450  |
| 11               | 6                | -3.211771               | -1.981489 | -0.547209 |
| 12               | 1                | -4.219848               | -1.871996 | -0.959171 |
| 13               | 1                | -2.778550               | -2.874800 | -1.004546 |
| 14               | 1                | -3.308470               | -2.166435 | 0.525862  |
| 15               | 6                | -2.146508               | -0.650992 | -2.378069 |
| 16               | 1                | -1.461497               | -1.429874 | -2.731486 |
| 17               | 1                | -3.094900               | -0.802937 | -2.902890 |
| 18               | 1                | -1.763416               | 0.321865  | -2.709683 |
| 19               | 6                | -0.367422               | -2.156826 | -0.164569 |
| 20               | 1                | -0.659132               | -2.608215 | -1.117439 |
| 21               | 1                | -0.703945               | -2.840090 | 0.619388  |
| 22               | 6                | 1.121984                | -1.937090 | -0.149098 |
| 23               | 6                | 1.394105                | -0.589959 | -0.336844 |
| 24               | 6                | 2.184376                | -2.817011 | 0.055372  |
| 25               | 6                | 0.153504                | 0.203674  | -0.589304 |

S65

|    |   |           |           |           |
|----|---|-----------|-----------|-----------|
| 26 | 6 | 2.692290  | -0.072351 | -0.232292 |
| 27 | 6 | 3.504953  | -2.324518 | 0.088457  |
| 28 | 1 | 2.004884  | -3.877049 | 0.211909  |
| 29 | 6 | 0.361971  | 1.655667  | -0.281282 |
| 30 | 6 | 2.789782  | 1.359094  | -0.186275 |
| 31 | 6 | 3.770111  | -0.964979 | -0.031647 |
| 32 | 1 | 4.326070  | -3.015693 | 0.247520  |
| 33 | 6 | 1.648702  | 2.183221  | -0.163435 |
| 34 | 1 | 4.782477  | -0.587118 | 0.054845  |
| 35 | 1 | 1.790136  | 3.252300  | -0.052286 |
| 36 | 6 | -0.188582 | -0.663204 | 2.466989  |
| 37 | 1 | 0.092738  | -1.721515 | 2.498683  |
| 38 | 1 | 0.733172  | -0.105700 | 2.254810  |
| 39 | 1 | -0.515022 | -0.379820 | 3.470488  |
| 40 | 8 | -0.721345 | 2.395632  | -0.263521 |
| 41 | 6 | -0.661536 | 3.832848  | -0.097598 |
| 42 | 1 | -0.109050 | 4.284704  | -0.925481 |
| 43 | 1 | -1.698851 | 4.160767  | -0.116661 |
| 44 | 1 | -0.206695 | 4.079894  | 0.864665  |
| 45 | 1 | 0.007759  | 0.220877  | -1.684836 |
| 46 | 1 | -2.732678 | 1.439171  | -0.751201 |
| 47 | 8 | 4.013102  | 1.865586  | -0.104551 |
| 48 | 1 | 4.019108  | 2.833814  | -0.040860 |

-----  
mPW1PW91/6-31+G(d,p)//B3LYP/6-31+G(d,p):

HF = -965.3353572 hartrees (-605757.59 kcal/mol)

MPWB1K/6-31+G(d,p)//B3LYP/6-31+G(d,p):

HF = -965.0634789 hartrees (-605586.9836 kcal/mol)

M06-2X/6-31+G(d,p)//B3LYP/6-31+G(d,p):

HF = -965.1286412 hartrees (-605627.8736 kcal/mol)

**Table S4 (viii).** Coordinates and Energies. Path 2: **A2'→D2'**  
*The coordinates below are those for the enantiomer of the structure presented in Figure S10 (viii).*

**A2'**

B3LYP/6-31+G(d,p)//B3LYP/6-31+G(d,p):

HF = -965.514531 hartrees (-605870.02334781 kcal/mol)

Imaginary Frequencies: none found

Zero-point correction = 0.407772 (Hartree/Particle)

Coordinates (from last standard orientation):

| -----  |        |                         |           |           |
|--------|--------|-------------------------|-----------|-----------|
| Center | Atomic | Coordinates (Angstroms) |           |           |
| Number | Number | X                       | Y         | Z         |
| -----  |        |                         |           |           |
| 1      | 6      | 3.902485                | 0.026465  | -0.913698 |
| 2      | 6      | 4.957042                | 0.487544  | -0.213452 |
| 3      | 6      | 1.493660                | -0.978910 | 0.766215  |
| 4      | 6      | 1.403034                | -1.984406 | -0.220425 |
| 5      | 6      | 2.441461                | -2.144245 | -1.124379 |
| 6      | 6      | 3.688818                | -1.374562 | -1.421055 |
| 7      | 1      | 3.157015                | 0.749765  | -1.244863 |
| 8      | 1      | 2.363661                | -3.035921 | -1.747660 |
| 9      | 1      | 4.520071                | -2.040695 | -1.141910 |
| 10     | 1      | 3.748485                | -1.363737 | -2.524016 |
| 11     | 6      | 6.098590                | -0.356539 | 0.296505  |
| 12     | 1      | 7.041735                | -0.031813 | -0.159992 |
| 13     | 1      | 6.217901                | -0.222832 | 1.378684  |
| 14     | 1      | 5.985428                | -1.425365 | 0.103943  |
| 15     | 6      | 5.078733                | 1.958964  | 0.103580  |
| 16     | 1      | 5.155091                | 2.124123  | 1.185809  |
| 17     | 1      | 5.995385                | 2.370931  | -0.336331 |
| 18     | 1      | 4.232798                | 2.535974  | -0.279833 |
| 19     | 6      | 0.536809                | -0.682461 | 1.858150  |
| 20     | 1      | 1.038230                | -0.361681 | 2.773906  |
| 21     | 1      | -0.152142               | -1.491847 | 2.088413  |
| 22     | 6      | -0.134491               | 0.496558  | 1.147089  |
| 23     | 6      | -1.461814               | 0.408591  | 0.581126  |
| 24     | 6      | 0.586649                | 1.692310  | 1.044693  |
| 25     | 6      | -2.297180               | -0.713494 | 0.722256  |
| 26     | 6      | -1.960546               | 1.571827  | -0.108605 |
| 27     | 6      | 0.068898                | 2.816409  | 0.390441  |
| 28     | 1      | 1.568338                | 1.756945  | 1.506369  |
| 29     | 6      | -3.582681               | -0.720787 | 0.180206  |
| 30     | 6      | -3.277877               | 1.519076  | -0.663044 |
| 31     | 6      | -1.184755               | 2.746640  | -0.197431 |

|    |   |           |           |           |
|----|---|-----------|-----------|-----------|
| 32 | 1 | 0.644697  | 3.734495  | 0.348574  |
| 33 | 6 | -4.076883 | 0.397530  | -0.527855 |
| 34 | 1 | -1.595010 | 3.603794  | -0.719153 |
| 35 | 1 | -5.073617 | 0.391986  | -0.953901 |
| 36 | 6 | 0.252341  | -2.971143 | -0.239264 |
| 37 | 1 | 0.073107  | -3.402543 | 0.750492  |
| 38 | 1 | -0.672796 | -2.488916 | -0.565638 |
| 39 | 1 | 0.456995  | -3.794889 | -0.926390 |
| 40 | 8 | -4.292893 | -1.852395 | 0.379062  |
| 41 | 6 | -5.640471 | -1.945820 | -0.097970 |
| 42 | 1 | -5.678058 | -1.865659 | -1.189869 |
| 43 | 1 | -5.986977 | -2.932849 | 0.205562  |
| 44 | 1 | -6.273433 | -1.179149 | 0.361520  |
| 45 | 1 | -1.989767 | -1.597685 | 1.263919  |
| 46 | 1 | 2.368697  | -0.338307 | 0.722331  |
| 47 | 8 | -3.693532 | 2.635541  | -1.311353 |
| 48 | 1 | -4.605362 | 2.543428  | -1.620143 |

-----  
mPW1PW91/6-31+G(d,p)//B3LYP/6-31+G(d,p):  
HF = -965.2794796 hartrees (-605722.5262 kcal/mol)

MPWB1K/6-31+G(d,p)//B3LYP/6-31+G(d,p):  
HF = -964.9940559 hartrees (-605543.42 kcal/mol)

M06-2X/6-31+G(d,p)//B3LYP/6-31+G(d,p):  
HF = -965.0576046 hartrees (-605583.2975 kcal/mol)

**TS** <sub>A2'-E2'</sub>  
B3LYP/6-31+G(d,p)//B3LYP/6-31+G(d,p):  
HF = -965.4980468 hartrees (-605859.679347468 kcal/mol)  
Imaginary Frequencies: 1 (-152.8606 1/cm)  
Zero-point correction = 0.406641 (Hartree/Particle)

Coordinates (from last standard orientation):

-----  

| Center<br>Number | Atomic<br>Number | Coordinates (Angstroms) |           |           |
|------------------|------------------|-------------------------|-----------|-----------|
|                  |                  | X                       | Y         | Z         |
| 1                | 6                | -3.013748               | -0.056841 | -1.494787 |
| 2                | 6                | -3.692394               | -0.984134 | -0.740010 |
| 3                | 6                | -1.573434               | 0.648102  | 0.255170  |
| 4                | 6                | -2.373455               | 1.836708  | 0.496992  |
| 5                | 6                | -3.207145               | 2.245191  | -0.490407 |
| 6                | 6                | -3.481236               | 1.375468  | -1.692474 |
| 7                | 1                | -2.222220               | -0.421673 | -2.143786 |

S68

|    |   |           |           |           |
|----|---|-----------|-----------|-----------|
| 8  | 1 | -3.750976 | 3.182797  | -0.401001 |
| 9  | 1 | -4.555248 | 1.412943  | -1.915738 |
| 10 | 1 | -2.989210 | 1.813063  | -2.573414 |
| 11 | 6 | -4.916865 | -0.609016 | 0.039850  |
| 12 | 1 | -4.801026 | 0.357178  | 0.546313  |
| 13 | 1 | -5.770547 | -0.494779 | -0.643725 |
| 14 | 1 | -5.184392 | -1.369992 | 0.776070  |
| 15 | 6 | -3.275118 | -2.420839 | -0.713520 |
| 16 | 1 | -3.155261 | -2.777828 | 0.316466  |
| 17 | 1 | -4.076330 | -3.033108 | -1.150258 |
| 18 | 1 | -2.353048 | -2.607361 | -1.266833 |
| 19 | 6 | -1.039968 | -0.227419 | 1.346079  |
| 20 | 1 | -1.856506 | -0.804668 | 1.801355  |
| 21 | 1 | -0.724233 | 0.452949  | 2.156388  |
| 22 | 6 | 0.099222  | -1.131680 | 0.928720  |
| 23 | 6 | 1.328557  | -0.547405 | 0.472835  |
| 24 | 6 | -0.026165 | -2.505716 | 0.999901  |
| 25 | 6 | 1.546056  | 0.854423  | 0.443014  |
| 26 | 6 | 2.370643  | -1.432696 | 0.041242  |
| 27 | 6 | 1.019492  | -3.368423 | 0.597058  |
| 28 | 1 | -0.946894 | -2.939619 | 1.380977  |
| 29 | 6 | 2.744655  | 1.374821  | -0.029312 |
| 30 | 6 | 3.586066  | -0.855411 | -0.437317 |
| 31 | 6 | 2.194383  | -2.838098 | 0.111668  |
| 32 | 1 | 0.889887  | -4.443150 | 0.669581  |
| 33 | 6 | 3.773310  | 0.515309  | -0.482199 |
| 34 | 1 | 3.002411  | -3.483647 | -0.212330 |
| 35 | 1 | 4.710518  | 0.915528  | -0.852034 |
| 36 | 6 | -2.285349 | 2.549531  | 1.832715  |
| 37 | 1 | -2.674990 | 1.922749  | 2.642514  |
| 38 | 1 | -1.253345 | 2.813975  | 2.085013  |
| 39 | 1 | -2.874489 | 3.468500  | 1.809471  |
| 40 | 8 | 2.853736  | 2.728368  | -0.015654 |
| 41 | 6 | 4.078776  | 3.343996  | -0.421681 |
| 42 | 1 | 4.300254  | 3.131157  | -1.473670 |
| 43 | 1 | 3.922616  | 4.415014  | -0.295558 |
| 44 | 1 | 4.912529  | 3.021062  | 0.211625  |
| 45 | 1 | 0.823417  | 1.561342  | 0.832246  |
| 46 | 1 | -1.007915 | 0.616622  | -0.669058 |
| 47 | 8 | 4.541036  | -1.732778 | -0.844336 |
| 48 | 1 | 5.339123  | -1.268984 | -1.131900 |

-----  
mPW1PW91/6-31+G(d,p)//B3LYP/6-31+G(d,p):  
HF = -965.2659253 hartrees (-605714.0208 kcal/mol)

MPWB1K/6-31+G(d,p)//B3LYP/6-31+G(d,p):  
HF = -964.9836682 hartrees (-605536.9016 kcal/mol)

M06-2X/6-31+G(d,p)//B3LYP/6-31+G(d,p):  
HF = -965.049725 hartrees (-605578.3529 kcal/mol)

### E2'

B3LYP/6-31+G(d,p)//B3LYP/6-31+G(d,p):  
HF = -965.5259195 hartrees (-605877.169745445 kcal/mol)

Imaginary Frequencies: none found

Zero-point correction = 0.410267 (Hartree/Particle)

Coordinates (from last standard orientation):

-----

| Center<br>Number | Atomic<br>Number | Coordinates (Angstroms) |           |           |
|------------------|------------------|-------------------------|-----------|-----------|
|                  |                  | X                       | Y         | Z         |
| 1                | 6                | 1.768190                | 0.477096  | 1.041707  |
| 2                | 6                | 1.595954                | -1.008773 | 1.091231  |
| 3                | 6                | 2.052266                | 1.055789  | -0.383384 |
| 4                | 6                | 3.561047                | 1.268993  | -0.417453 |
| 5                | 6                | 4.080507                | 1.173072  | 0.814401  |
| 6                | 6                | 3.043267                | 0.899878  | 1.874143  |
| 7                | 1                | 0.871354                | 0.932350  | 1.464915  |
| 8                | 1                | 5.124663                | 1.341217  | 1.061278  |
| 9                | 1                | 3.348960                | 0.155802  | 2.618042  |
| 10               | 1                | 2.796892                | 1.808759  | 2.439001  |
| 11               | 6                | 2.733590                | -1.912047 | 0.724351  |
| 12               | 1                | 3.456553                | -1.862549 | 1.553472  |
| 13               | 1                | 2.419628                | -2.953558 | 0.638607  |
| 14               | 1                | 3.273478                | -1.598110 | -0.167684 |
| 15               | 6                | 0.588513                | -1.580352 | 2.023265  |
| 16               | 1                | 0.138902                | -2.494826 | 1.616180  |
| 17               | 1                | 1.111272                | -1.893196 | 2.941449  |
| 18               | 1                | -0.193811               | -0.871008 | 2.293441  |
| 19               | 6                | 1.445327                | 0.168685  | -1.513452 |
| 20               | 1                | 2.234254                | -0.432219 | -1.974763 |
| 21               | 1                | 1.055111                | 0.810857  | -2.311553 |
| 22               | 6                | 0.355997                | -0.771970 | -1.040891 |
| 23               | 6                | -0.942202               | -0.271448 | -0.613888 |
| 24               | 6                | 0.485357                | -2.151864 | -1.286622 |
| 25               | 6                | -1.227506               | 1.096474  | -0.508348 |
| 26               | 6                | -1.975340               | -1.230170 | -0.320109 |
| 27               | 6                | -0.531521               | -3.068424 | -1.002956 |
| 28               | 1                | 1.418904                | -2.515892 | -1.705122 |
| 29               | 6                | -2.492808               | 1.533322  | -0.101072 |

|    |   |           |           |           |
|----|---|-----------|-----------|-----------|
| 30 | 6 | -3.250331 | -0.748000 | 0.112108  |
| 31 | 6 | -1.746155 | -2.609125 | -0.507787 |
| 32 | 1 | -0.379229 | -4.126769 | -1.185674 |
| 33 | 6 | -3.509235 | 0.607316  | 0.224123  |
| 34 | 1 | -2.547173 | -3.306357 | -0.287412 |
| 35 | 1 | -4.487682 | 0.943676  | 0.547401  |
| 36 | 6 | 4.278949  | 1.650951  | -1.677014 |
| 37 | 1 | 4.174980  | 0.888237  | -2.458397 |
| 38 | 1 | 3.871592  | 2.582600  | -2.090942 |
| 39 | 1 | 5.345728  | 1.801389  | -1.494748 |
| 40 | 8 | -2.656861 | 2.869332  | -0.045149 |
| 41 | 6 | -3.930157 | 3.424640  | 0.310511  |
| 42 | 1 | -4.211557 | 3.139875  | 1.329963  |
| 43 | 1 | -3.798746 | 4.504459  | 0.257824  |
| 44 | 1 | -4.703620 | 3.114497  | -0.399848 |
| 45 | 1 | -0.501353 | 1.855238  | -0.766643 |
| 46 | 1 | 1.583475  | 2.048271  | -0.431808 |
| 47 | 8 | -4.178110 | -1.694394 | 0.396889  |
| 48 | 1 | -5.025049 | -1.296500 | 0.641918  |

-----  
mPW1PW91/6-31+G(d,p)//B3LYP/6-31+G(d,p):

HF = -965.303968 hartrees (-605737.893 kcal/mol)

MPWB1K/6-31+G(d,p)//B3LYP/6-31+G(d,p):

HF = -965.0283216 hartrees (-605564.9221 kcal/mol)

M06-2X/6-31+G(d,p)//B3LYP/6-31+G(d,p):

HF = -965.0920388 hartrees (-605604.9053 kcal/mol)

**TS** <sub>E2'-c2'</sub>

B3LYP/6-31+G(d,p)//B3LYP/6-31+G(d,p):

HF = -965.4874165 hartrees (-605853.008727915 kcal/mol)

Imaginary Frequencies: 1 (-231.4732 1/cm)

Zero-point correction = 0.408053 (Hartree/Particle)

Coordinates (from last standard orientation):

-----  

| Center<br>Number | Atomic<br>Number | Coordinates (Angstroms) |           |           |
|------------------|------------------|-------------------------|-----------|-----------|
|                  |                  | X                       | Y         | Z         |
| 1                | 6                | -2.035308               | 0.173754  | -1.513360 |
| 2                | 6                | -2.924037               | -0.760775 | -0.788596 |
| 3                | 6                | -2.028182               | -0.026094 | 0.303705  |
| 4                | 6                | -2.613971               | 1.326858  | 0.714116  |
| 5                | 6                | -2.787730               | 2.159014  | -0.320529 |

S71

|    |   |           |           |           |
|----|---|-----------|-----------|-----------|
| 6  | 6 | -2.390972 | 1.631666  | -1.684753 |
| 7  | 1 | -1.203680 | -0.254756 | -2.072989 |
| 8  | 1 | -3.203227 | 3.156608  | -0.226561 |
| 9  | 1 | -3.232313 | 1.694648  | -2.390664 |
| 10 | 1 | -1.561073 | 2.195915  | -2.124853 |
| 11 | 6 | -4.432746 | -0.521118 | -0.747639 |
| 12 | 1 | -4.872120 | -0.868653 | -1.687389 |
| 13 | 1 | -4.874341 | -1.115749 | 0.057430  |
| 14 | 1 | -4.719222 | 0.518537  | -0.599493 |
| 15 | 6 | -2.613639 | -2.239644 | -1.021323 |
| 16 | 1 | -3.016172 | -2.850650 | -0.208419 |
| 17 | 1 | -3.102271 | -2.563772 | -1.945139 |
| 18 | 1 | -1.545655 | -2.444699 | -1.106885 |
| 19 | 6 | -1.249421 | -0.908227 | 1.337423  |
| 20 | 1 | -1.918852 | -1.704166 | 1.672023  |
| 21 | 1 | -1.080096 | -0.249334 | 2.194991  |
| 22 | 6 | 0.070392  | -1.497153 | 0.884306  |
| 23 | 6 | 1.152108  | -0.637836 | 0.490228  |
| 24 | 6 | 0.246870  | -2.870052 | 0.874285  |
| 25 | 6 | 1.072602  | 0.778624  | 0.552952  |
| 26 | 6 | 2.358738  | -1.254259 | 0.016635  |
| 27 | 6 | 1.454429  | -3.462990 | 0.444448  |
| 28 | 1 | -0.566726 | -3.513786 | 1.199037  |
| 29 | 6 | 2.139384  | 1.566956  | 0.135256  |
| 30 | 6 | 3.426288  | -0.405335 | -0.409043 |
| 31 | 6 | 2.488314  | -2.665512 | 0.003568  |
| 32 | 1 | 1.557528  | -4.542863 | 0.453687  |
| 33 | 6 | 3.322508  | 0.973986  | -0.365008 |
| 34 | 1 | 3.415396  | -3.102872 | -0.348287 |
| 35 | 1 | 4.154357  | 1.584718  | -0.697023 |
| 36 | 6 | -2.954248 | 1.618544  | 2.147213  |
| 37 | 1 | -3.612103 | 0.848447  | 2.566893  |
| 38 | 1 | -2.062500 | 1.663745  | 2.782404  |
| 39 | 1 | -3.463330 | 2.581585  | 2.225026  |
| 40 | 8 | 1.968178  | 2.909035  | 0.247390  |
| 41 | 6 | 3.051263  | 3.790868  | -0.063994 |
| 42 | 1 | 3.328429  | 3.720919  | -1.121911 |
| 43 | 1 | 2.679919  | 4.793456  | 0.146234  |
| 44 | 1 | 3.922050  | 3.585586  | 0.568099  |
| 45 | 1 | -1.101173 | 0.358060  | -0.323979 |
| 46 | 1 | 0.239447  | 1.292840  | 1.018749  |
| 47 | 8 | 4.542858  | -1.035530 | -0.857653 |
| 48 | 1 | 5.233590  | -0.399453 | -1.088214 |

-----  
mPW1PW91/6-31+G(d,p)//B3LYP/6-31+G(d,p):

S72



HF = -965.270095 hartrees (-605716.6373 kcal/mol)

MPWB1K/6-31+G(d,p)//B3LYP/6-31+G(d,p):

HF = -964.9957417 hartrees (-605544.4779 kcal/mol)

M06-2X/6-31+G(d,p)//B3LYP/6-31+G(d,p):

HF = -965.0601947 hartrees (-605584.9227 kcal/mol)

## C2'

B3LYP/6-31+G(d,p)//B3LYP/6-31+G(d,p):

HF = -965.5363118 hartrees (-605883.691017618 kcal/mol)

Imaginary Frequencies: none found

Zero-point correction = 0.410744 (Hartree/Particle)

Coordinates (from last standard orientation):

| -----  |        |                         |           |           |
|--------|--------|-------------------------|-----------|-----------|
| Center | Atomic | Coordinates (Angstroms) |           |           |
| Number | Number | X                       | Y         | Z         |
| -----  |        |                         |           |           |
| 1      | 6      | -2.785973               | 0.504530  | -1.805632 |
| 2      | 6      | -2.414077               | -0.743370 | -0.971773 |
| 3      | 6      | -1.998667               | -0.332976 | 0.430383  |
| 4      | 6      | -2.627800               | 0.789023  | 1.063030  |
| 5      | 6      | -3.498226               | 1.571154  | 0.332174  |
| 6      | 6      | -3.789439               | 1.418291  | -1.108091 |
| 7      | 1      | -3.176666               | 0.177191  | -2.773528 |
| 8      | 1      | -4.027924               | 2.363542  | 0.859701  |
| 9      | 1      | -4.823192               | 1.037290  | -1.188788 |
| 10     | 1      | -3.834558               | 2.411248  | -1.574558 |
| 11     | 6      | -3.668922               | -1.668355 | -0.778094 |
| 12     | 1      | -4.026614               | -1.961240 | -1.769919 |
| 13     | 1      | -3.407653               | -2.581400 | -0.237379 |
| 14     | 1      | -4.486550               | -1.176497 | -0.245137 |
| 15     | 6      | -1.361515               | -1.545846 | -1.763795 |
| 16     | 1      | -1.123383               | -2.503714 | -1.301035 |
| 17     | 1      | -1.770018               | -1.750866 | -2.758054 |
| 18     | 1      | -0.432827               | -0.984607 | -1.887979 |
| 19     | 6      | -1.141083               | -1.238432 | 1.274193  |
| 20     | 1      | -1.707454               | -2.180240 | 1.348813  |
| 21     | 1      | -1.086044               | -0.840592 | 2.288675  |
| 22     | 6      | 0.271851                | -1.608687 | 0.813598  |
| 23     | 6      | 1.207666                | -0.588839 | 0.454974  |
| 24     | 6      | 0.660536                | -2.934331 | 0.816723  |
| 25     | 6      | 0.885496                | 0.791512  | 0.484488  |
| 26     | 6      | 2.516113                | -0.997920 | 0.036065  |
| 27     | 6      | 1.963832                | -3.323079 | 0.431011  |

|    |   |           |           |           |
|----|---|-----------|-----------|-----------|
| 28 | 1 | -0.051021 | -3.703423 | 1.107372  |
| 29 | 6 | 1.803774  | 1.746849  | 0.063217  |
| 30 | 6 | 3.434220  | 0.017033  | -0.376796 |
| 31 | 6 | 2.874967  | -2.369229 | 0.034099  |
| 32 | 1 | 2.233658  | -4.373837 | 0.435759  |
| 33 | 6 | 3.090369  | 1.359052  | -0.376049 |
| 34 | 1 | 3.872747  | -2.650432 | -0.281624 |
| 35 | 1 | 3.815417  | 2.097467  | -0.699190 |
| 36 | 6 | -2.409710 | 1.122579  | 2.528400  |
| 37 | 1 | -2.755841 | 0.319317  | 3.186668  |
| 38 | 1 | -1.355930 | 1.308758  | 2.757012  |
| 39 | 1 | -2.962686 | 2.025840  | 2.794101  |
| 40 | 8 | 1.389820  | 3.039017  | 0.123335  |
| 41 | 6 | 2.301933  | 4.088413  | -0.214760 |
| 42 | 1 | 2.613370  | 4.019885  | -1.263083 |
| 43 | 1 | 1.750309  | 5.015494  | -0.061491 |
| 44 | 1 | 3.179525  | 4.074262  | 0.440849  |
| 45 | 1 | -1.868297 | 1.069731  | -2.008147 |
| 46 | 1 | -0.043670 | 1.150518  | 0.904461  |
| 47 | 8 | 4.655356  | -0.417688 | -0.778199 |
| 48 | 1 | 5.221815  | 0.321452  | -1.038771 |

-----  
mPW1PW91/6-31+G(d,p)//B3LYP/6-31+G(d,p):  
HF = -965.3112794 hartrees (-605742.4809 kcal/mol)

MPWB1K/6-31+G(d,p)//B3LYP/6-31+G(d,p):  
HF = -965.0335589 hartrees (-605568.2085 kcal/mol)

M06-2X/6-31+G(d,p)//B3LYP/6-31+G(d,p):  
HF = -965.0991317 hartrees (-605609.3561 kcal/mol)

**TS** *c2'-D2'*  
B3LYP/6-31+G(d,p)//B3LYP/6-31+G(d,p):  
HF = -965.5289806 hartrees (-605879.090616306 kcal/mol)  
Imaginary Frequencies: 1 (-174.4207 1/cm)  
Zero-point correction = 0.411392 (Hartree/Particle)

Coordinates (from last standard orientation):

-----

| Center<br>Number | Atomic<br>Number | Coordinates (Angstroms) |           |           |
|------------------|------------------|-------------------------|-----------|-----------|
|                  |                  | X                       | Y         | Z         |
| 1                | 6                | -2.217958               | 0.464923  | -1.739476 |
| 2                | 6                | -1.631378               | -0.866205 | -1.218538 |
| 3                | 6                | -1.452989               | -0.789265 | 0.308511  |

|    |   |           |           |           |
|----|---|-----------|-----------|-----------|
| 4  | 6 | -2.527546 | -0.136857 | 1.063002  |
| 5  | 6 | -3.474872 | 0.598940  | 0.417165  |
| 6  | 6 | -3.523545 | 0.856356  | -1.048578 |
| 7  | 1 | -2.369097 | 0.386219  | -2.820936 |
| 8  | 1 | -4.284435 | 1.017634  | 1.012706  |
| 9  | 1 | -4.382114 | 0.305003  | -1.464154 |
| 10 | 1 | -3.761648 | 1.913188  | -1.224166 |
| 11 | 6 | -2.638946 | -2.032781 | -1.490603 |
| 12 | 1 | -2.880264 | -2.040183 | -2.557951 |
| 13 | 1 | -2.199969 | -3.004501 | -1.249968 |
| 14 | 1 | -3.570380 | -1.930786 | -0.929157 |
| 15 | 6 | -0.356060 | -1.173178 | -2.025792 |
| 16 | 1 | 0.114416  | -2.114890 | -1.736881 |
| 17 | 1 | -0.627200 | -1.253899 | -3.082928 |
| 18 | 1 | 0.384133  | -0.374718 | -1.934463 |
| 19 | 6 | -0.685267 | -1.922884 | 1.009028  |
| 20 | 1 | -1.063950 | -2.880263 | 0.631166  |
| 21 | 1 | -0.908551 | -1.910304 | 2.078500  |
| 22 | 6 | 0.812701  | -1.833070 | 0.791478  |
| 23 | 6 | 1.284747  | -0.519693 | 0.609823  |
| 24 | 6 | 1.685729  | -2.899482 | 0.658627  |
| 25 | 6 | 0.348585  | 0.556862  | 0.806286  |
| 26 | 6 | 2.592611  | -0.301490 | 0.117063  |
| 27 | 6 | 3.028774  | -2.675638 | 0.277840  |
| 28 | 1 | 1.334319  | -3.918396 | 0.797910  |
| 29 | 6 | 0.709935  | 1.846456  | 0.333644  |
| 30 | 6 | 2.908163  | 1.033429  | -0.305771 |
| 31 | 6 | 3.473461  | -1.400920 | -0.027345 |
| 32 | 1 | 3.699667  | -3.521458 | 0.169829  |
| 33 | 6 | 1.971235  | 2.066991  | -0.252645 |
| 34 | 1 | 4.478927  | -1.237570 | -0.397646 |
| 35 | 1 | 2.252326  | 3.051673  | -0.608699 |
| 36 | 6 | -2.624071 | -0.285978 | 2.569408  |
| 37 | 1 | -2.852186 | -1.314746 | 2.868834  |
| 38 | 1 | -1.699024 | 0.000296  | 3.084478  |
| 39 | 1 | -3.418474 | 0.352513  | 2.961129  |
| 40 | 8 | -0.183287 | 2.819544  | 0.564555  |
| 41 | 6 | 0.136303  | 4.187325  | 0.254706  |
| 42 | 1 | 0.292547  | 4.316541  | -0.820837 |
| 43 | 1 | -0.731454 | 4.764017  | 0.570924  |
| 44 | 1 | 1.019599  | 4.512564  | 0.812847  |
| 45 | 1 | -1.475438 | 1.254603  | -1.579067 |
| 46 | 1 | -0.240797 | 0.571066  | 1.714123  |
| 47 | 8 | 4.143199  | 1.215882  | -0.797270 |
| 48 | 1 | 4.292093  | 2.129938  | -1.080871 |

mPW1PW91/6-31+G(d,p)//B3LYP/6-31+G(d,p):  
HF = -965.307472 hartrees (-605740.0918 kcal/mol)

MPWB1K/6-31+G(d,p)//B3LYP/6-31+G(d,p):  
HF = -965.0295455 hartrees (-605565.6901 kcal/mol)

M06-2X/6-31+G(d,p)//B3LYP/6-31+G(d,p):  
HF = -965.0957452 hartrees (-605607.2311 kcal/mol)

## D2'

B3LYP/6-31+G(d,p)//B3LYP/6-31+G(d,p):  
HF = -965.5469796 hartrees (-605890.385168796 kcal/mol)  
Imaginary Frequencies: none found  
Zero-point correction = 0.414020 (Hartree/Particle)

Coordinates (from last standard orientation):

-----

| Center<br>Number | Atomic<br>Number | Coordinates (Angstroms) |           |           |
|------------------|------------------|-------------------------|-----------|-----------|
|                  |                  | X                       | Y         | Z         |
| 1                | 6                | -2.337872               | 0.367941  | -1.609957 |
| 2                | 6                | -1.415989               | -0.821372 | -1.242098 |
| 3                | 6                | -1.060671               | -0.767220 | 0.308748  |
| 4                | 6                | -2.307556               | -0.469508 | 1.156290  |
| 5                | 6                | -3.430268               | 0.043293  | 0.625511  |
| 6                | 6                | -3.646432               | 0.375401  | -0.819234 |
| 7                | 1                | -2.548368               | 0.321193  | -2.684506 |
| 8                | 1                | -4.274229               | 0.219881  | 1.290770  |
| 9                | 1                | -4.362926               | -0.340963 | -1.247042 |
| 10               | 1                | -4.137894               | 1.353046  | -0.903911 |
| 11               | 6                | -2.175465               | -2.135102 | -1.568346 |
| 12               | 1                | -2.652226               | -2.042530 | -2.549409 |
| 13               | 1                | -1.503613               | -2.995670 | -1.627914 |
| 14               | 1                | -2.956019               | -2.362095 | -0.837575 |
| 15               | 6                | -0.186440               | -0.759325 | -2.171318 |
| 16               | 1                | 0.504353                | -1.592341 | -2.021257 |
| 17               | 1                | -0.525706               | -0.805752 | -3.211413 |
| 18               | 1                | 0.373388                | 0.176573  | -2.064078 |
| 19               | 6                | -0.327679               | -2.097123 | 0.776378  |
| 20               | 1                | -0.699603               | -2.979325 | 0.255836  |
| 21               | 1                | -0.506755               | -2.271531 | 1.841730  |
| 22               | 6                | 1.146476                | -1.854973 | 0.553902  |
| 23               | 6                | 1.371450                | -0.487360 | 0.462347  |
| 24               | 6                | 2.224743                | -2.721569 | 0.395065  |
| 25               | 6                | 0.121068                | 0.282323  | 0.696065  |

|    |   |           |           |           |
|----|---|-----------|-----------|-----------|
| 26 | 6 | 2.618870  | 0.048176  | 0.125476  |
| 27 | 6 | 3.506232  | -2.198246 | 0.113821  |
| 28 | 1 | 2.090013  | -3.797539 | 0.462095  |
| 29 | 6 | 0.239487  | 1.713740  | 0.291634  |
| 30 | 6 | 2.636901  | 1.459552  | -0.138158 |
| 31 | 6 | 3.713412  | -0.833109 | -0.042221 |
| 32 | 1 | 4.340046  | -2.880799 | -0.013451 |
| 33 | 6 | 1.472387  | 2.251358  | -0.080746 |
| 34 | 1 | 4.690581  | -0.446846 | -0.308659 |
| 35 | 1 | 1.559766  | 3.308570  | -0.304786 |
| 36 | 6 | -2.265317 | -0.755393 | 2.644872  |
| 37 | 1 | -2.306898 | -1.828747 | 2.865253  |
| 38 | 1 | -1.360049 | -0.372137 | 3.135753  |
| 39 | 1 | -3.118765 | -0.290434 | 3.143573  |
| 40 | 8 | -0.847391 | 2.434919  | 0.463300  |
| 41 | 6 | -0.844347 | 3.868318  | 0.266147  |
| 42 | 1 | -0.610250 | 4.107136  | -0.774663 |
| 43 | 1 | -1.857406 | 4.186309  | 0.503719  |
| 44 | 1 | -0.132315 | 4.340282  | 0.948323  |
| 45 | 1 | -1.809047 | 1.311151  | -1.444409 |
| 46 | 1 | 0.008707  | 0.371980  | 1.792764  |
| 47 | 8 | 3.811546  | 1.980409  | -0.468956 |
| 48 | 1 | 3.764038  | 2.929172  | -0.666574 |

-----  
mPW1PW91/6-31+G(d,p)//B3LYP/6-31+G(d,p):  
HF = -965.3321634 hartrees (-605755.5859 kcal/mol)

MPWB1K/6-31+G(d,p)//B3LYP/6-31+G(d,p):  
HF = -965.0606896 hartrees (-605585.2333 kcal/mol)

M06-2X/6-31+G(d,p)//B3LYP/6-31+G(d,p):  
HF = -965.1256303 hartrees (-605625.9843 kcal/mol)

**Table S5 (i).** IRC plots. Path 1: **A1**→**D1**  
 Correspond to structures in Figure S10(i).

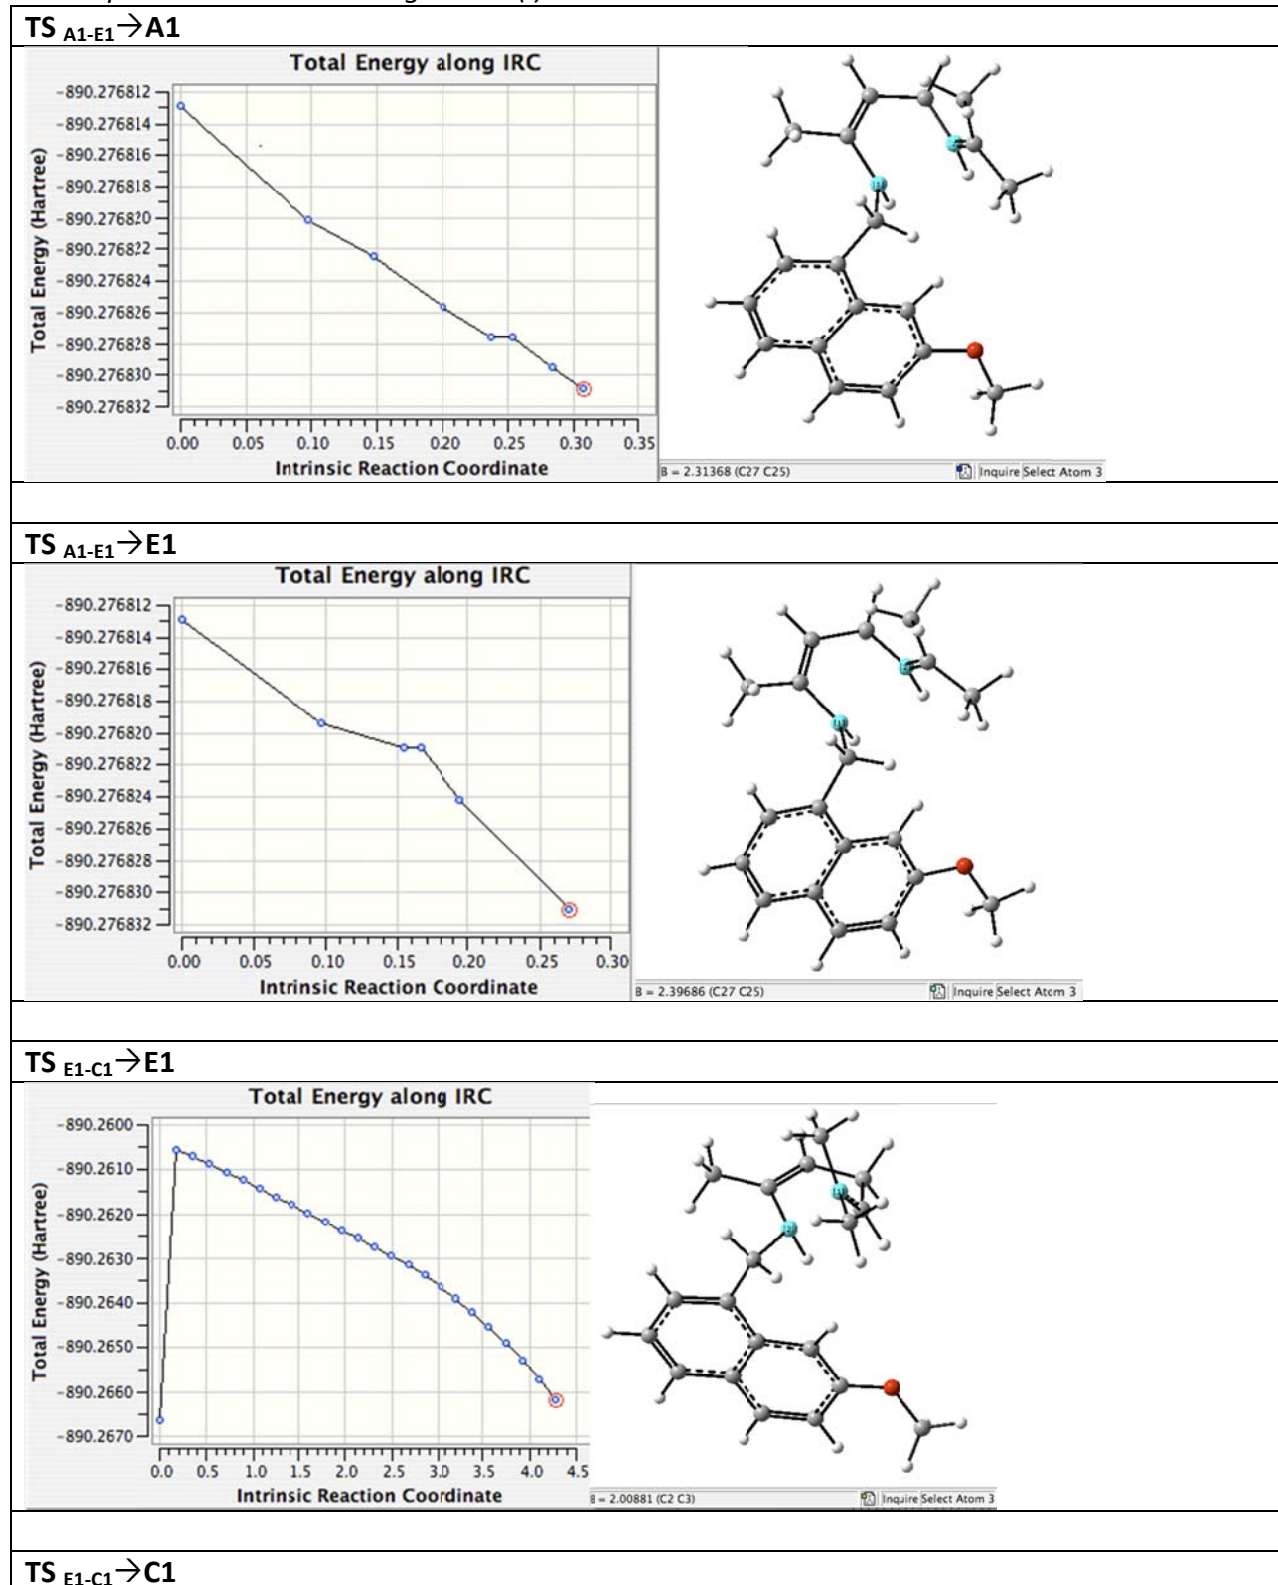

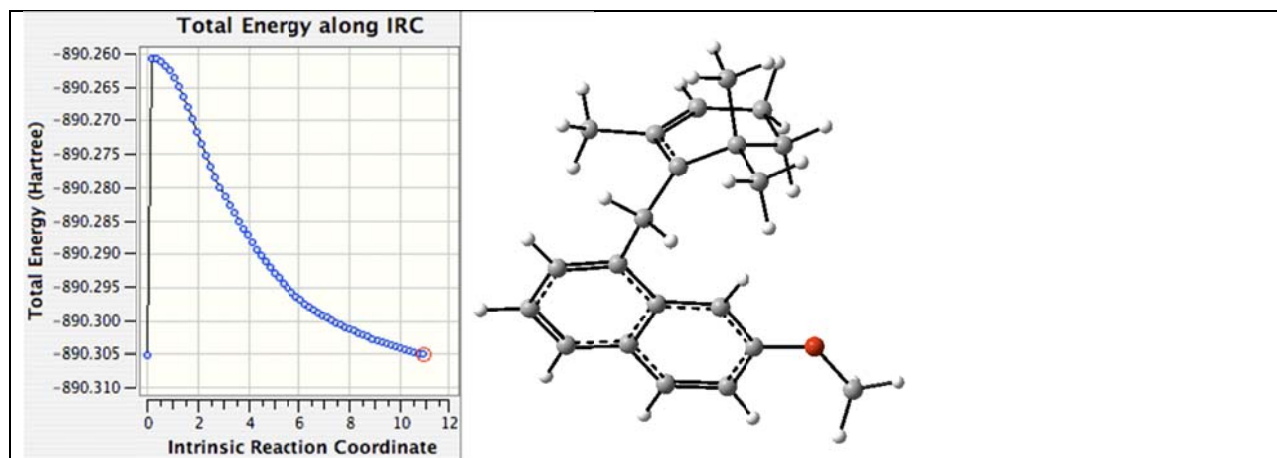

**TS C1-D1 → C1**

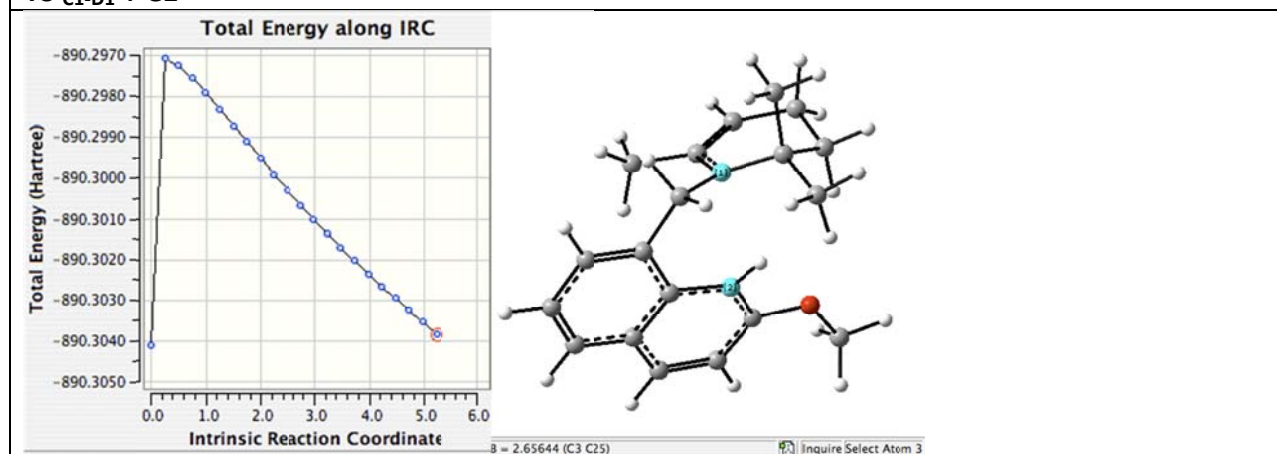

**TS C1-D1 → D1**

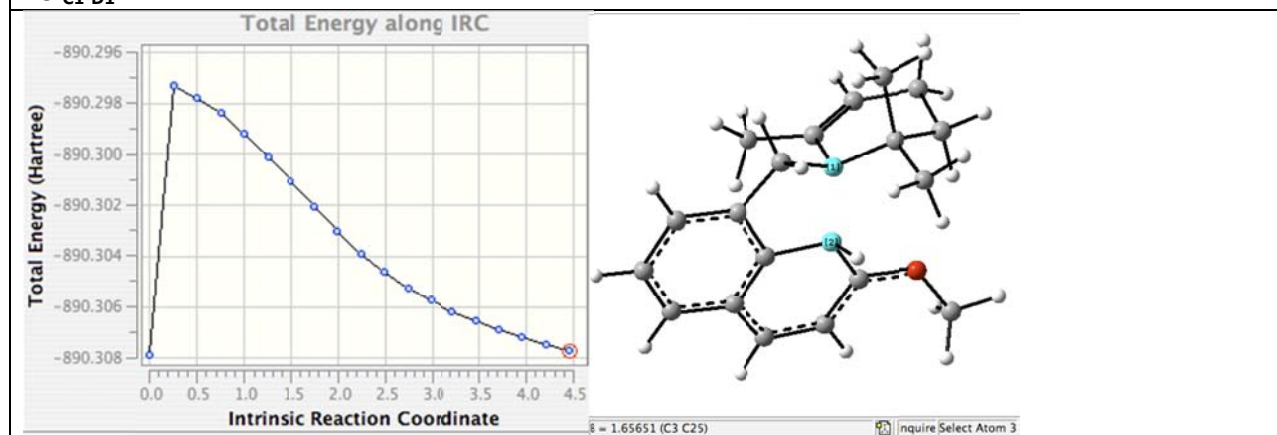

**Table S5 (ii).** IRC plots. Path 1: **A1**→**D1**  
 Correspond to structures in Figure S10(ii).

**TS**  $A2-E2 \rightarrow A2$

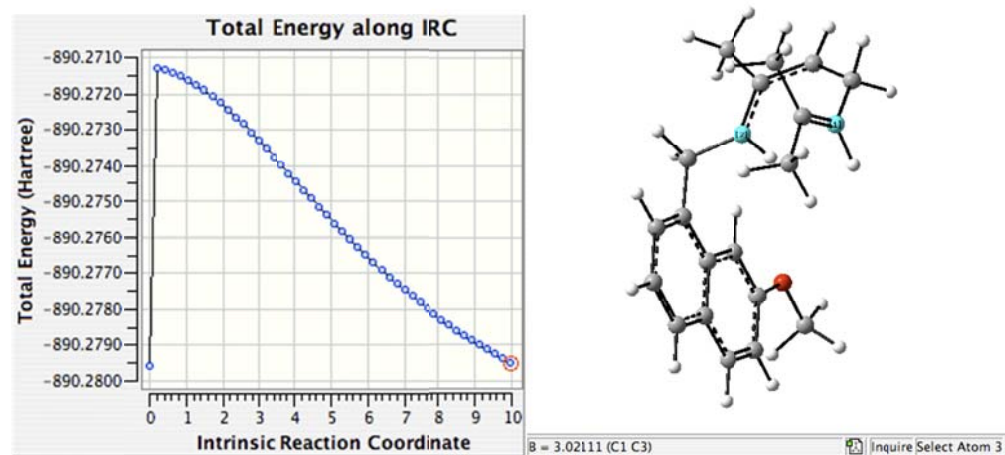

**TS**  $A2-E2 \rightarrow E2$

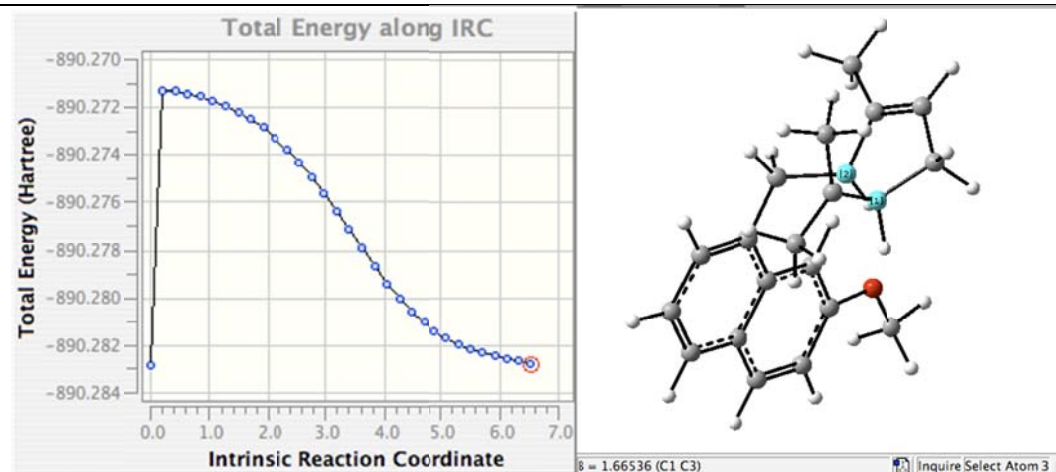

**TS**  $E2-C2 \rightarrow E2$

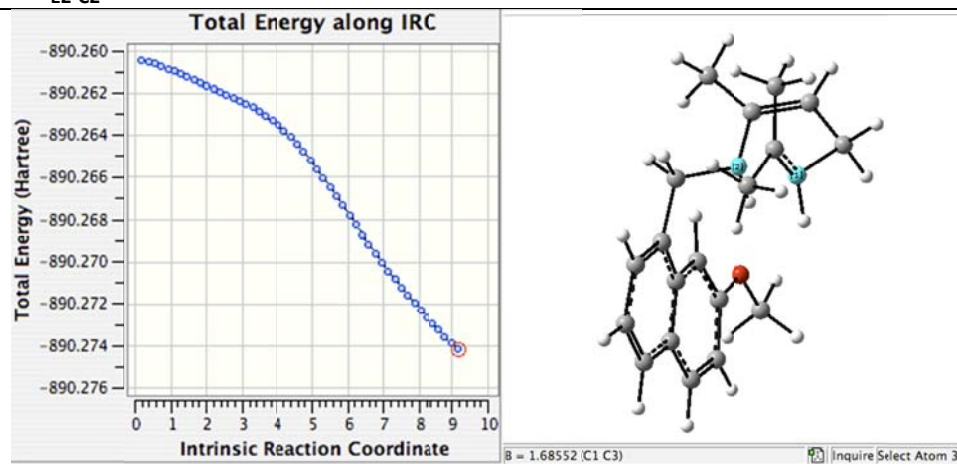

**TS**  $E2-C2 \rightarrow C2$



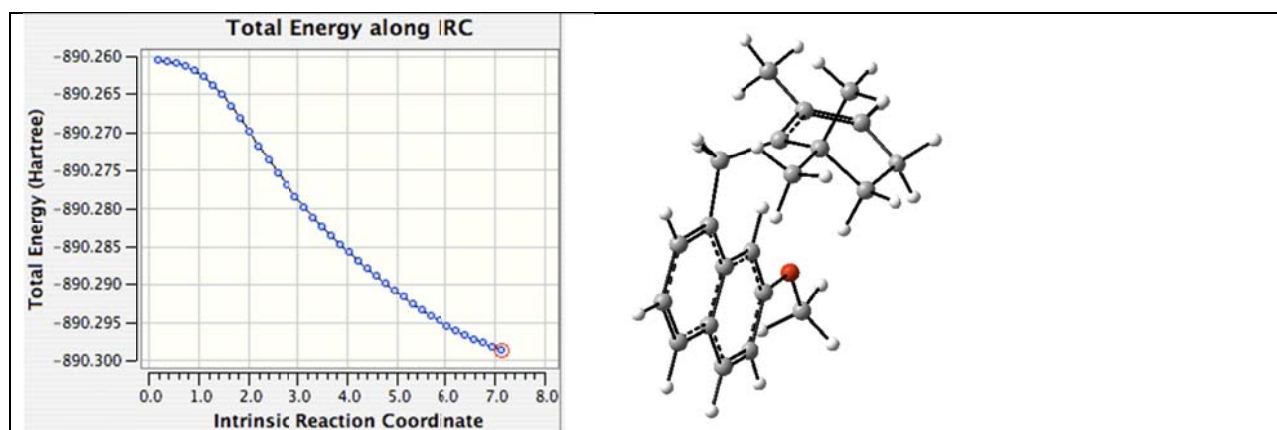

**TS C2-D2 → C2**

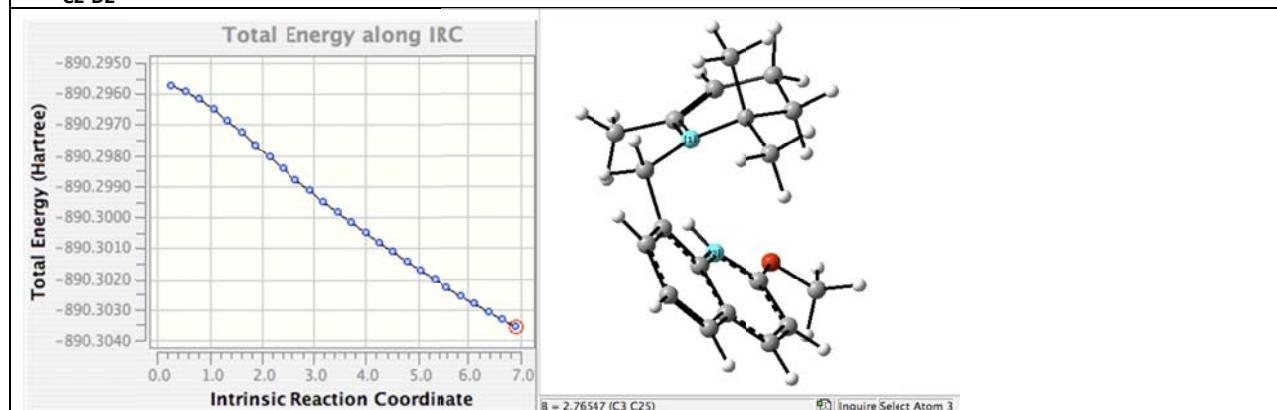

**TS C2-D2 → D2**

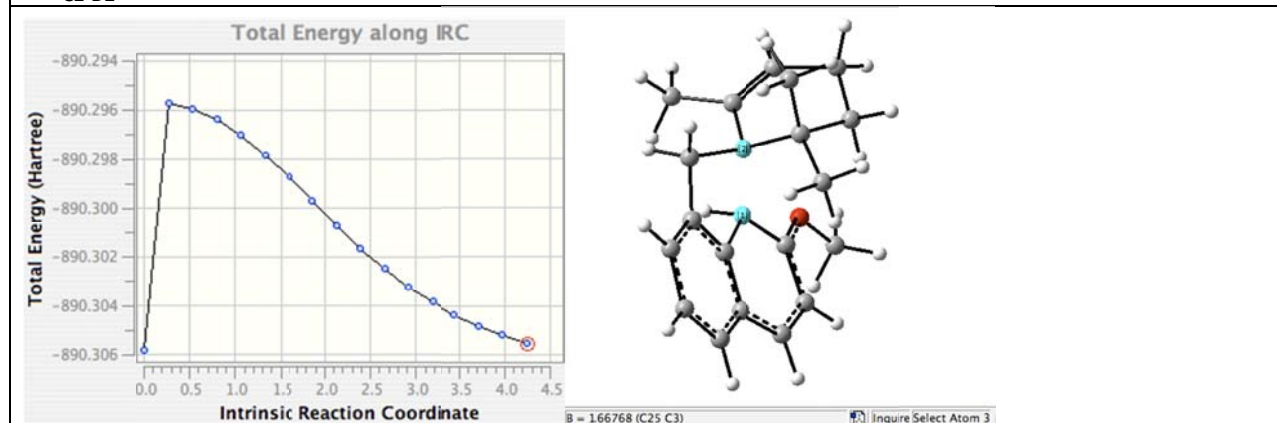

**Table S5 (iii).** IRC plots. **E2**→**F1** conversion  
Correspond to structures in Figure S10(iii).

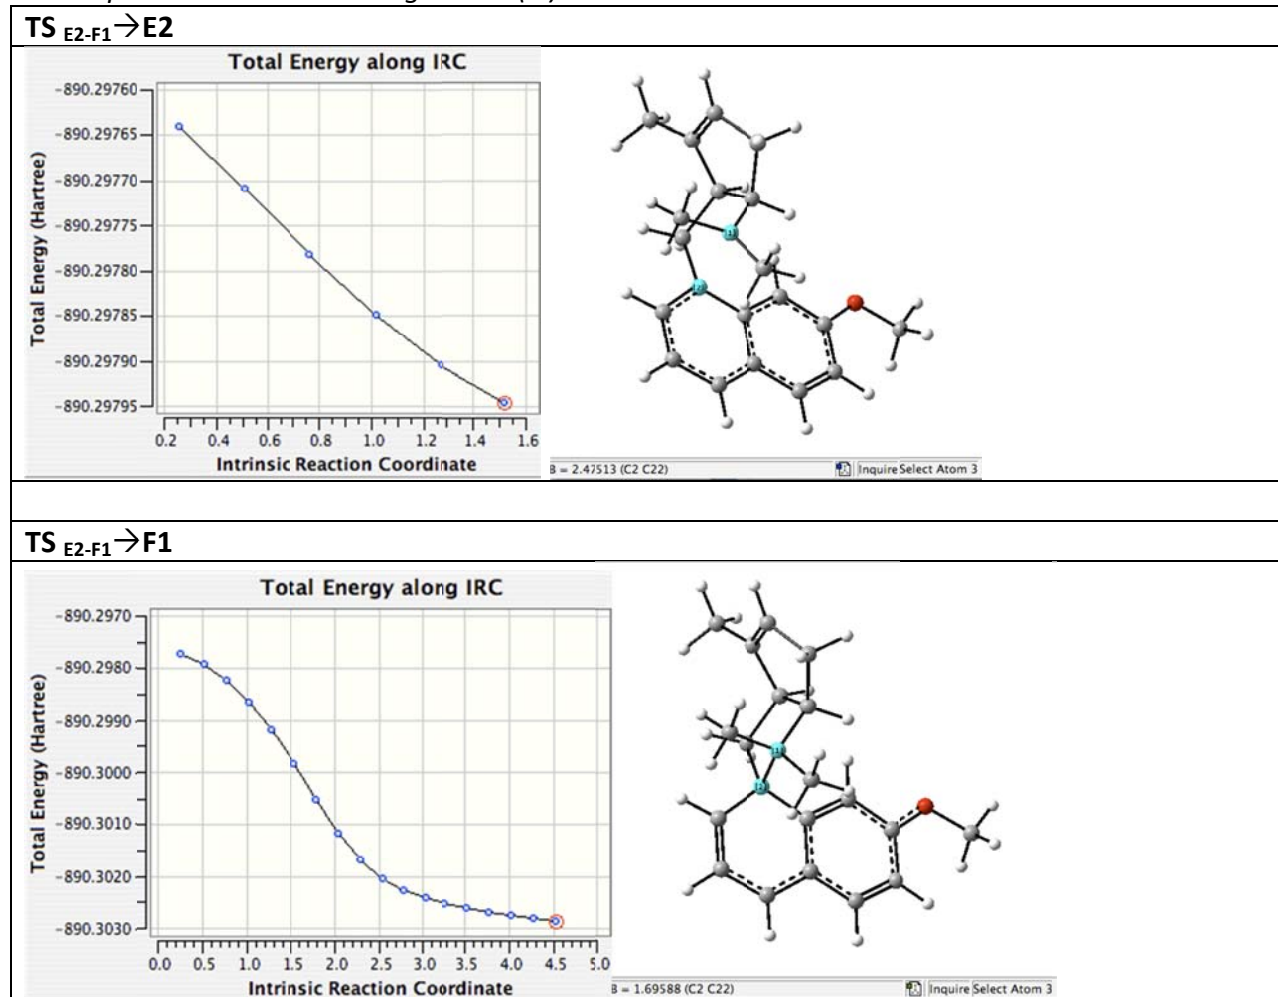

**Table S5 (iv).** IRC plots. Path 3: **E3**→**D3**  
 Correspond to structures in Figure S10(iv).

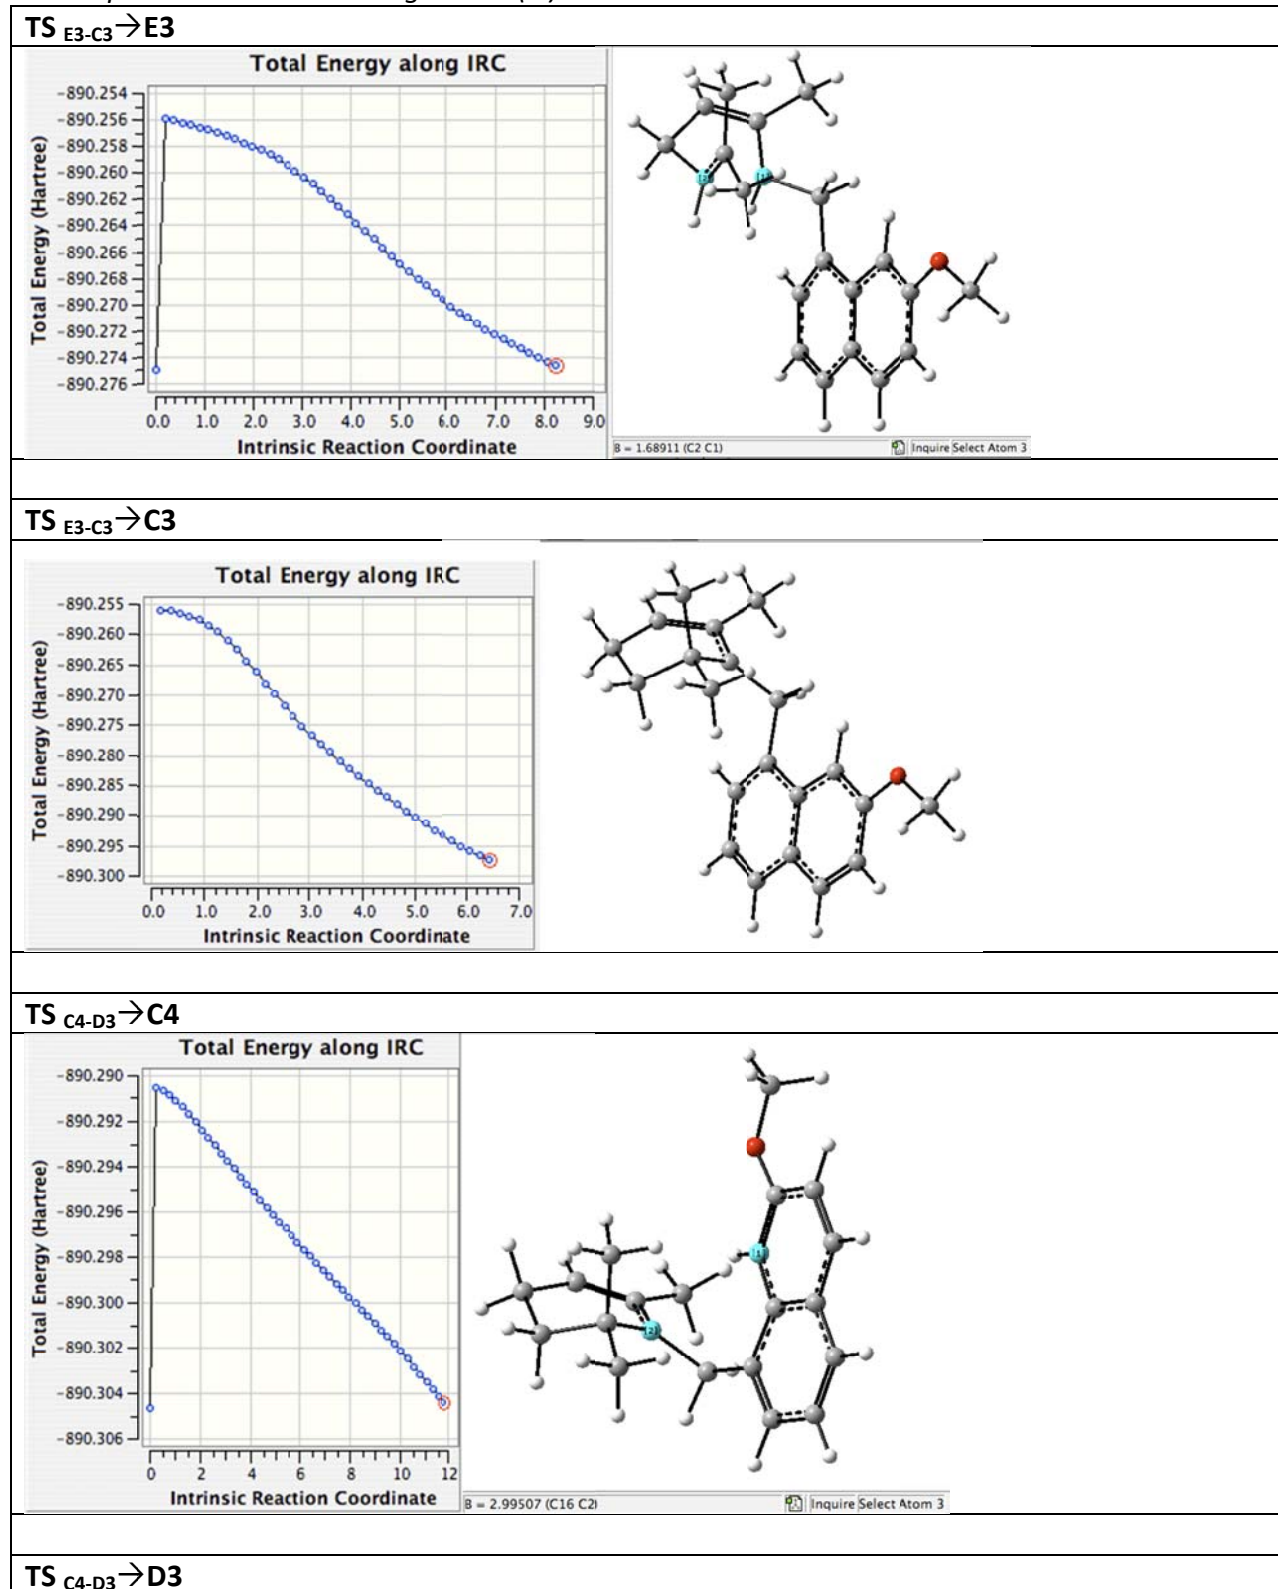

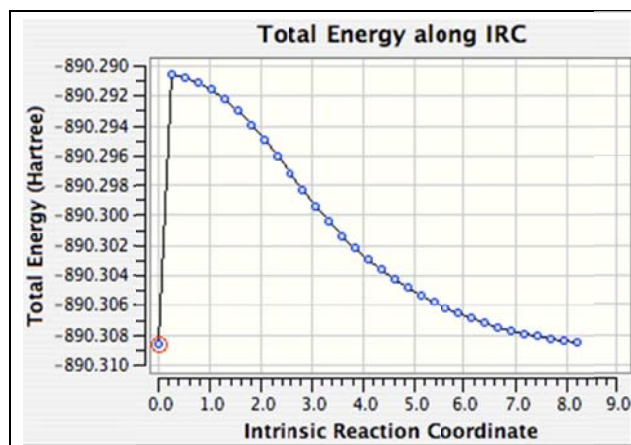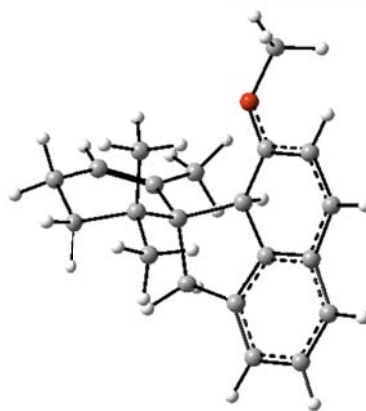

**Table S5 (v).** IRC plots. Path 4: **E4**→**D4**  
 Correspond to structures in Figure S10(v).

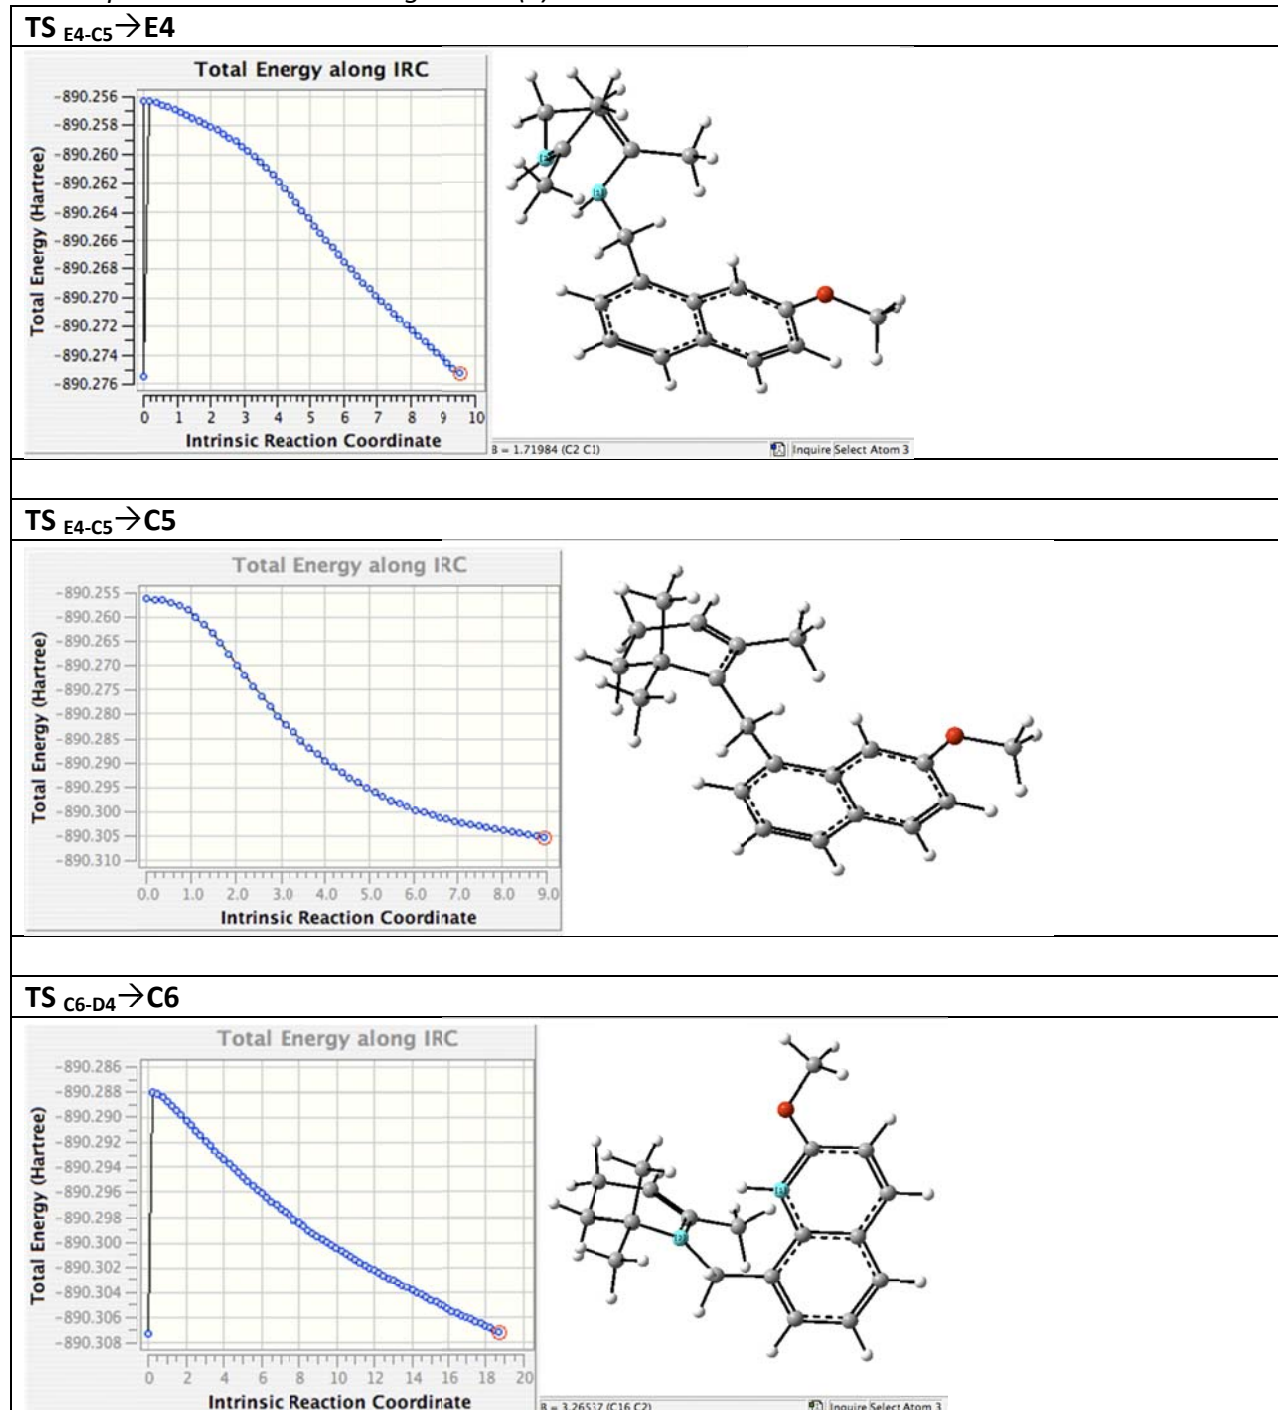

TS C6-D4 → D4

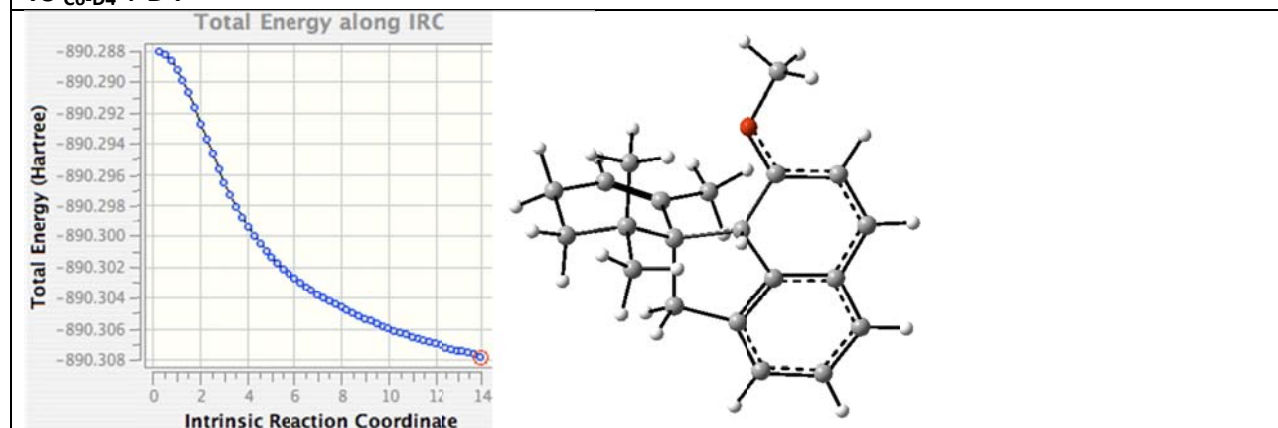

**Table S5 (vi).** IRC plots. Path 1:  $A1' \rightarrow D1'$   
 Correspond to structures in Figure S10(vii).

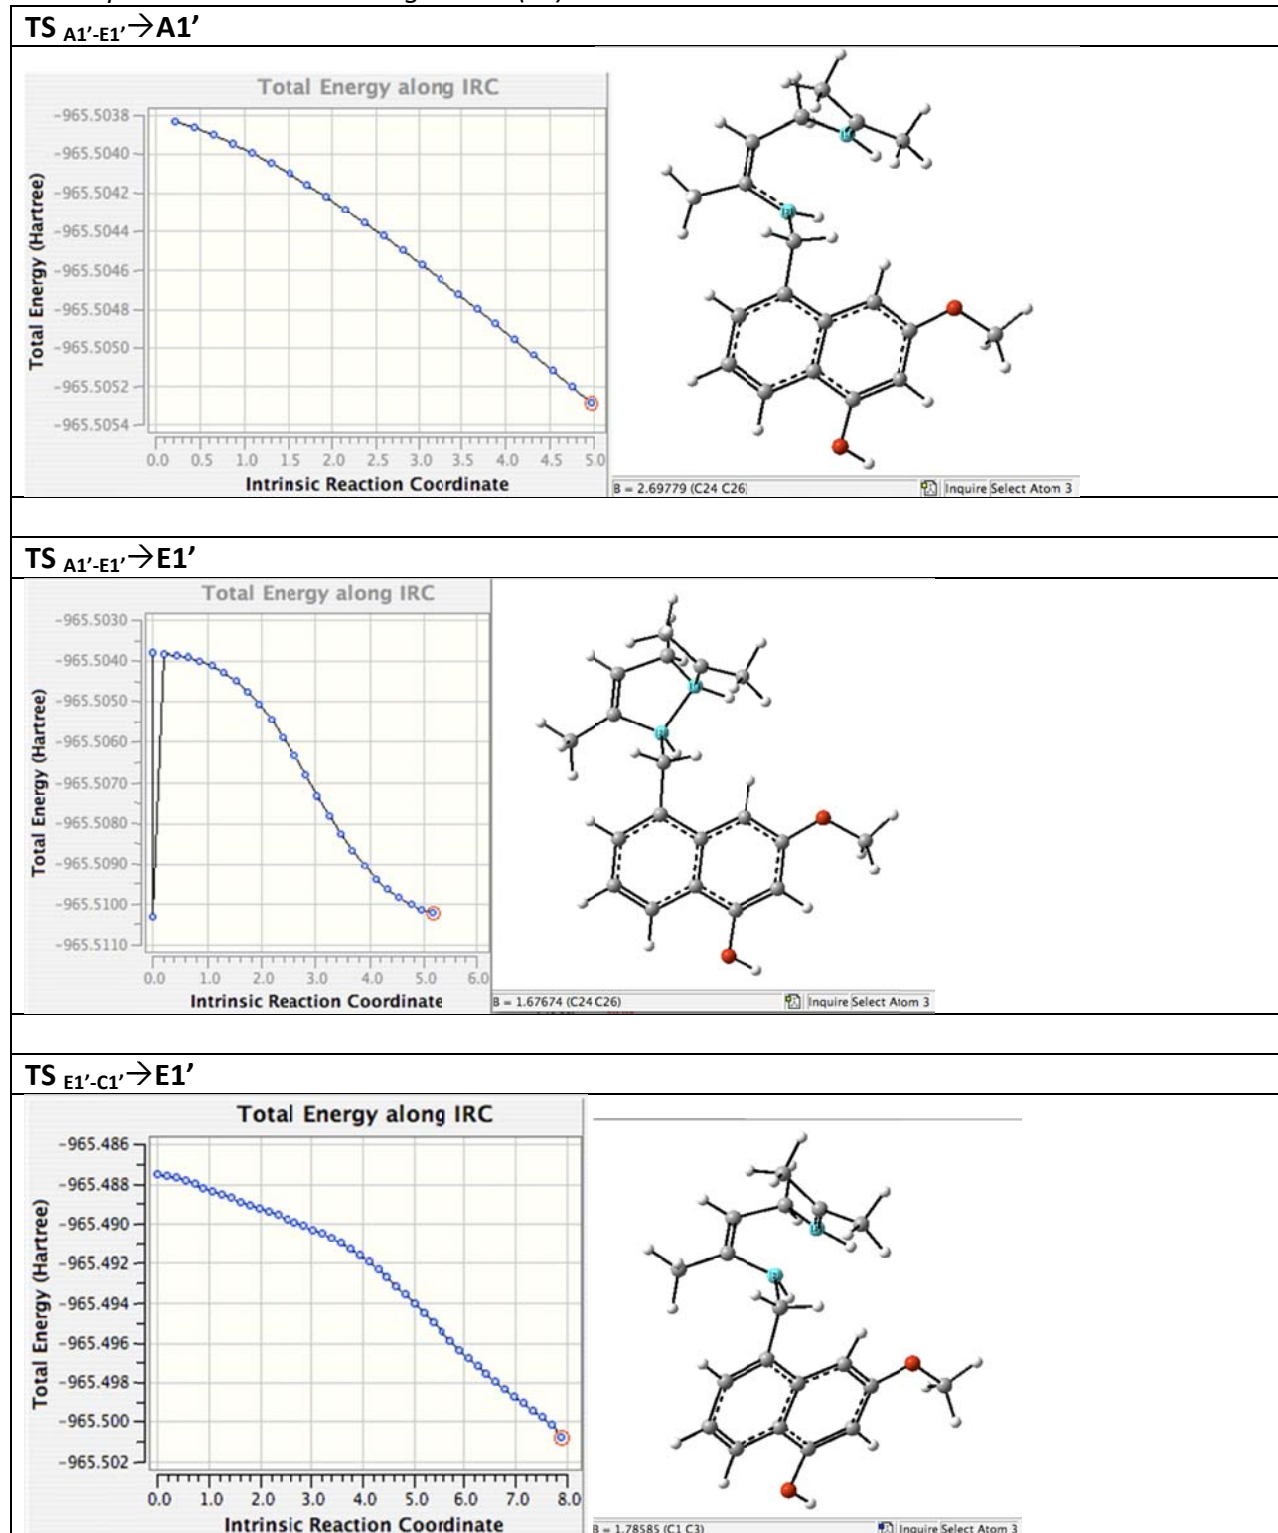

TS E1'-C1' → C1'

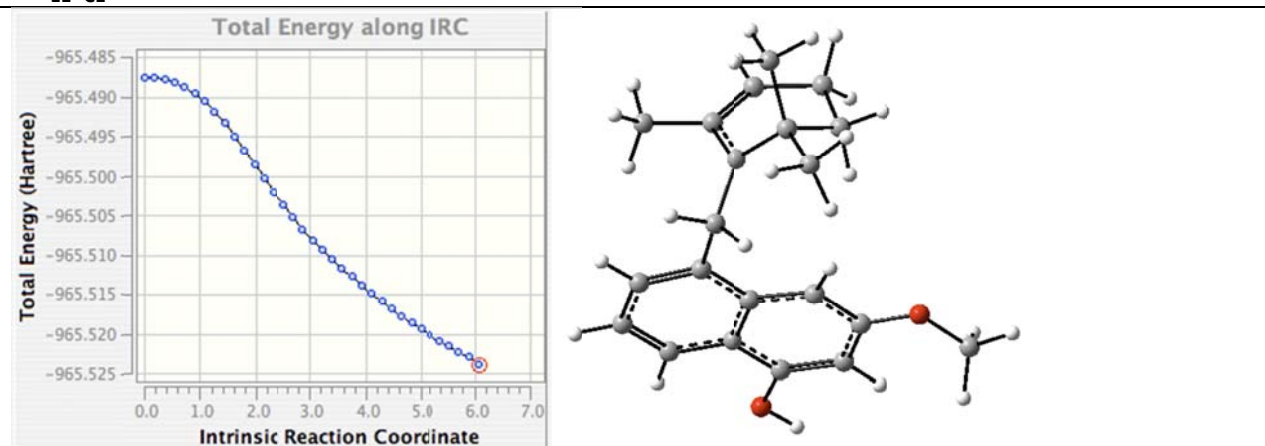

TS C1'-D1' → C1'

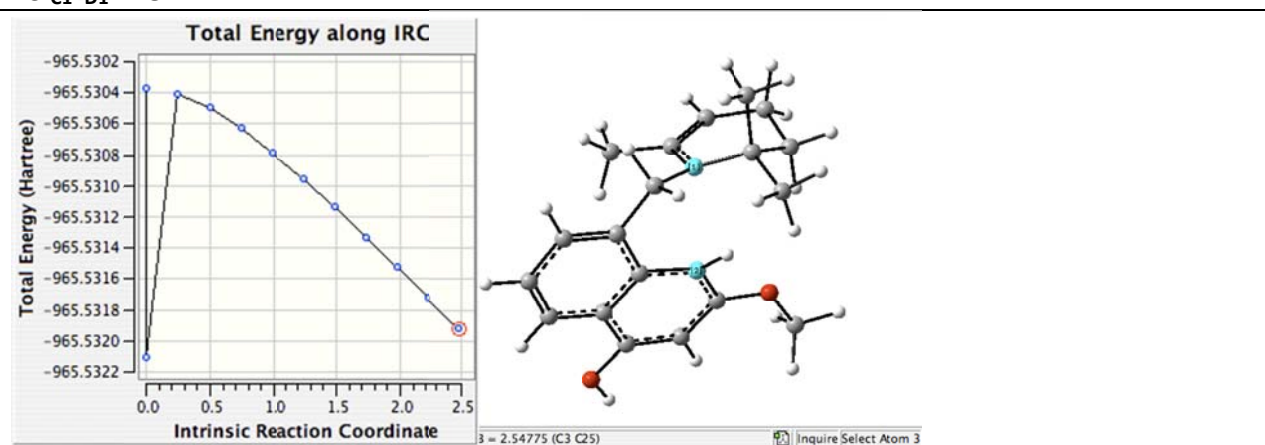

TS C1'-D1' → D1'

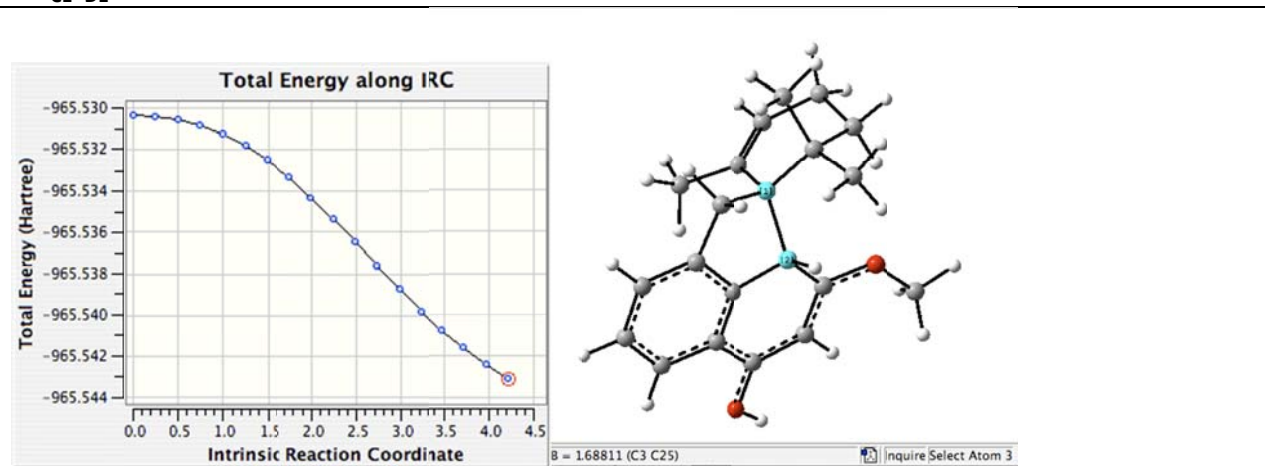



**Table S5 (vii).** IRC plots. Path 2:  $A2' \rightarrow D2'$   
 Correspond to structures in Figure S10(viii).

**TS  $A2'-E2' \rightarrow A2'$**

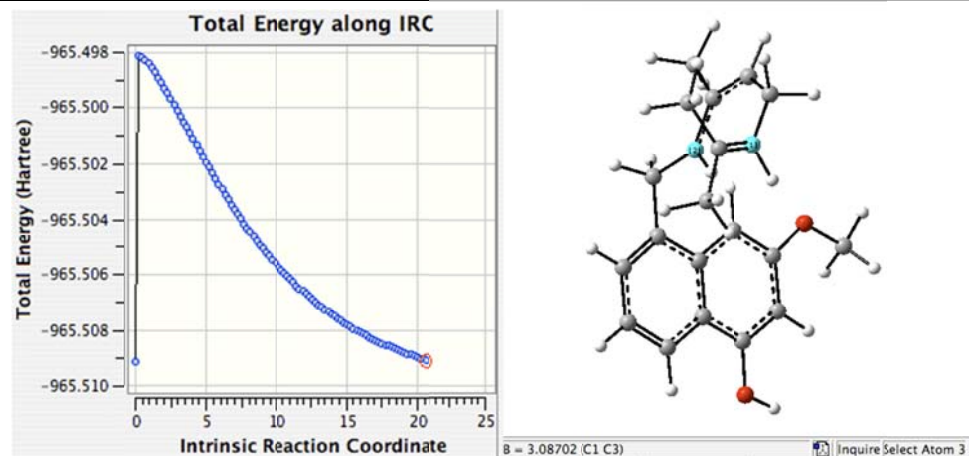

**TS  $A2'-E2' \rightarrow E2'$**

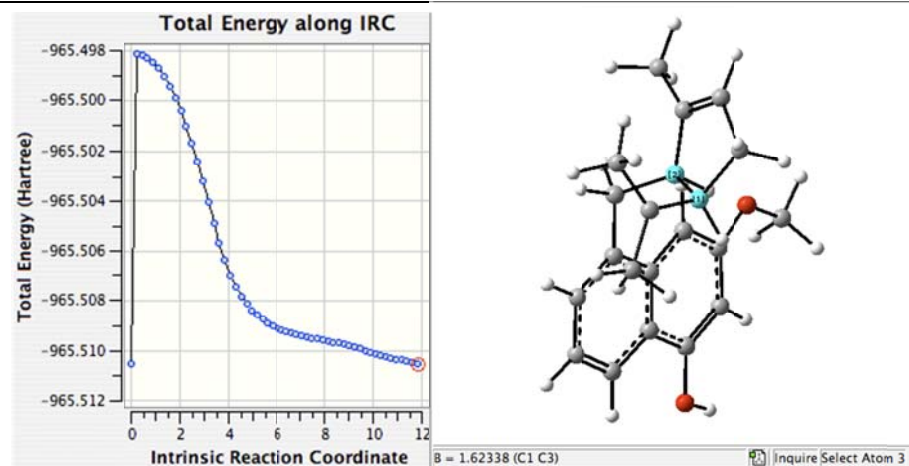

**TS  $E2'-C2' \rightarrow E2'$**

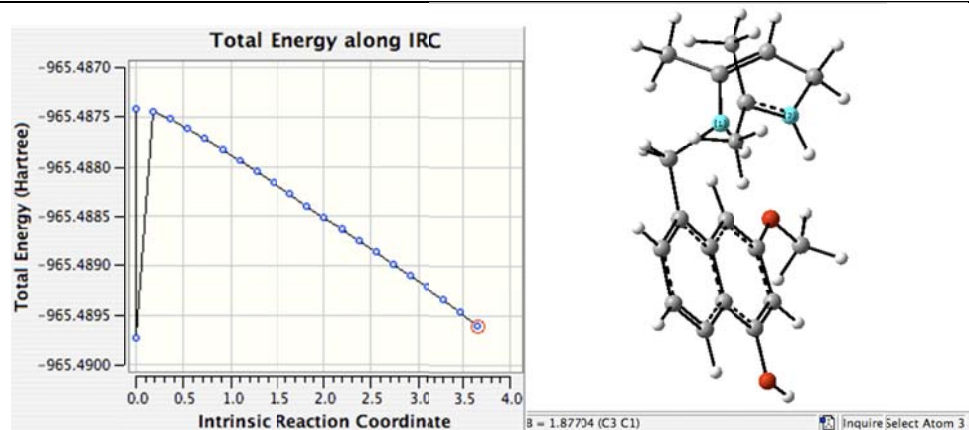

TS  $E2'-C2' \rightarrow C2'$

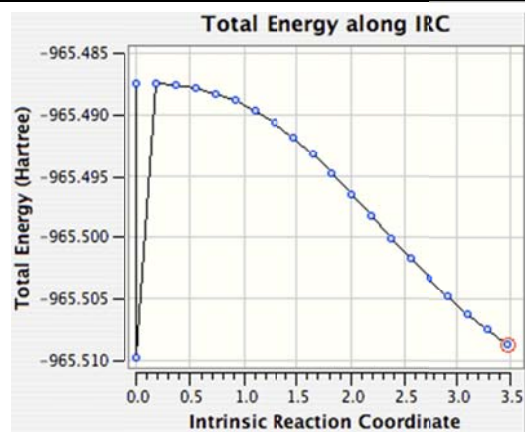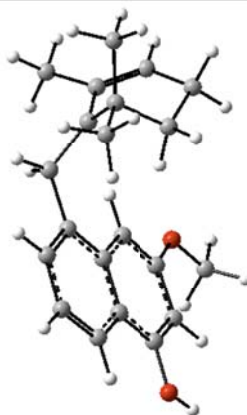

TS  $C2'-D2' \rightarrow C2'$

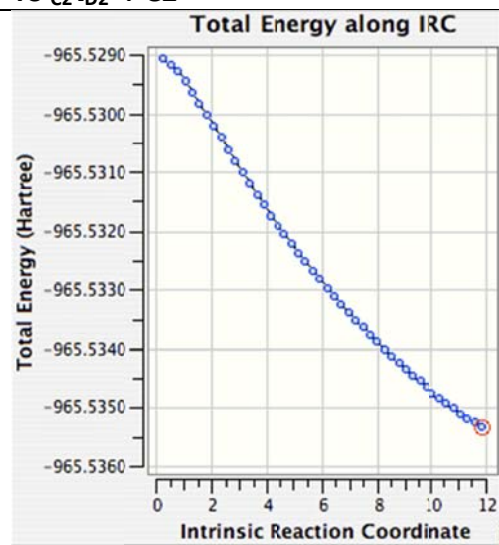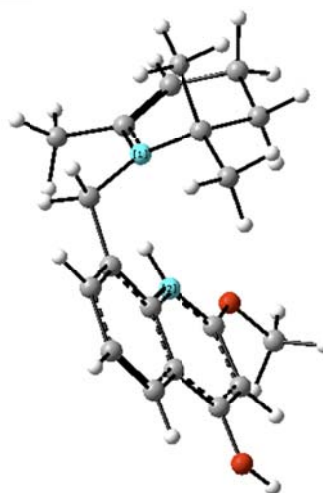

B = 2.94180 (C3 C25)

Inquire Select Atom 3

TS  $C2'-D2' \rightarrow D2'$

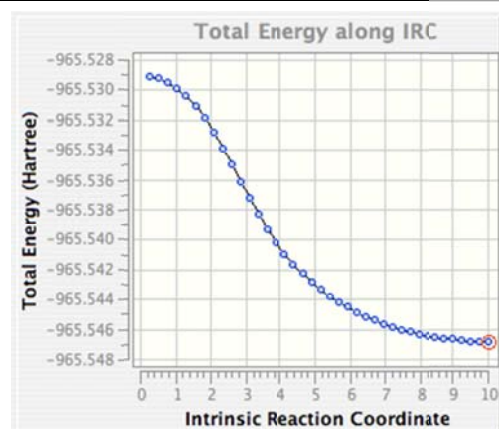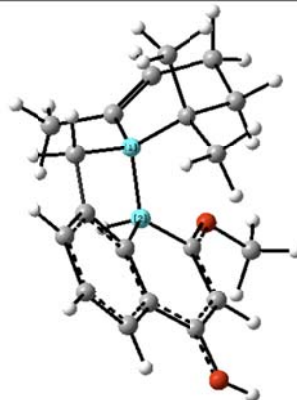

B = 1.62768 (C3 C25)

Inquire Select Atom 3

## Supplementary Figures

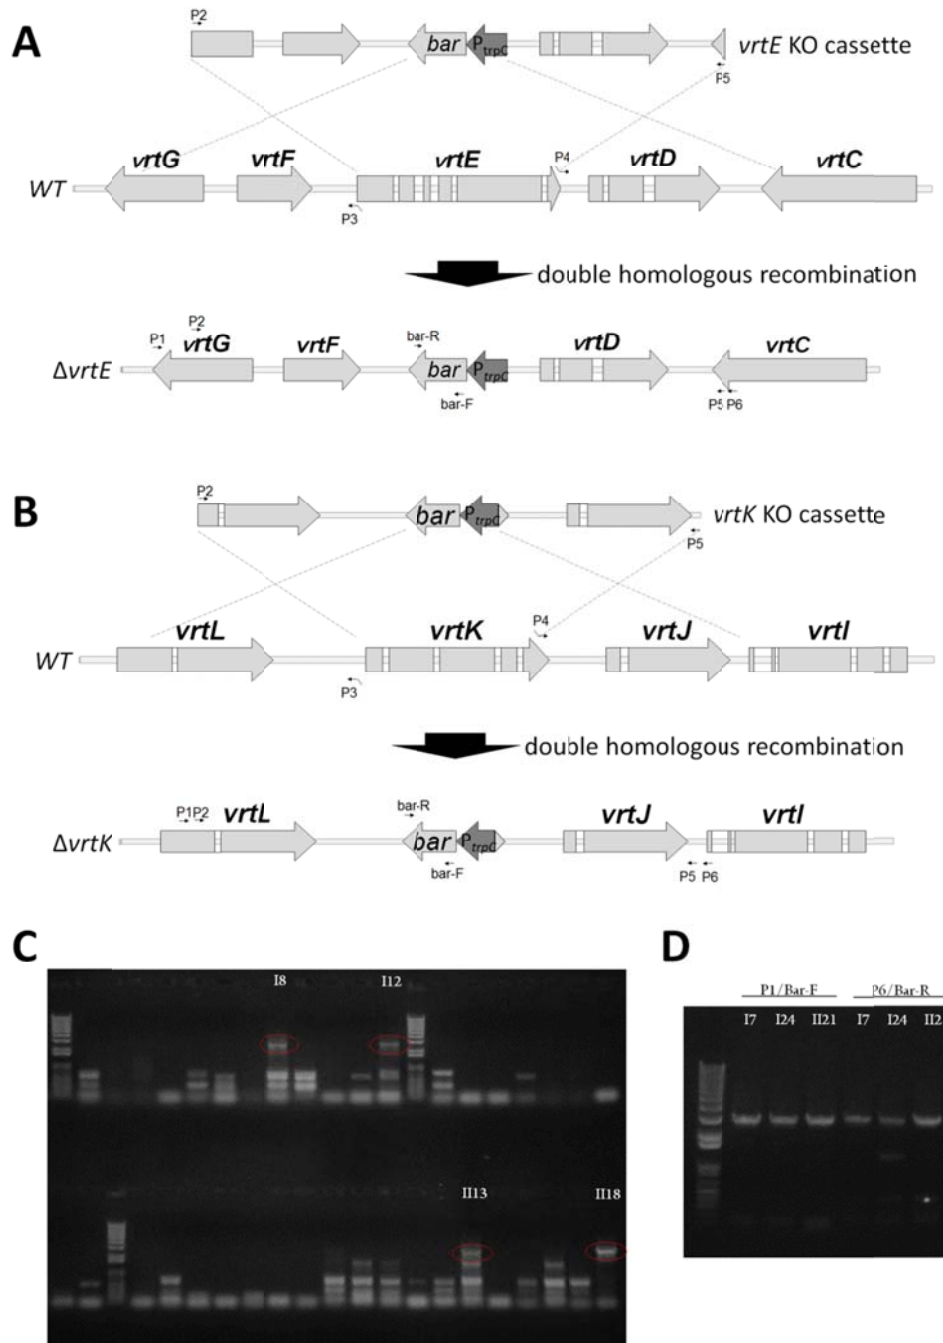

**Figure S1.** Gene deletion strategy for (A) *vrtE* and (B) *vrtK*, by double homologous replacement in *P. aethiopicum*  $\Delta$ *gsfA::zeo<sup>R</sup>*. Each of the flanking homologous region on the knockout (KO) cassette is about 2 kb in length. Primer pairs P1/bar-F and P6/bar-R were used for screening of positive transformants. 48 colonies from each transformation were first screened by P1/bar-F primers from genomic DNA extracted with a rapid toothpick/alkaline lysis miniprep method described previously,<sup>2,4</sup> (C) an example of gel electrophoresis for screening of  $\Delta$ *vrtK* colonies using P1/bar-F (correct band size circled). Positive transformants is re-verified with both pair of primers using higher quality genomic DNA, e.g. (D)  $\Delta$ *vrtE* positive transformants.

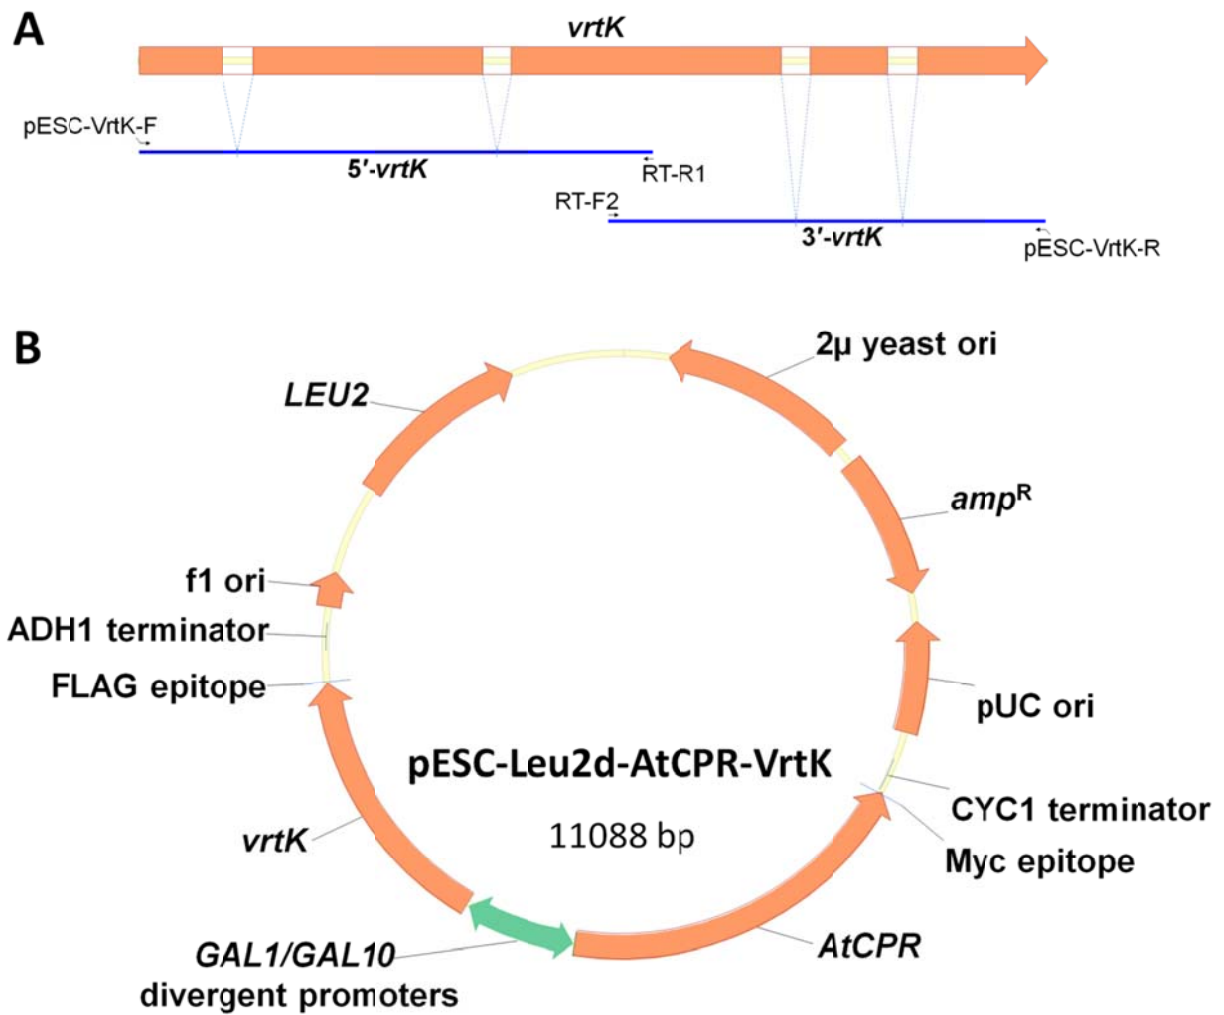

**Figure S2.** Construction of pESC-Leu2d-AtCPR-VrtK. (A) RT-PCR of overlapping 5'-*vrtK* and 3'-*vrtK* fragments. (B) The plasmid map of pESC-Leu2d-AtCPR-VrtK containing *A. terreus* cytochrome P450 reductase (AtCPR) gene and *vrtK* under the regulation of *GAL1/GAL10* divergent promoter.

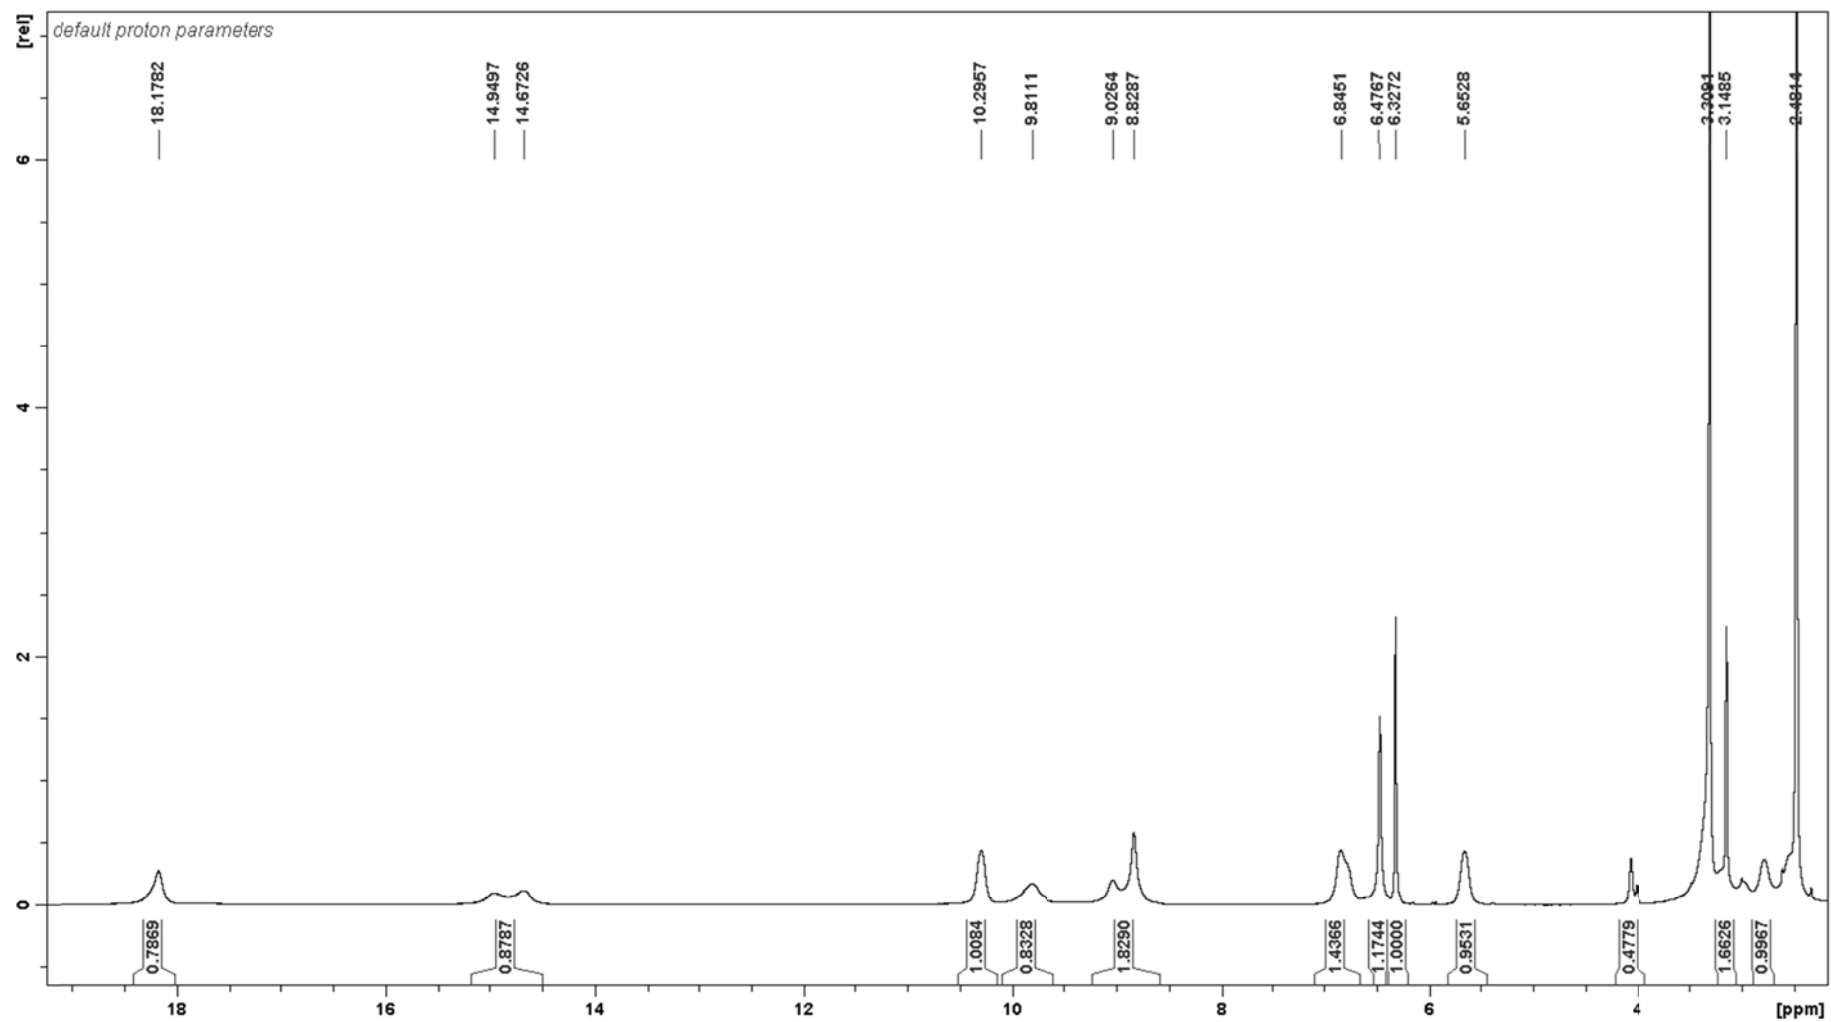

**Figure S3.**  $^1\text{H}$ -NMR spectrum of compound **3** in DMSO- $d_6$  measured on 500 MHz Bruker NMR spectrometer (see Table S2 for peak assignments).

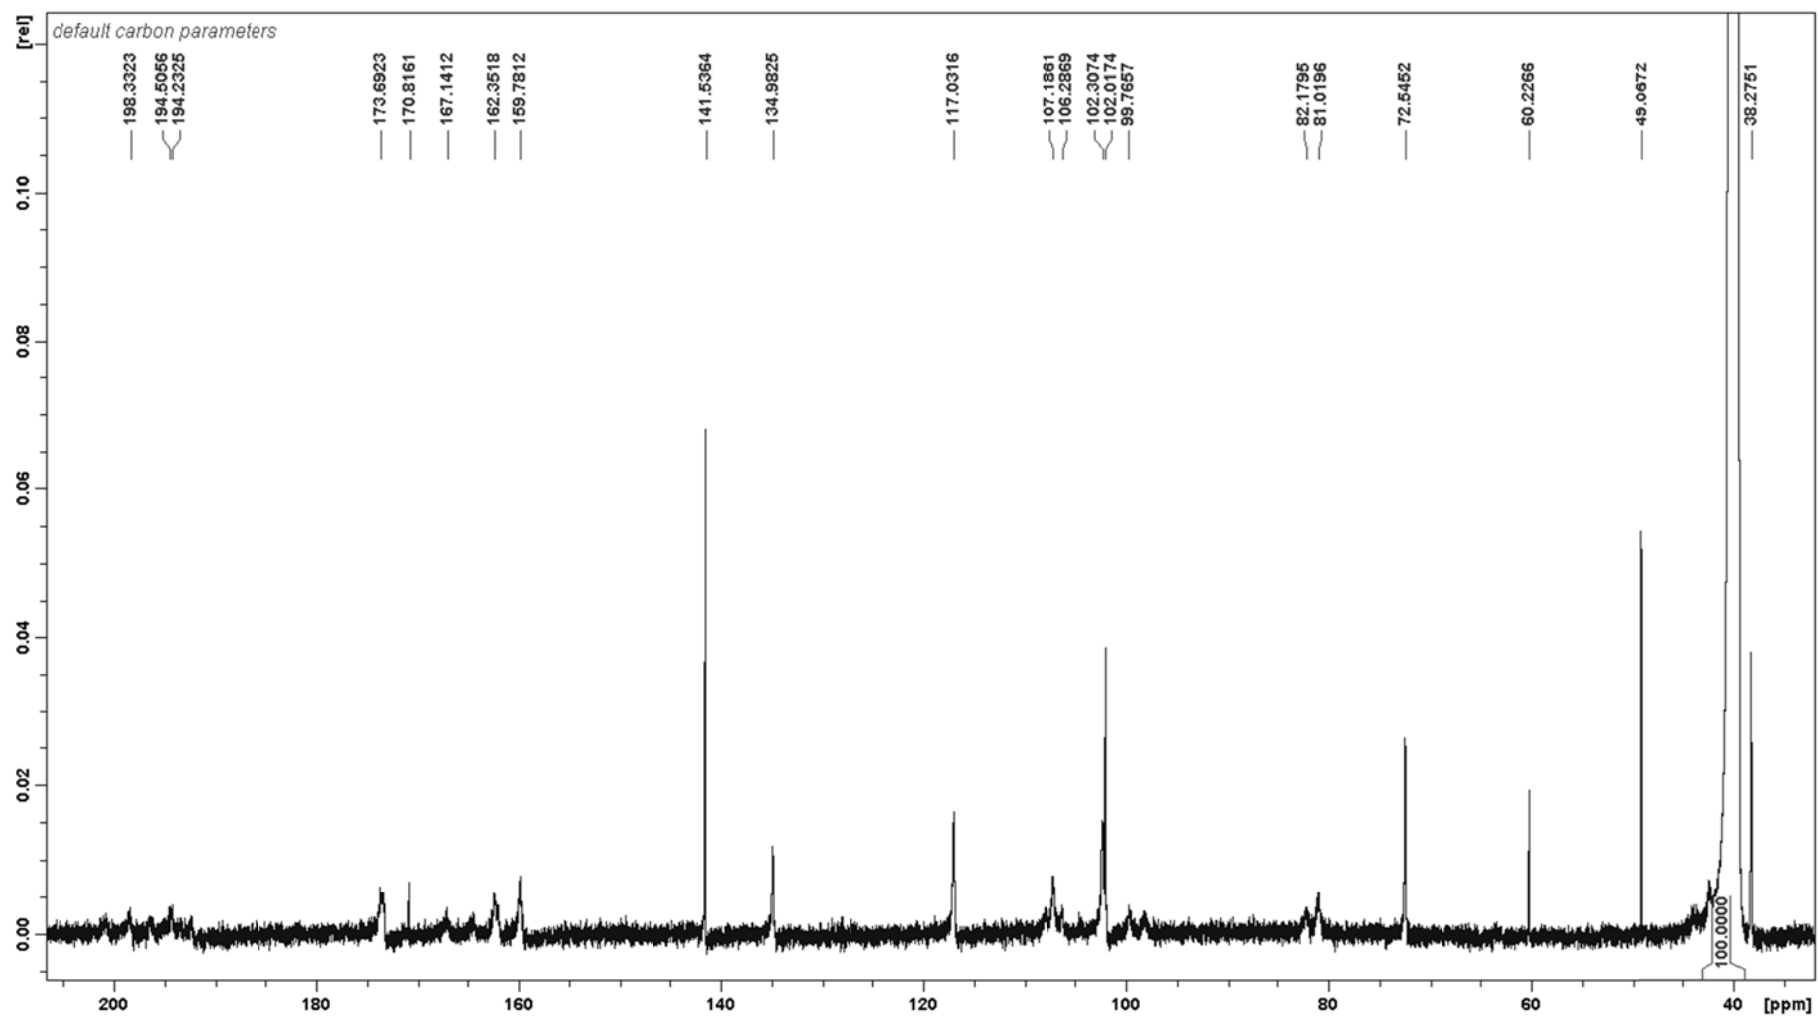

**Figure S4.**  $^{13}\text{C}$ -NMR spectrum of compound **3** in DMSO- $d_6$  measured on 500 MHz Bruker NMR spectrometer (see Table S2 for peak assignments).

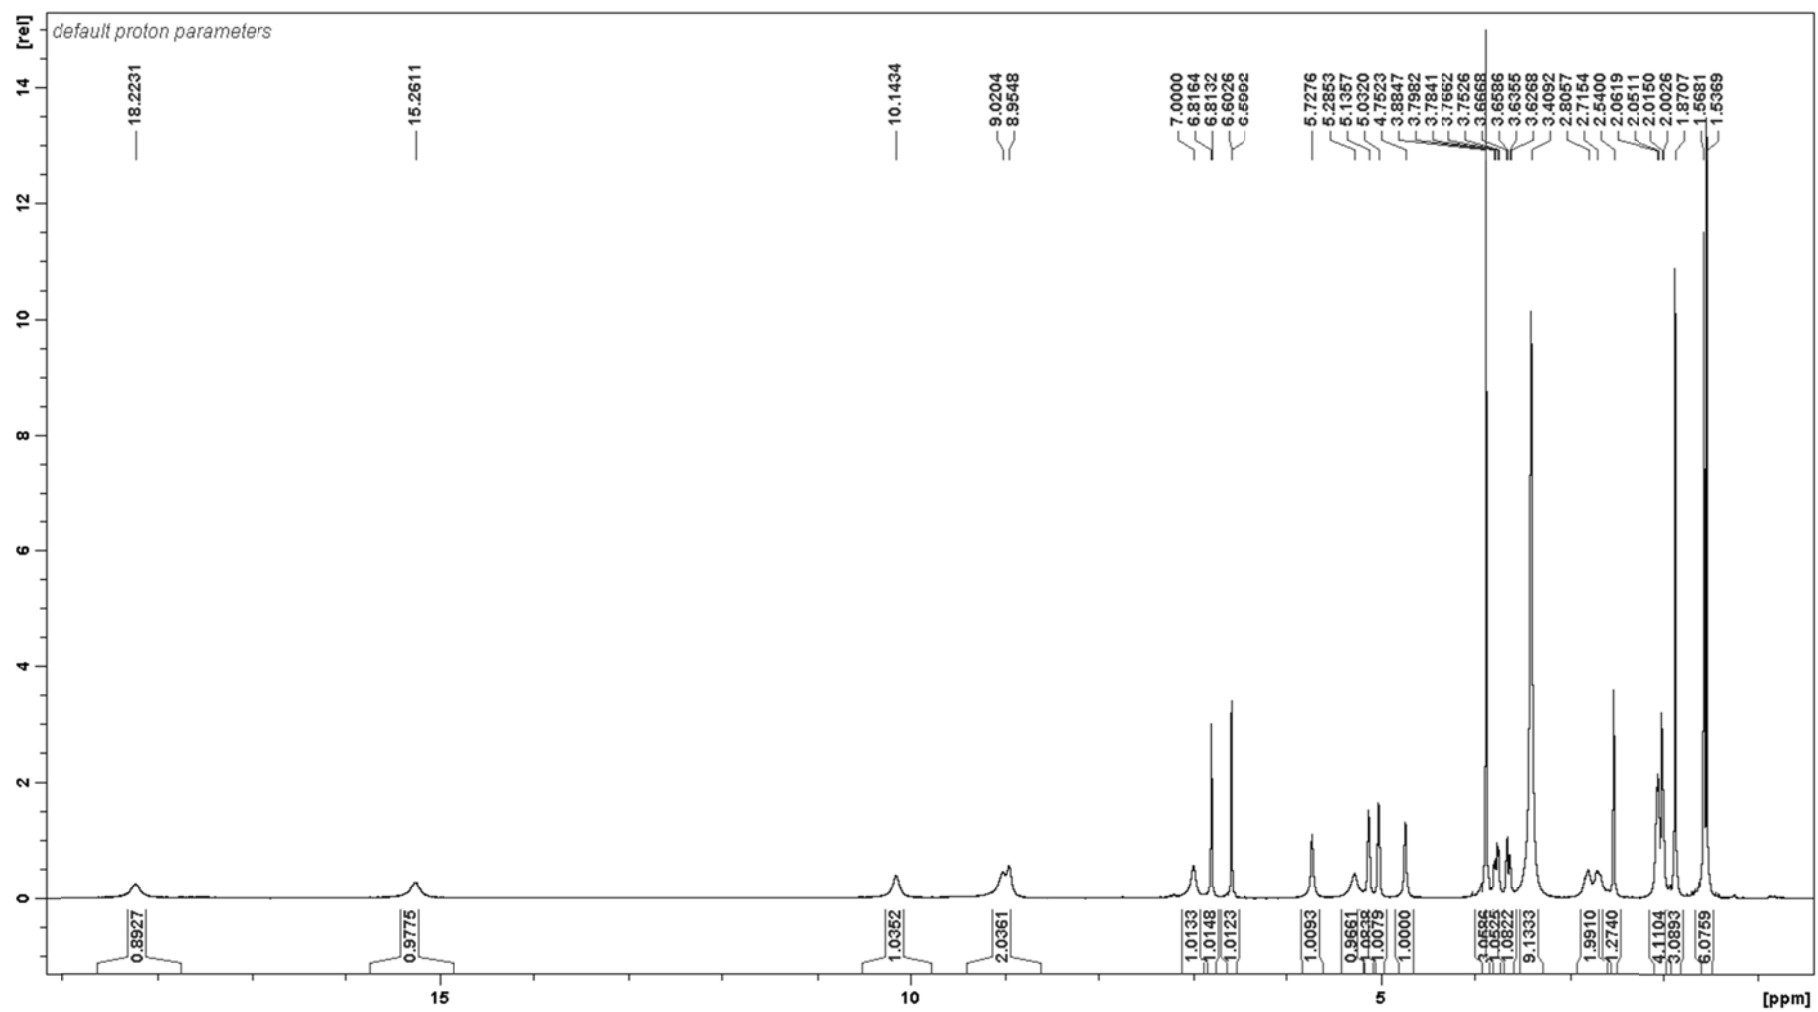

**Figure S5.**  $^1\text{H-NMR}$  spectrum of compound **2** in DMSO- $d_6$  measured on 500 MHz Bruker NMR spectrometer (see Table S3 for peak assignments).

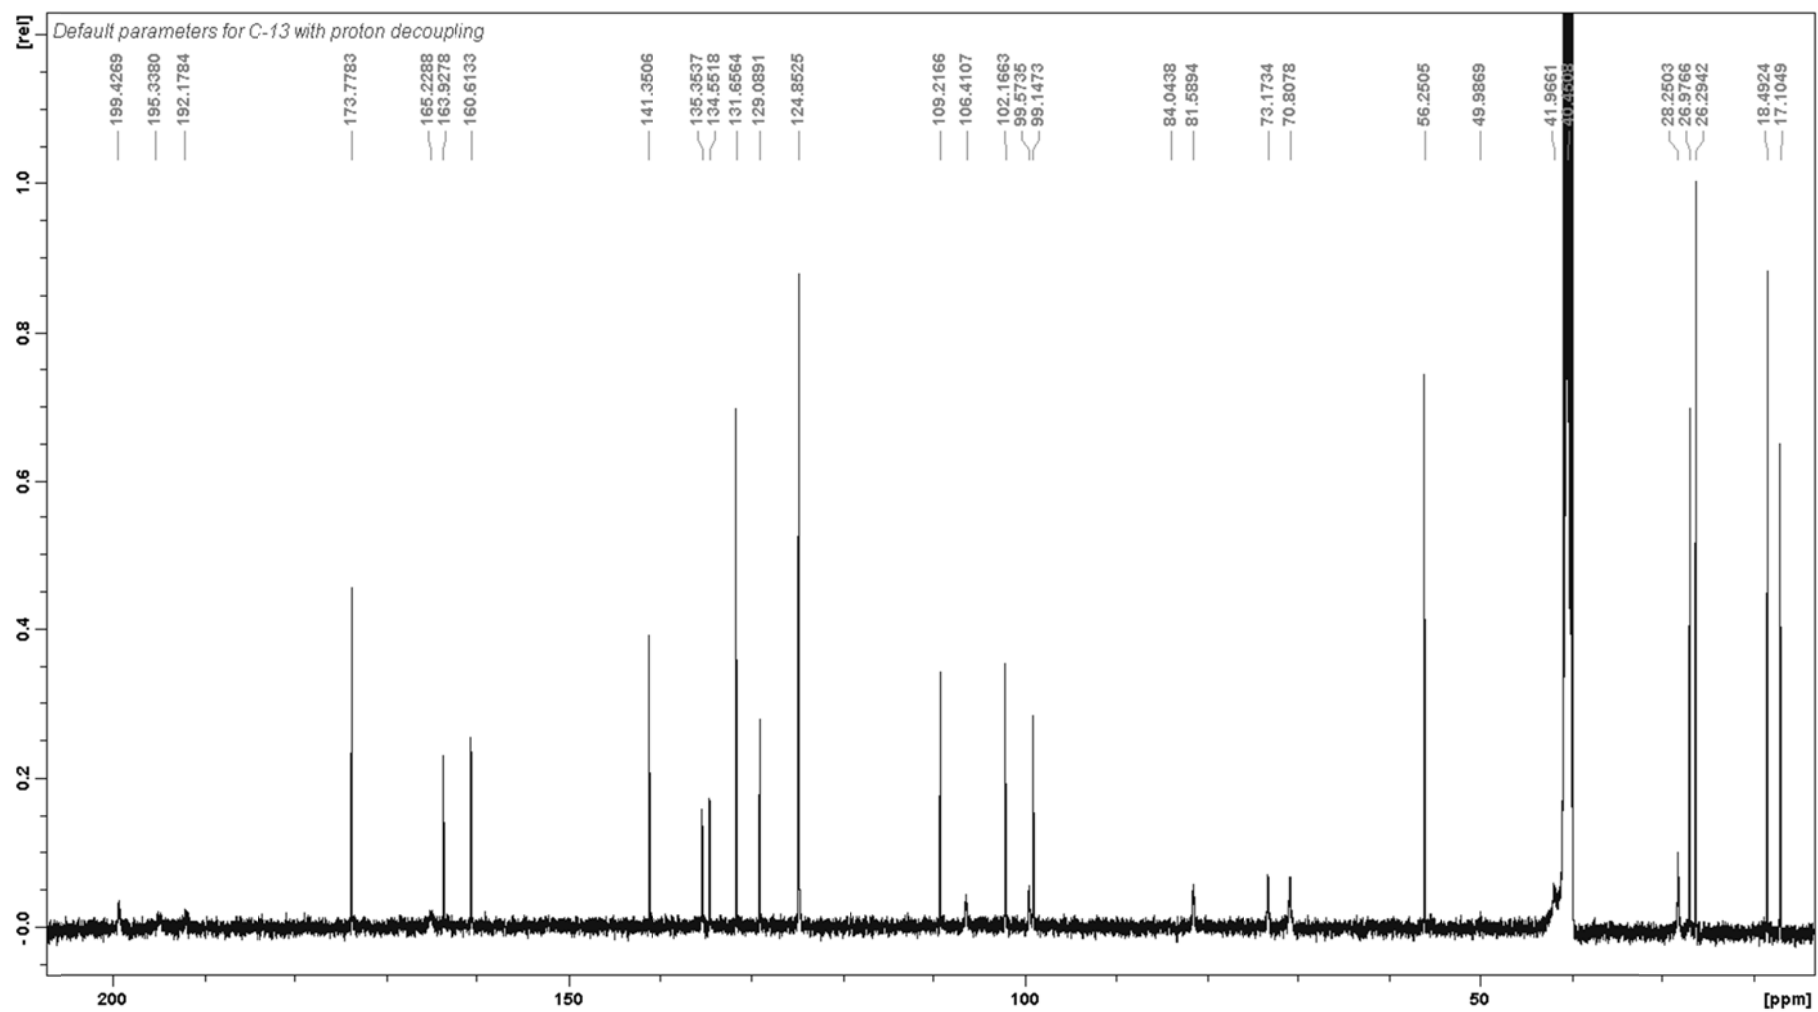

**Figure S6.**  $^{13}\text{C}$ -NMR spectrum of compound **2** in DMSO- $d_6$  measured on 500 MHz Bruker NMR spectrometer (see Table S3 for peak assignments).



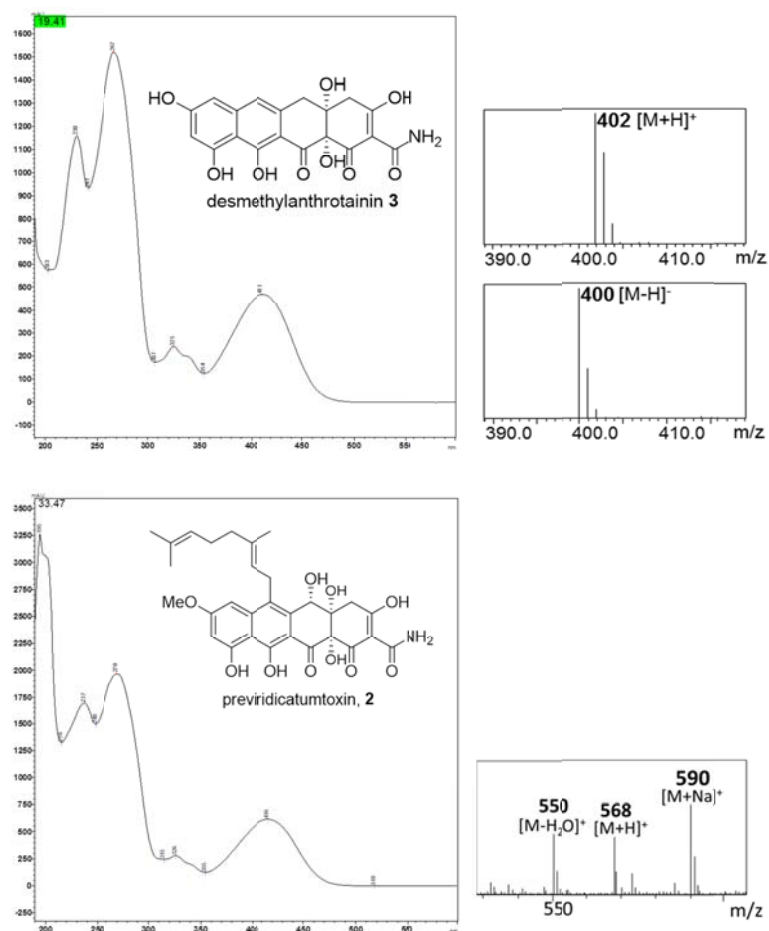

**Figure S7.** UV and mass spectra of **3** and **2**.

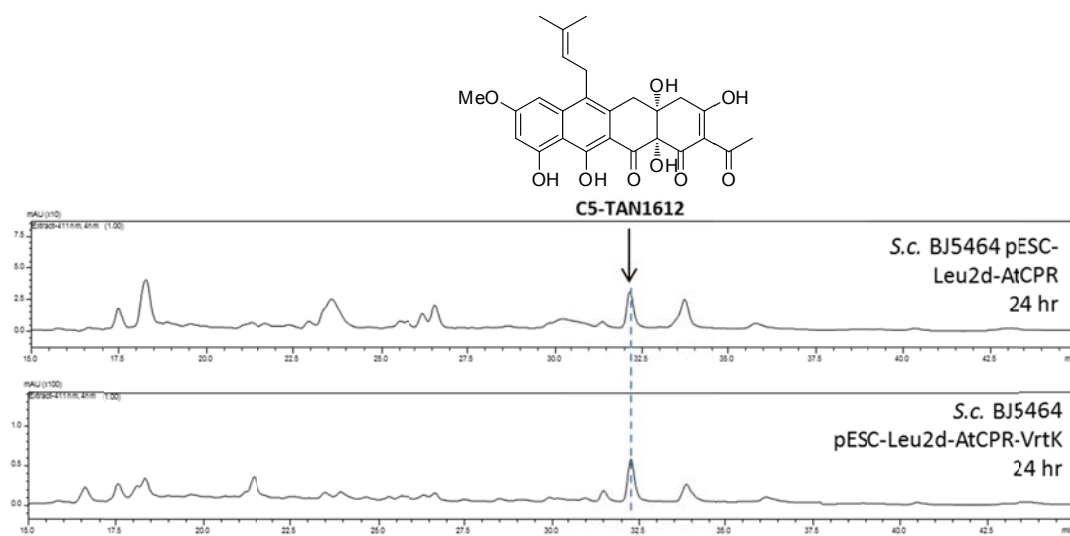

**Figure S8.** Feeding of dimethylallyl(C5)-TAN1612 substrate to high density yeast cultures. Conversion of the substrate can be observed in both the experimental (pESC-Leu2d-AtCPR-VrtK) and negative control (pESC-Leu2d-AtCPR). Compound **2** can be converted to **1** in the substrate experiment, as shown in Figure 2.

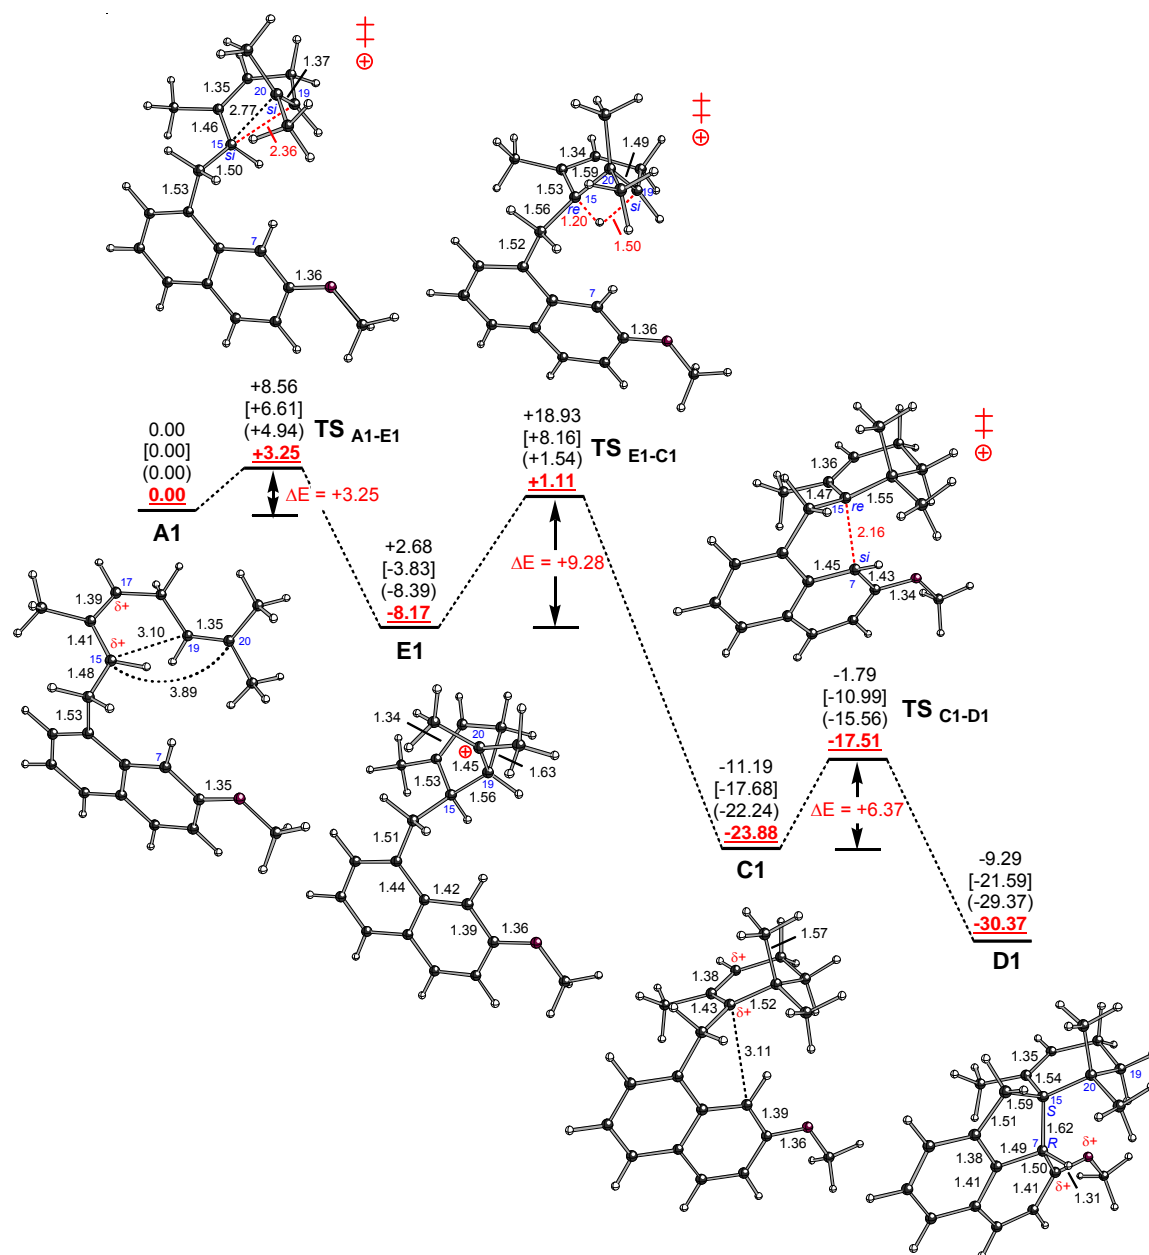

**Figure S9 (i).** Computed Reaction Pathways. Path 1: **A1**→**D1**. Reaction energy diagram from M06-2X/6-31+G(d,p)//B3LYP/6-31+G(d,p) calculations for **path 1**; Energies (in kcal/mol) from B3LYP (in normal texts), mPW1PW91 (in brackets), MPWB1K (in parentheses) are also shown. Overall the highest barrier (9.28 kcal/mol) is in the step involving hydride shift (**E1**→**C1**). Path 1 leads to (7*R*,15*S*)-**D1** and subsequent deprotonation will generate **1a**.

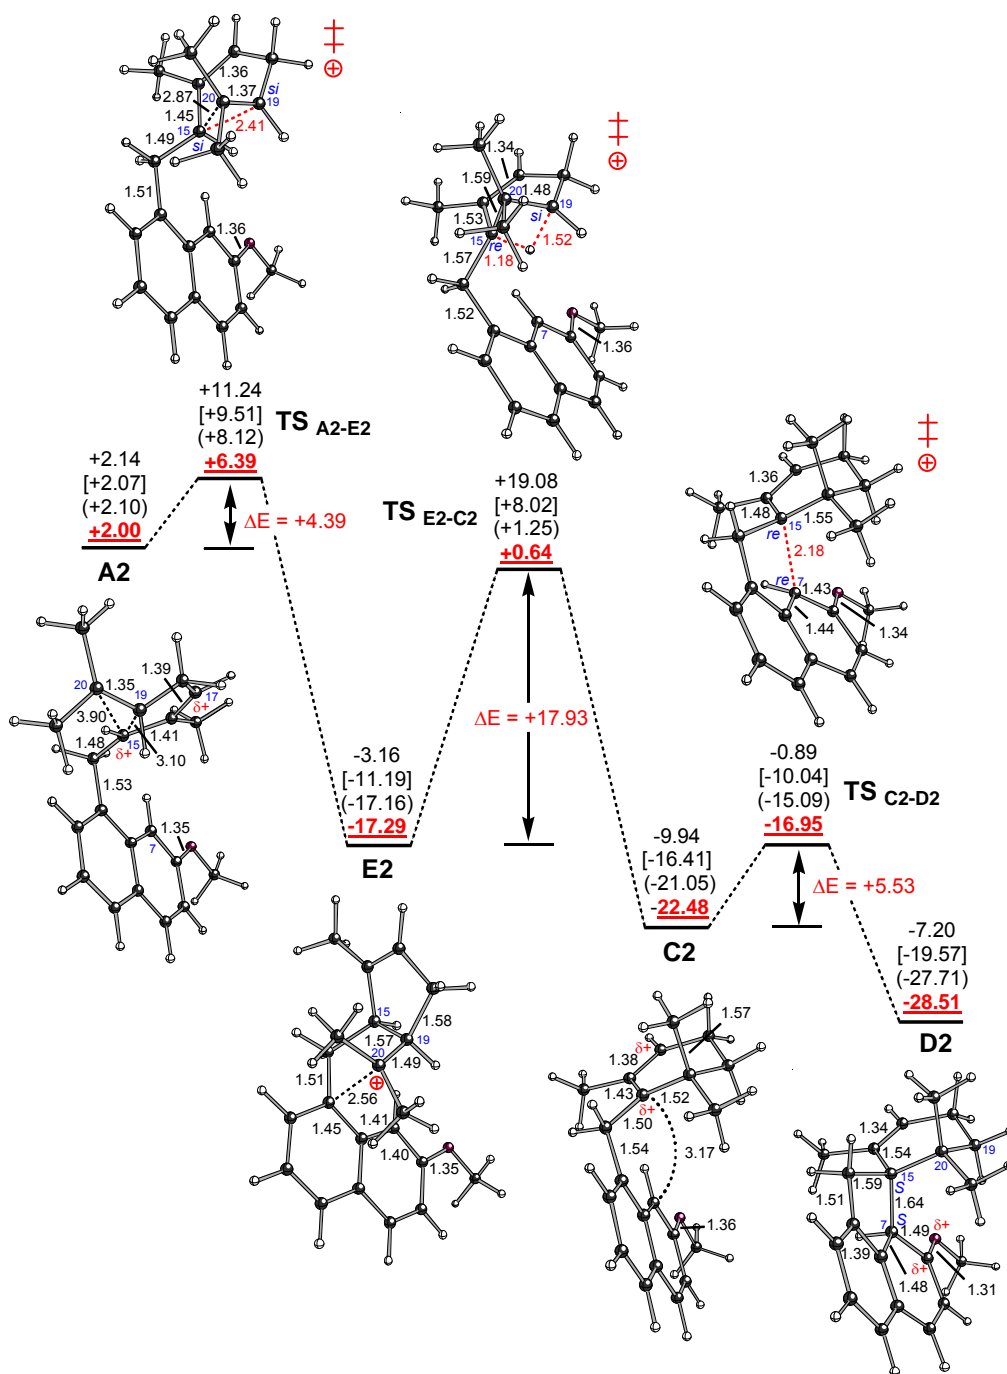

**Figure S9 (ii).** Computed Reaction Pathways. Path 2:  $A2 \rightarrow D2$ .

Reaction energy diagram from M06-2X/6-31+G(d,p)//B3LYP/6-31+G(d,p) calculations for **path 2**; Energies (in kcal/mol) from B3LYP (in normal texts), mPW1PW91 (in brackets), MPWB1K (in parentheses) are also shown. The step involving hydride shift has overall the highest barrier (17.93 kcal/mol). **E2** is significantly more stable than **E1** (stabilization through cation- $\pi$  interaction), which results in increase in the barrier for hydride transfer. Note **TS**<sub>E2-C2</sub> has slightly lower energy than that of **TS**<sub>E1-C1</sub>. **D2** is a diastereomer of **D1** (Fig. S1). Deprotonation of **D2** will also generate **1a**. For an alternative conversion of **E2**, see Fig. S4.

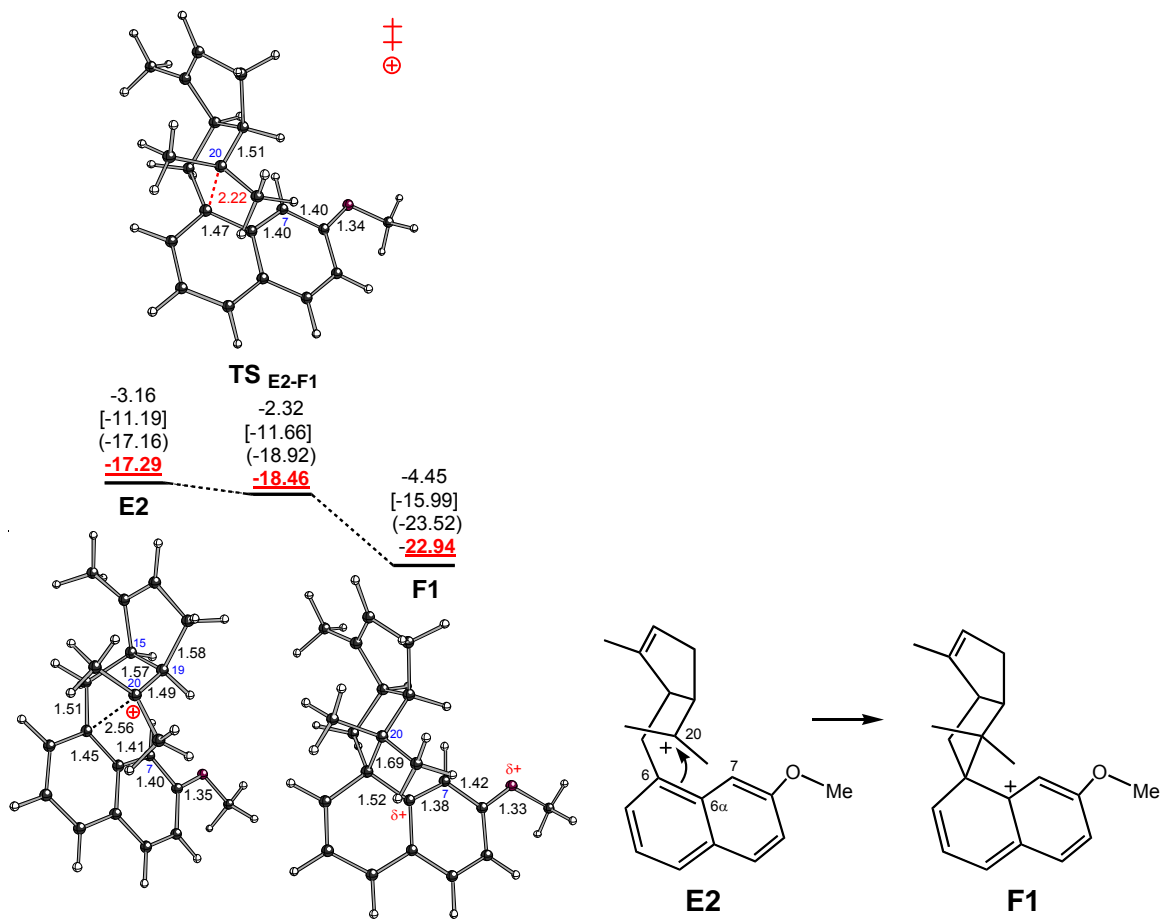

**Figure S9 (iii).** Computed Reaction Pathways. **E2** $\rightarrow$ **F1** conversion. **E2** $\rightarrow$ **F1** conversion (M06-2X/6-31+G(d,p) in red and underlined); Energies (in kcal/mol) from B3LYP (in normal texts), mPW1PW91 (in brackets) and MPWB1K (in parentheses) are also shown.

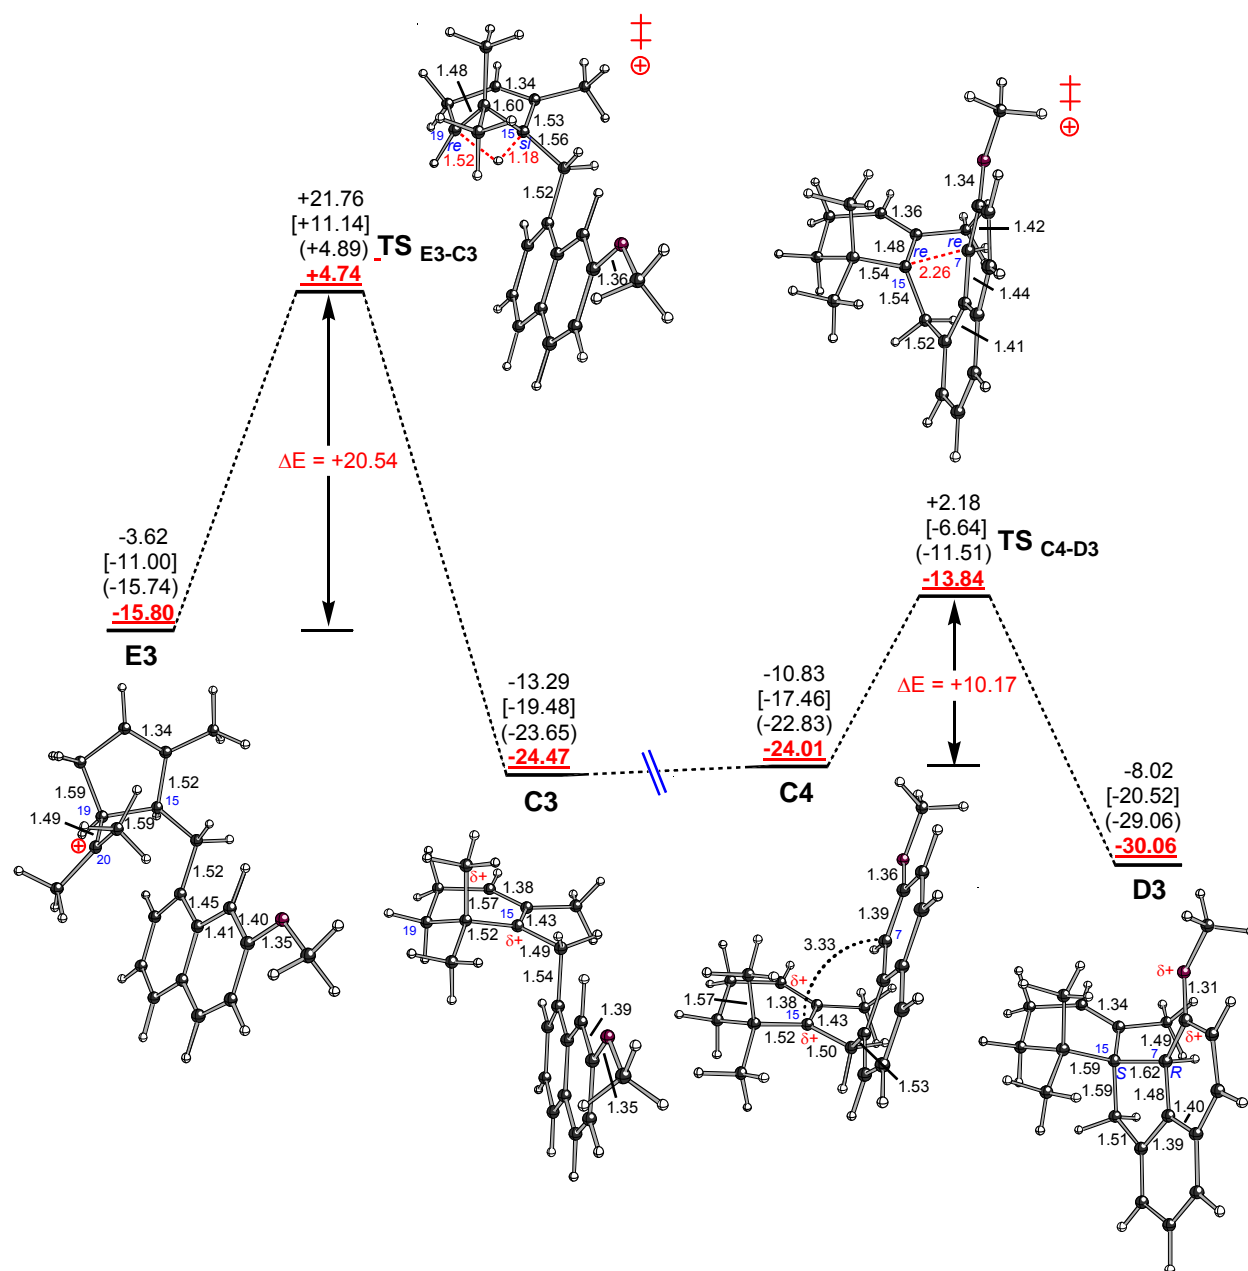

**Figure S9(iv).** Computed Reaction Pathways. Path 3: **E3** → **D3**.

Reaction energy diagram from M06-2X/6-31+G(d,p)//B3LYP/6-31+G(d,p) calculations for **path 3**; Energies (in kcal/mol) from B3LYP (in normal texts), mPW1PW91 (in brackets), MPWB1K (in parentheses) are also shown. The step involving hydride shift has 20.54 kcal/mol barrier.

Transition state structure for the hydride transfer for anti assembled **C** (such as **C4** conformation) could not be found due to steric clash (See Fig. S7, top). Conformation change of **C3** to **C4** may also experience steric clash. In addition, steric clash is expected in **C3** conformation in the case of full system. **E3** is significantly more stable than **E1** (Fig. S1, path 1) while energy of **TS E3-C3** is ~4 kcal/mol higher than that of **TS E1-C1** (Fig. S1, path 1). For the **C4** → **D3** has ~4 kcal/mol higher barrier compared to corresponding reaction in path 1. Deprotonation of **D3** (conformation isomer of **D1** (Fig. S1)) will generate **1a**.

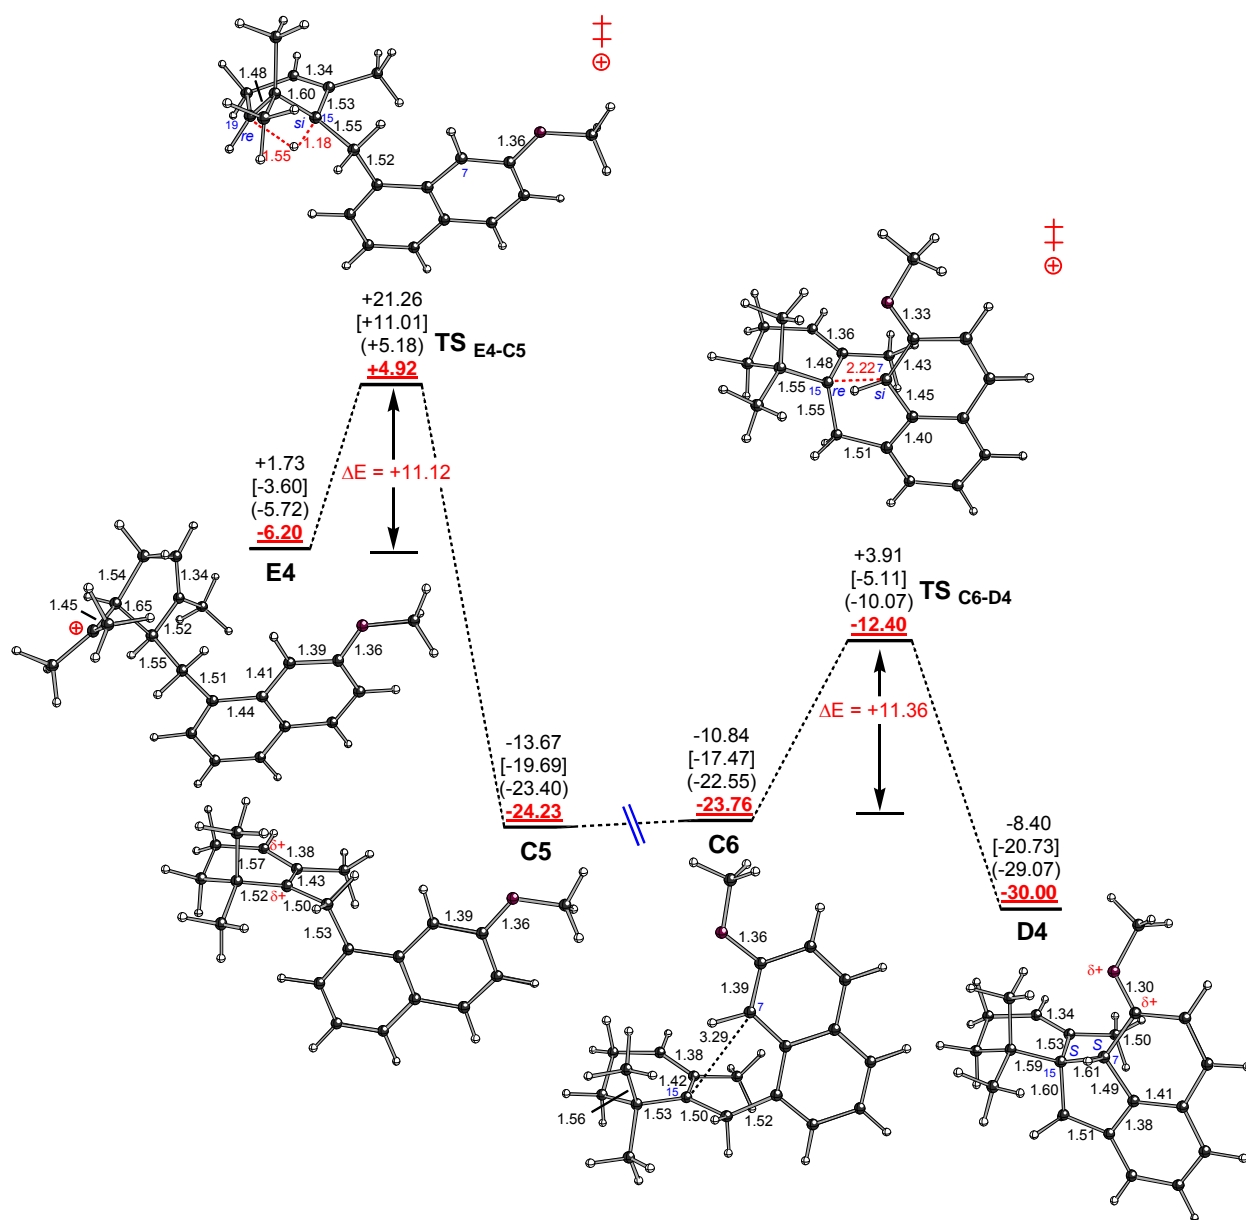

**Figure S9 (v).** Computed Reaction Pathways. Path 4:  $E4 \rightarrow D4$ .

Reaction energy diagram and computed transition state structures and carbocation structures from M06-2X/6-31+G(d,p)//B3LYP/6-31+G(d,p) calculations for **path 4**; Energies (in kcal/mol) from B3LYP (in normal texts), mPW1PW91 (in brackets), MPWB1K (in parentheses) are also shown. The step involving hydride shift has 11.12 kcal/mol barrier. **TS C6-D4** has ~5kcal/mol higher energy than that of **TS C1-D1** (Fig. S1, path 1). Steric clash likely impedes hydride shift of *anti* assembly of **C** that may lead to **C6** (See Fig. S7, bottom). Deprotonation of **D4** (conformation isomer of **D2** (Fig. S2)) will generate **1a**.

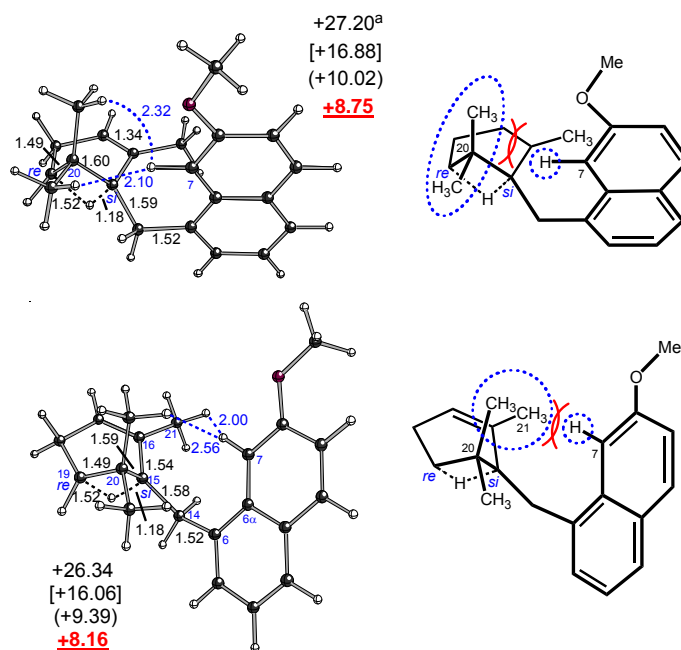

**Figure S9 (vi).** Computed Reaction Pathways. *si*  $\rightarrow$  *re* Facial 1,3-hydride shift.

Computed geometries (**not stationary points**) for *si*  $\rightarrow$  *re* facial 1,3-hydride shift (B3LYP/6-31+G(d,p); imaginary frequency corresponds to hydride shifting motion, distances C5-H-C19 and dihedral angle C15-C14-C6-C6 $\alpha$  are constrained.). Energies (kcal/mol) are relative to that of **A1** (Fig. S1). B3LYP/6-31+G(d,p) in normal texts, mPW1PW91/6-31+G(d,p) in brackets, MPWB1K/6-31+G(d,p) in parentheses and M06-2X/6-31+G(d,p) in red and underlined. Aromatic ring (especially hydrogen at C7) clashes with methyl groups in cyclohexenyl ring. Full optimization of top and bottom structures without constrains led to transition state structures **TS**<sub>E3-C3</sub> (Fig. S5) and **TS**<sub>E4-C5</sub> (Fig. S6), respectively. <sup>a</sup> small additional imaginary frequency (-7.07 cm<sup>-1</sup>) is associated with aromatic ring movement.

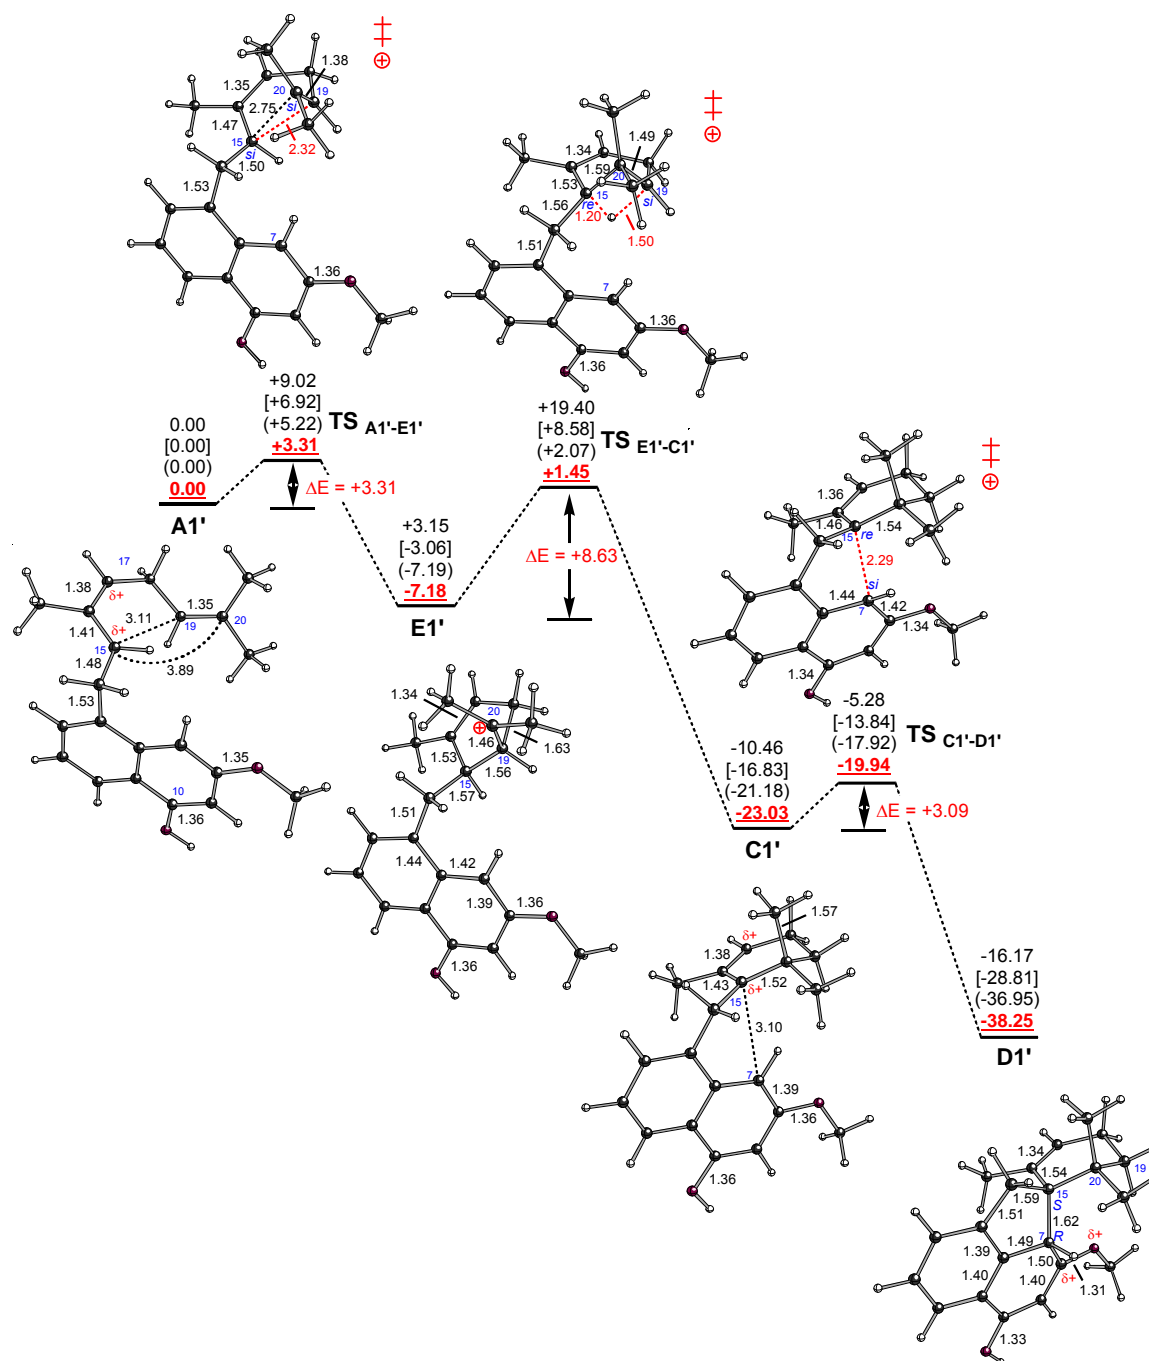

**Figure S9 (vii).** Computed Reaction Pathways. Path 1:  $A1' \rightarrow D1'$ .

Reaction energy diagram from M06-2X/6-31+G(d,p)//B3LYP/6-31+G(d,p) calculations for path 1 (Scheme 2; R=OH, Fig. 3 and Table 1); Energies (in kcal/mol) from B3LYP (in normal text), mPW1PW91 (in brackets), MPWB1K (in parentheses) are also shown. Overall the highest barrier (9.28 kcal/mol) is in the step involving hydride shift ( $E1' \rightarrow C1'$ ). Path 1 leads to (7*R*,15*S*)- $D1'$  and subsequent deprotonation will generate  $1a'$ .



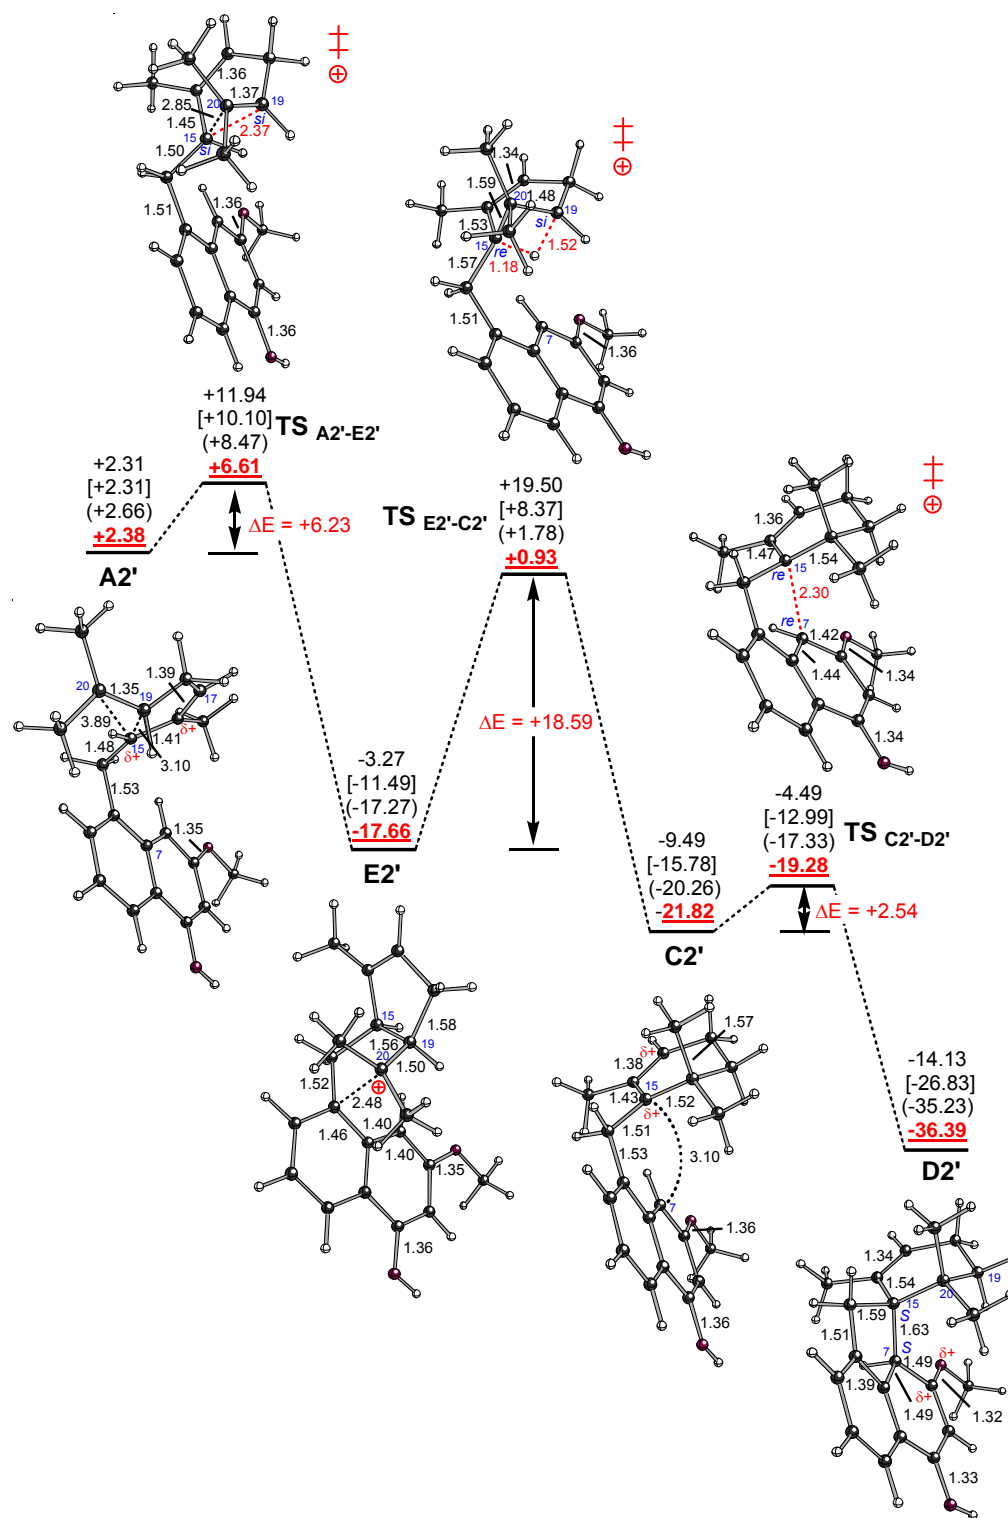

**Figure S9 (viii).** Computed Reaction Pathways. Path 2:  $A2' \rightarrow D2'$ .

Reaction energy diagram from M06-2X/6-31+G(d,p)//B3LYP/6-31+G(d,p) calculations for path 2 (Scheme 2; R=OH, Fig. 3 and Table 1); Energies (in kcal/mol) from B3LYP (in normal texts), mPW1PW91 (in brackets), MPWB1K (in parentheses) are also shown. The step involving hydride shift has overall the highest barrier (17.93 kcal/mol). Deprotonation of  $D2'$  (a diatereomer of  $D1'$ ) will also generate  $1a'$

## Supplementary References

- (1) Gao, X.; Chooi, Y.-H.; Ames, B. D.; Wang, P.; Walsh, C. T.; Tang, Y. *J. Am. Chem. Soc.* **2011**, *133*, 2729.
- (2) Chooi, Y. H.; Cacho, R.; Tang, Y. *Chem. Biol.* **2010**, *17*, 483.
- (3) Szewczyk, E.; Nayak, T.; Oakley, C. E.; Edgerton, H.; Xiong, Y.; Taheri-Talesh, N.; Osmani, S. A.; Oakley, B. R. *Nat. Protoc.* **2007**, *1*, 3111.
- (4) Chooi, Y. H.; Stalker, D. M.; Davis, M. A.; Fujii, I.; Elix, J. A.; Louwhoff, S. H.; Lawrie, A. C. *Mycol. Res.* **2008**, *112*, 147.
- (5) Jones, E. W. *Methods Enzymol.* **1991**, *194*, 428.
- (6) Wong, S.-M.; Kullnig, R.; Dedinas, J.; Appell, K. C.; Kydd, G. C.; Gillum, A. M.; Cooper, R.; Moore, R. *J. Antibiot.* **1993**, *46*, 214.
- (7) Frisch, M. J.; Trucks, G. W.; Schlegel, H. B.; Scuseria, G. E.; Robb, M. A.; Cheeseman, J. R.; Scalmani, G.; Barone, V.; Mennucci, B.; Petersson, G. A.; Nakatsuji, H.; Caricato, M.; Li, X.; Hratchian, H. P.; Izmaylov, A. F.; Bloino, J.; Zheng, G.; Sonnenberg, J. L.; Hada, M.; Ehara, M.; Toyota, K.; Fukuda, R.; Hasegawa, J.; Ishida, M.; Nakajima, T.; Honda, Y.; Kitao, O.; Nakai, H.; Vreven, T.; Jr., J. A. M.; J. E. Peralta; Ogliaro, F.; Bearpark, M.; Heyd, J. J.; Brothers, E.; Kudin, K. N.; Staroverov, V. N.; Keith, T.; Kobayashi, R.; Normand, J.; Raghavachari, K.; Rendell, A.; Burant, J. C.; Iyengar, S. S.; Tomasi, J.; Cossi, M.; Rega, N.; Millam, J. M.; Klene, M.; Knox, J. E.; Cross, J. B.; Bakken, V.; Adamo, C.; Jaramillo, J.; Gomperts, R.; R. E. Stratmann; Yazyev, O.; Austin, A. J.; Cammi, R.; Pomelli, C.; Ochterski, J. W.; Martin, R. L.; Morokuma, K.; Zakrzewski, V. G.; Voth, G. A.; Salvador, P.; Dannenberg, J. J.; Dapprich, S.; Daniels, A. D.; Farkas, O.; Foresman, J. B.; Ortiz, J. V.; Cioslowski, J.; Fox, D. *J. Gaussian 09 Full reference: Gaussian 09*; Revision B.01 ed.; Gaussian, Inc.: Wallingford CT.
- (8) B3LYP: (a) Becke, A.D. *J. Chem. Phys.* **1993**, *98*, 1372-1377. (b) Becke, A.D. *J. Chem. Phys.* **1993**, *98*, 5648-5652. (c) Lee, C.; Yang, W.; Parr, R.G. *Phys. Rev. B* **1988**, *37*, 785-789. (d) Stephens, P.J.; Devlin, F. J.; Chabalowski, C.F.; Frisch, M. J. *J. Phys. Chem.* **1994**, *98*, 11623-11627. (e) Tirado-Rives, J.; Jorgensen, W. L. *J. Chem. Theory Comput.* **2008**, *4*, 297-306.
- (9) (a) Gonzalez, C.; Schlegel, H. B. *J. Phys. Chem.* **1990**, *94*, 5523-5527. (b) Fukui, K. *Acc. Chem. Res.* **1981**, *14*, 363-368.
- (10) Matsuda, S.P.T.; Wilson, W.K.; Xiong, Q. *Org. Biomol. Chem.* **2006**, *4*, 530-543.
- (11) (a) Hohenstein, E. G.; Chill, S. T.; Sherrill, C. D. *J. Chem. Theory Comput.* **2008**, *4*, 1996-2000.; (b) Zhao, Y.; Truhlar, D. G. *Theor. Chem. Account.* **2008**, *120*, 215-241.
- (12) Zhao, Y.; Truhlar, D. G. *J. Phys. Chem. A.* **2004**, *108*, 6908-6918.
- (13) Tantillo, D. J. *Nat. Prod. Rep.* **2011**, *28*, 1035-1053.
- (14) Müller, N.; Falk, A.; Gsaller, G. *Ball & Stick V.4.0a12*, molecular graphics application for MacOS computers, Johannes Kepler University, Linz, 2004.
